# Supplementary material for: Base mediated synthesis of 2-aryl-2,3-dihydroquinazolin-4(1H)-ones from 2-aminobenzonitriles and aromatic aldehydes in water
Source: Royal Society of Chemistry journal article supplement (doi:10.1039/c3ob42434k), 2014-01-01

## Supporting Information

### General remarks:

All Chemicals were commercial available and were used without further purification. NMR-data was recorded by a Bruker ARX 300 and Bruker ARX 400 spectrometers.  $^{13}\text{C}$ - and  $^1\text{H}$ -spectra were referenced to deuterated solvent signals. Peaks were characterized as singlet (*s*), doublet (*d*), doublet of doublet (*dd*), triplet (*t*), doublet of triplets (*dt*), quartet (*q*) and multiplet (*m*). Gas-chromatographie-mass-analysis was measured by an Agilent HP-5890 with Agilent HP-5973 Mass Selective Detector (EI) and HP-5-capillary column using helium as carrier gas. Column-chromatographie was carried out using Merck 60 Silica-Gel (0.043 - 0.06 mm) and distilled solvents were used.

### General experimental procedure:

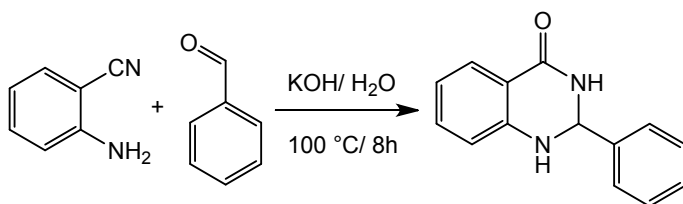

### 2-Phenyl-2,3-dihydroquinazolin-4(1H)-one

$^1\text{H-NMR}$  (250 MHz, DMSO-*d*<sub>6</sub>):  $\delta$  = 8.28 (*s*, 1H, NH(3)), 7.61 (*dd*, 1H,  $^3J$  = 7.8 Hz,  $^4J$  = 1.6 Hz, CH(5)), 7.49 (*dd*, 2H,  $^3J$  = 7.9 Hz,  $^4J$  = 1.9 Hz, CH(10 + 14)), 7.45 - 7.29 (*m*, 3H, CH(11 + 12 + 13)), 7.24 (*ddd*, 1H,  $^3J$  = 8.1 Hz,  $^3J$  = 7.2 Hz,  $^3J$  = 1.6 Hz, CH(7)), 7.11 (*s*, 1H, NH(1)), 6.78 - 6.72 (*m*, 1H, CH(8)), 6.71 - 6.63 (*m*, 1H, CH(6)), 5.75 (*t*, 1H,  $^3J$  = 1.9 Hz, CH(2));  $^{13}\text{C-NMR}$  (63 MHz, DMSO-*d*<sub>6</sub>):  $\delta$  = 163.6 (C=O(4)), 147.8 (C<sub>quart</sub>(8a)), 141.6 (C<sub>quart</sub>(9)), 133.3 (CH(7)), 128.4 (CH(12)), 128.3 (CH(11 + 13)), 127.3 (CH(5)), 126.8 (CH(10 + 14)), 117.1 (CH(6)), 114.9 (C<sub>quart</sub>(4a)), 114.4 (CH(8)), 66.5 (CH(2)) ppm; MS: (EI, 70 eV) *m/z* (%) = 224 ([M]<sup>+</sup>, 19), 223 (27), 147 (100), 120 (42), 119 (15), 104 (10), 92 (29), 77 (20), 65 (14), 64 (10), 51 (15).

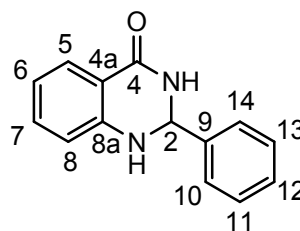

### 2-Phenyl-7-chloro-2,3-dihydroquinazolin-4(1H)-one

$^1\text{H-NMR}$  (300 MHz, DMSO-*d*<sub>6</sub>):  $\delta$  = 8.47 (*s*, 1H, NH(3)), 7.54 (*d*, 1H,  $^4J$  = 2.6 Hz, CH(8)), 7.50 - 7.45 (*m*, 2H, CH(10 + 14)), 7.44 - 7.34 (*m*, 3H, CH(11 + 12 + 13)), 7.34 - 7.32 (*m*, 1H, NH(1)), 7.28 (*dd*, 1H,  $^3J$  = 8.7 Hz,  $^4J$  = 2.7 Hz, CH(6)), 6.78 (*d*, 1H,  $^3J$  = 8.7 Hz, CH(8)), 5.78 (*dd*, 1H,  $^3J$  = 1.9 Hz,  $^3J$  = 1.9 Hz, CH(2)) ppm;  $^{13}\text{C-NMR}$  (75 MHz, DMSO-*d*<sub>6</sub>):  $\delta$  = 162.4 (C=O(4)), 146.6 (C<sub>quart</sub>(8a)), 141.2 (C<sub>quart</sub>(9)), 133.1 (C<sub>quart</sub>(7)), 128.6 (CH(12)), 128.4 (CH(11 + 13)), 126.8 (CH(10 + 14)), 126.4 (CH(5)), 120.7 (CH(6)), 116.4 (CH(8)), 116.0 (C<sub>quart</sub>(4a)), 66.4 (CH(2)) ppm; MS: (EI, 70 eV) *m/z* (%) = 259 ([M]<sup>+</sup>, 10), 258 (20), 257 (27), 183 (37), 182 (14), 181 (100), 156 (18), 155 (11), 154 (46), 153 (15), 126 (26), 104 (17), 90 (10), 77 (27), 63 (18), 51 (19).

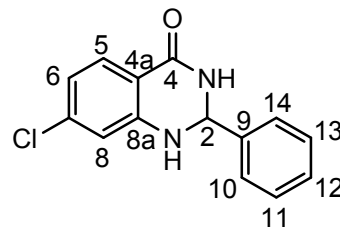

### 2-Phenyl-6-chloro-2,3-dihydroquinazolin-4(1H)-one

$^1\text{H-NMR}$  (300 MHz, DMSO-*d*<sub>6</sub>):  $\delta$  = 8.49 (*s*, 1H, NH(3)), 7.54 (*d*, 1H,  $^4J$  = 2.6 Hz, CH(5)), 7.50 - 7.45 (*m*, 2H, CH(10 + 14)), 7.44 - 7.35 (*m*, 3H, CH(11 + 12 + 13)), 7.34 (*s*, 1H, NH(1)), 7.28 (*dd*, 1H,  $^3J$  = 8.7 Hz,  $^4J$  = 2.6 Hz, CH(7)), 6.78 (*d*, 1H,  $^3J$  = 8.7 Hz, CH(8)), 5.78 (*dd*, 1H,  $^3J$  = 1.8 Hz,  $^3J$  = 1.8 Hz, CH(2)) ppm;  $^{13}\text{C-NMR}$  (75 MHz, DMSO-*d*<sub>6</sub>):  $\delta$  = 162.4 (C=O), 146.6 (C<sub>quart</sub>(8a)), 141.2 (C<sub>quart</sub>(9)), 133.1 (C<sub>quart</sub>(6)), 128.6 (CH(12)), 128.4 (CH(11 + 13)), 126.8 (CH(10 + 14)), 126.4 (CH(5)), 120.7 (CH(7)), 116.4 (CH(8)), 116.0 (C<sub>quart</sub>(4a)), 66.4 (CH(2)) ppm; MS: (EI, 70 eV) *m/z* (%) = 259 ([M]<sup>+</sup>, 10), 258 (23), 257 (27), 183 (30), 182 (11), 181 (100), 156 (12), 155 (10), 154 (34), 153 (18), 126 (22), 125 (10), 104 (12), 99 (10), 90 (11), 77 (24), 75 (10), 63 (16), 51 (15).

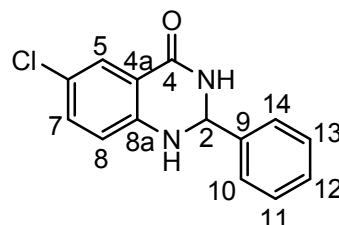

### 2-Phenyl-5-fluoro-2,3-dihydroquinazolin-4(1H)-one

$^1\text{H-NMR}$  (300 MHz, DMSO-*d*<sub>6</sub>):  $\delta$  = 8.33 (*s*, 1H, NH(3)), 7.51 - 7.45 (*m*, 3H, CH(10 + 14) + NH(1)), 7.44 - 7.34 (*m*, 3H, CH(11 + 12 + 13)), 7.21 (*ddd*, 1H,  $^3J$  = 8.2 Hz,  $^3J$  = 8.2 Hz,  $^4J$  = 5.8 Hz, CH(7)), 6.59 (*ddd*, 1H,  $^3J$  = 8.2 Hz,  $^4J$  = 0.7 Hz,  $^5J$  = 0.7 Hz, CH(8)), 6.39 (*ddd*, 1H,

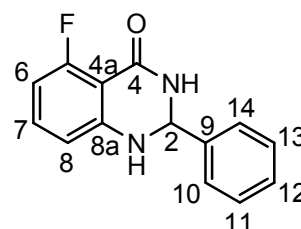

$^3J = 11.5$  Hz,  $^3J = 8.1$  Hz,  $^4J = 1.0$  Hz, CH(6)), 5.70 (*dd*, 1H,  $^3J = 1.9$  Hz,  $^3J = 1.9$  Hz, CH(2))) ppm;  $^{13}\text{C-NMR}$  (75 MHz, DMSO- $d_6$ ):  $\delta = 162.3$  (*d*,  $^1J = 256.7$  Hz, CF(5)), 160.9 (*d*,  $^3J = 2.7$  Hz, C=O(4)), 150.2 (*d*,  $^3J = 4.0$  Hz,  $\text{C}_{\text{quart}}(8a)$ ), 141.0 ( $\text{C}_{\text{quart}}(9)$ ), 134.1 (*d*,  $^3J = 11.5$  Hz, CH(7)), 128.6 (CH(12)), 128.4 (CH(11 + 13)), 126.9 (CH(10 + 14)), 110.5 (*d*,  $^4J = 3.4$  Hz, CH(8)), 104.5 (*d*,  $^2J = 21.3$  Hz, CH(6)), 103.83 (*d*,  $^2J = 9.3$  Hz,  $\text{C}_{\text{quart}}(4a)$ ), 66.0 (CH(2)) ppm; MS: (EI, 70 eV)  $m/z$  (%) = 242 ([M] $^+$ , 20), 241 (29), 166 (11), 165 (100), 138 (59), 137 (16), 110 (31), 82 (10), 77 (21), 51 (14).

### 2-Phenyl-6-methyl-2,3-dihydroquinazolin-4(1H)-one

$^1\text{H-NMR}$  (300 MHz, DMSO- $d_6$ ):  $\delta = 8.24$  (*s*, 1H, NH(3)), 7.51 – 7.46 (*m*, 2H, CH(10 + 14)), 7.44 – 7.26 (*m*, 4H, CH(5 + 11 + 12 + 13)), 7.07 (*dd*, 1H,  $^3J = 8.2$  Hz,  $^4J = 1.9$  Hz, CH(7)), 6.92 (*s*, 1H, NH(1)), 6.66 (*d*, 1H,  $^3J = 8.2$  Hz, CH(8)), 5.70 (*dd*, 1H,  $^3J = 1.9$  Hz, CH(2)), 2.18 (*s*, 3H, CH<sub>3</sub>) ppm;  $^{13}\text{C-NMR}$  (75 MHz, DMSO- $d_6$ ):  $\delta = 163.7$  (C=O(4)), 145.7 ( $\text{C}_{\text{quart}}(8a)$ ), 141.7 ( $\text{C}_{\text{quart}}(9)$ ), 134.1 ( $\text{C}_{\text{quart}}(6)$ ), 128.4 (CH(12)), 128.3 (CH(11 + 13)), 127.2 (CH(5)), 126.9 (CH(10 + 14)), 125.8 (CH(7)), 115.0 ( $\text{C}_{\text{quart}}(4a)$ ), 114.6 (CH(8)), 66.7 (CH(2)), 20.1 (CH<sub>3</sub>) ppm; MS: (EI, 70 eV)  $m/z$  (%) = 238 ([M] $^+$ , 25), 237 (30), 236 (11), 162 (10), 161 (100), 134 (35), 133 (26), 106 (17), 79 (10), 78 (14), 77 (36), 51 (18).

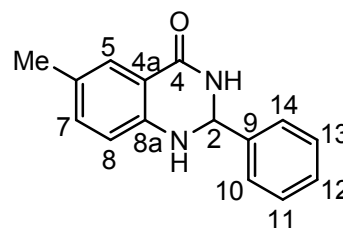

### 2-Phenyl-6,7-dimethoxy-2,3-dihydroquinazolin-4(1H)-one

$^1\text{H-NMR}$  (400 MHz, DMSO- $d_6$ ):  $\delta = 8.05$  (*s*, 1H, NH(3)), 7.53 – 7.45 (*m*, 2H, CH(10 + 14)), 7.43 – 7.29 (*m*, 3H, CH(11 + 12 + 13)), 7.11 (*s*, 1H, CH(5)), 6.79 (*s*, 1H, NH(1)), 6.37 (*s*, 1H, CH(8)), 5.68 (*dd*,  $^3J = 1.9$  Hz,  $^3J = 1.9$  Hz, CH(2)), 3.72 (*s*, 3H, OMe), 3.67 (*s*, 3H, OMe) ppm;  $^{13}\text{C-NMR}$  (101 MHz, DMSO- $d_6$ ):  $\delta = 163.8$  (C=O(4)), 153.9 ( $\text{C}_{\text{quart}}(7)$ ), 143.6 ( $\text{C}_{\text{quart}}(8a)$ ), 141.7 ( $\text{C}_{\text{quart}}(9)$ ), 141.5 ( $\text{C}_{\text{quart}}(6)$ ), 128.4 (CH(12)), 128.2 (CH(11 + 13)), 126.8 (CH(10 + 14)), 109.8 ( $\text{C}_{\text{quart}}(4a)$ ), 106.6 (CH(5)), 97.9 (CH(8)), 66.9 (CH(2)), 55.8 (C(OMe)), 55.4 (C(OMe)) ppm; MS: (EI, 70 eV)  $m/z$  (%) = 285 (13), 284 ([M] $^+$ , 61), 283 (35), 282 (31), 267 (29), 208 (16), 207 (100), 191 (12), 180 (39), 179 (23), 164 (21), 152 (10), 136 (24), 106 (14), 104 (27), 77 (26), 51 (13).

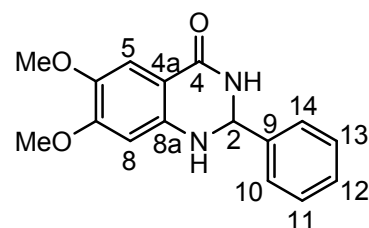

### 2-Phenyl-2,3-dihydropyrido[2,3-d]pyrimidin-4(1H)-one

$^1\text{H-NMR}$  (300 MHz, DMSO- $d_6$ ):  $\delta = 8.60$  (*s*, 1H, NH(3)), 8.14 (*dd*, 1H,  $^3J = 4.9$  Hz,  $^4J = 2.0$  Hz, CH(7)), 8.01 (*s*, 1H, NH(1)), 7.90 (*dd*, 1H,  $^3J = 7.5$ ,  $^4J = 2.0$  Hz, CH(5)), 7.62 – 7.14 (*m*, 5H, CH(10 + 11 + 12 + 13 + 14)), 6.70 (*dd*, 1H,  $^3J = 7.5$  Hz,  $^3J = 4.9$  Hz, CH(6)), 5.83 (*dd*, 1H,  $^3J = 2.5$  Hz,  $^3J = 2.5$  Hz, CH(2)) ppm;  $^{13}\text{C-NMR}$  (75 MHz, DMSO- $d_6$ ):  $\delta = 162.8$  (C=O(4)), 157.5 ( $\text{C}_{\text{quart}}(8a)$ ), 152.9 (CH(7)), 142.3 ( $\text{C}_{\text{quart}}(9)$ ), 135.7 (CH(5)), 128.4 (CH(12)), 128.3 (CH(11 + 13)), 126.3 (CH(10 + 14)), 113.8 (CH(6)), 109.5 ( $\text{C}_{\text{quart}}(4a)$ ), 65.1 (CH(2)) ppm; MS: (EI, 70 eV)  $m/z$  (%) = 225 ([M] $^+$ , 14), 224 (26), 148 (100), 121 (27), 93 (28), 77 (17), 51 (14).

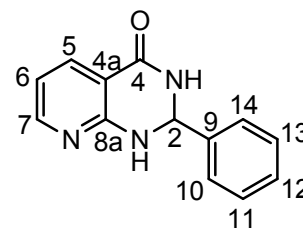

### 2-Cyclohexyl-2,3-dihydroquinazolin-4(1H)-one

$^1\text{H-NMR}$  (400 MHz, DMSO- $d_6$ ):  $\delta = 7.87$  (*s*, 1H, NH(3)), 7.55 (*dd*, 1H,  $^3J = 7.7$  Hz,  $^4J = 1.6$  Hz, CH(5)), 7.23 – 7.16 (*m*, 1H, CH(7)), 6.74 (*dd*, 1H,  $^3J = 8.2$  Hz,  $^4J = 1.1$  Hz, CH(8)), 6.60 (*ddd*, 1H,  $^3J = 7.4$  Hz,  $^3J = 7.3$  Hz,  $^4J = 1.1$  Hz, CH(6)), 6.55 (*s*, 1H, NH(1)), 4.44 (*ddd*, 1H,  $^3J = 4.2$  Hz,  $^3J = 1.9$  Hz,  $^3J = 1.9$  Hz, CH(2)), 1.77– 1.04 (*m*, 11H, CH<sub>2</sub>(Cy)) ppm;  $^{13}\text{C-NMR}$  (101 MHz, DMSO- $d_6$ ):  $\delta = 163.7$  (C=O(4)), 148.3 ( $\text{C}_{\text{quart}}(8a)$ ), 133.0 (CH(7)), 127.2 (CH(5)), 116.4 (CH(6)), 114.8 ( $\text{C}_{\text{quart}}(4a)$ ), 114.1 (CH(8)), 68.6 (CH(2)), 42.9 (CH<sub>2</sub>(Cy)), 27.0 (CH<sub>2</sub>(Cy)), 26.7 (CH<sub>2</sub>(Cy)), 25.9 (CH<sub>2</sub>(Cy)), 25.6 (CH<sub>2</sub>(Cy)), 25.6 (CH<sub>2</sub>(Cy)) ppm; MS: (EI, 70 eV)  $m/z$  (%) = 148 (10), 147 (100), 92 (10).

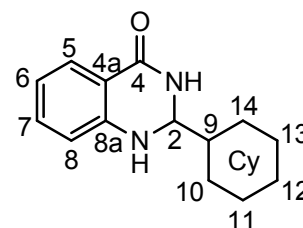

### 2-Isopropyl-2,3-dihydroquinazolin-4(1H)-one

$^1\text{H-NMR}$  (400 MHz, DMSO- $d_6$ ):  $\delta = 7.86$  (*s*, 1H, NH(3)), 7.57 (*dd*,  $^3J = 7.8$  Hz,  $^4J = 1.6$  Hz, 1H, CH(5)), 7.20 (*ddd*, 1H,  $^3J = 8.5$  Hz,  $^3J = 7.2$  Hz,  $^4J = 1.7$  Hz, CH(7)), 6.75 (*dd*, 1H,  $^3J = 8.2$  Hz,  $^4J = 1.0$  Hz, CH(8)), 6.62 (*ddd*, 1H,  $^3J = 7.5$  Hz,  $^3J = 7.4$  Hz,  $^4J = 1.1$  Hz, CH(6)), 6.51 (*s*, 1H, NH(1)), 4.54 – 4.49 (*m*, 1H, CH(2)), 1.86 (*m*, 1H, CH(9)), 0.94 (*d*,  $^3J = 6.9$  Hz, 3H, CH<sub>3</sub>), 0.92 (*d*,  $^3J = 6.8$  Hz, 3H, CH<sub>3</sub>) ppm;  $^{13}\text{C-NMR}$  (101 MHz, DMSO- $d_6$ ):  $\delta = 163.9$  (C=O(4)), 148.5 ( $\text{C}_{\text{quart}}(8a)$ ), 133.0 (CH(7)), 127.2 (CH(5)), 116.5 (CH(6)), 114.7 ( $\text{C}_{\text{quart}}(4a)$ ), 114.1 (CH(8)), 69.2 (CH(2)), 32.7 (CH(9)), 16.9 (CH<sub>3</sub>), 16.6 (CH<sub>3</sub>) ppm; MS: (EI, 70 eV)  $m/z$  (%) = 147 (100), 92 (11), 65 (8).

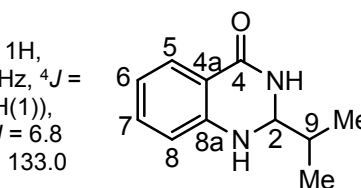

### 2-(4-Isopropylphenyl)-2,3-dihydroquinazolin-4(1H)-one

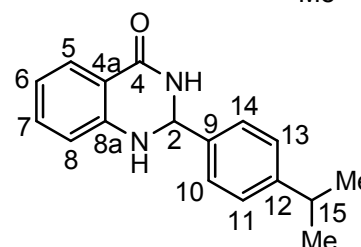

<sup>1</sup>H-NMR (400 MHz, DMSO-*d*<sub>6</sub>): δ = 8.21 (s, 1H, NH(3)), 7.61 (*dd*, 1H, <sup>3</sup>*J* = 7.8 Hz, <sup>4</sup>*J* = 1.6 Hz, 1H, CH(5)), 7.46 – 7.37 (*m*, 2H, CH(10 + 14)), 7.32 – 7.18 (*m*, 3H, CH(11 + 13 + 7)), 7.05 (s, 1H, NH(1)), 6.79 – 6.70 (*m*, 1H, CH(8)), 6.71 – 6.63 (*m*, 1H, CH(6)), 5.76 – 5.67 (*m*, 1H, CH(2)), 2.88 (*h*, 1H, <sup>3</sup>*J* = 6.9 Hz, CH(15)), 1.19 (*d*, 6H, <sup>3</sup>*J* = 6.9 Hz, CH<sub>3</sub>) ppm; <sup>13</sup>C-NMR (75 MHz, DMSO-*d*<sub>6</sub>): δ = 163.7 (C=O(7)), 148.8 (C<sub>quart</sub>(12)), 148.0 (C<sub>quart</sub>(9)), 139.0 (C<sub>quart</sub>(8a)), 133.3 (CH(7)), 127.4 (CH(5)), 127.0 (CH(11 + 13)), 126.3 (CH(10 + 14)), 117.1 (CH(6)), 115.0 (C<sub>quart</sub>(4a)), 114.4 (CH(8)), 66.6 (CH(2)), 33.26 (CH(15)), 23.9 (CH<sub>3</sub>) ppm; MS: (EI, 70 eV) *m/z* (%) = 266 ([M]<sup>+</sup>, 28), 265 (53), 249 (13), 148 (12), 147 (100), 120 (46), 119 (13), 92 (27), 91 (10), 77 (12), 65 (12).

#### Crystal data and structure refinement for 2-(4-isopropylphenyl)-2,3-dihydroquinazolin-4(1*H*)-one

|                                   |                                                                                                                             |
|-----------------------------------|-----------------------------------------------------------------------------------------------------------------------------|
| Empirical formula                 | C <sub>17</sub> H <sub>18</sub> N <sub>2</sub> O                                                                            |
| Formula weight                    | 266.33                                                                                                                      |
| Temperature                       | 150(2) K                                                                                                                    |
| Wavelength                        | 1.54178 Å                                                                                                                   |
| Crystal system                    | monoclinic                                                                                                                  |
| Space group (H.M.)                | <i>P</i> 2 <sub>1</sub> / <i>c</i>                                                                                          |
| Unit cell dimensions              | <i>a</i> = 13.7868(3) Å    α = 90.00°<br><i>b</i> = 9.5016(2) Å    β = 104.522(1)°<br><i>c</i> = 10.9971(3) Å    γ = 90.00° |
| Volume                            | 1394.56(6) Å <sup>3</sup>                                                                                                   |
| Z                                 | 4                                                                                                                           |
| Density (calculated)              | 1.269 Mg/m <sup>3</sup>                                                                                                     |
| Absorption coefficient            | 0.628 mm <sup>-1</sup>                                                                                                      |
| F(000)                            | 568                                                                                                                         |
| Crystal size                      | 0.44 x 0.42 x 0.08 mm <sup>3</sup>                                                                                          |
| θ range for data collection       | 3.31 to 63.68°                                                                                                              |
| Index ranges                      | -16 ≤ <i>h</i> ≤ 14, -6 ≤ <i>k</i> ≤ 11, -12 ≤ <i>l</i> ≤ 12                                                                |
| Reflections collected             | 9161                                                                                                                        |
| Independent reflections           | 2282 [R(int) = 0.0225]                                                                                                      |
| Absorption correction             | Semi-empirical from equivalents                                                                                             |
| Max. and min. transmission        | 1.000 and 0.903                                                                                                             |
| Refinement method                 | Full-matrix least squares on F <sup>2</sup>                                                                                 |
| Data / restraints / parameters    | 2282 / 0 / 191                                                                                                              |
| Goodness-of-fit on F <sup>2</sup> | 1.042                                                                                                                       |
| Final R indices [I > 2σ(I)]       | R1 = 0.0329, wR2 = 0.0857                                                                                                   |
| R indices (all data)              | R1 = 0.0349, wR2 = 0.0878                                                                                                   |

#### 2-(3,4-Dichlorophenyl)-2,3-dihydroquinazolin-4(1*H*)-one

<sup>1</sup>H-NMR (400 MHz, DMSO-*d*<sub>6</sub>): δ = 8.42 (s, 1H, NH(3)), 7.72 (*d*, 1H, <sup>4</sup>*J* = 2.0 Hz, CH(14)), 7.66 (*d*, 1H, <sup>3</sup>*J* = 8.3 Hz, CH(11)), 7.61 (*dd*, 1H, <sup>3</sup>*J* = 7.7 Hz, <sup>4</sup>*J* = 1.6 Hz, CH(5)), 7.47 (*dd*, 1H, <sup>3</sup>*J* = 8.3 Hz, <sup>4</sup>*J* = 2.1 Hz, CH(7)), 7.29 – 7.22 (*m*, 2H, NH(1) + CH(10)), 6.79 – 6.74 (*m*, 1H, CH(8)), 6.72 – 6.65 (*m*, 1H, CH(6)), 5.80 (*dd*, 1H, <sup>3</sup>*J* = 2.3 Hz, <sup>3</sup>*J* = 2.3 Hz, CH(2)) ppm; <sup>13</sup>C-NMR (101 MHz, DMSO-*d*<sub>6</sub>): δ = 163.4 (C=O(4)), 147.3 C<sub>quart</sub>(8a), 143.0 (C<sub>quart</sub>(9)), 133.5 (CH(7)), 130.9 (C<sub>quart</sub>(13)), 130.8 (C<sub>quart</sub>(12)), 130.6 (CH(11)), 128.9 (CH(5)), 127.4 (CH(14)), 127.0 (CH(10)), 117.5 (CH(6)), 114.9 (C<sub>quart</sub>(4a)), 114.5 (CH(8)), 65.0 (CH(2)) ppm; MS: (EI, 70 eV) *m/z* (%) = 294 (10), 293 (12), 292 ([M]<sup>+</sup>, 15), 291 (16), 148 (10), 147 (100), 120 (44), 119 (21), 92 (30), 65 (12).

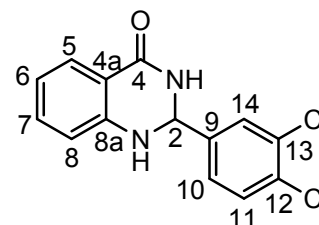

#### 2-(4-(Dimethylamino)phenyl)-2,3-dihydroquinazolin-4(1*H*)-one

<sup>1</sup>H-NMR (400 MHz, DMSO-*d*<sub>6</sub>): δ = 8.07 (s, 1H, NH(3)), 7.61 (*dd*, <sup>3</sup>*J* = 7.7 Hz, <sup>4</sup>*J* = 1.6 Hz, 1H, CH(5)), 7.33 – 7.27 (*m*, 2H, CH(10 + 14)), 7.22 (*ddd*, 1H, <sup>3</sup>*J* = 7.9 Hz, <sup>3</sup>*J* = 7.1 Hz, <sup>4</sup>*J* = 1.6 Hz, CH(7)), 6.91 (s, 1H, NH(1)), 6.75 – 6.69 (*m*, 3H, CH(8 + 11 + 13)), 6.69 – 6.63 (*m*, 1H, CH(6)), 5.65 – 5.62 (*m*, 1H, CH(2)), 3.34 (s, 6H, CH<sub>3</sub>) ppm; <sup>13</sup>C-NMR (101 MHz, DMSO-*d*<sub>6</sub>): δ = 163.8 (C=O(4)), 150.7 (C<sub>quart</sub>(9)), 148.2 (C<sub>quart</sub>(8a)), 133.1 (CH(7)), 128.7 (CH(5)), 127.7 (C<sub>quart</sub>(12)), 127.3 (CH(10 + 14)), 116.9 (CH(6)), 115.0 (C<sub>quart</sub>(4a)), 114.4 (CH(8)), 111.9 (CH(11 + 13)), 66.6 (CH(2)), 40.16 (CH<sub>3</sub>) ppm; MS: (EI, 70 eV) *m/z* (%) = 266 ([M-H]<sup>+</sup>, 18), 265 (100), 264 (45), 146 (21), 145 (18), 119 (18).

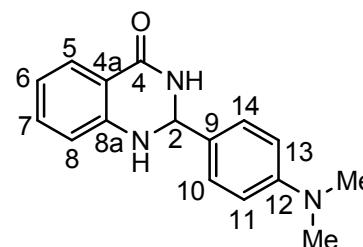

#### 2-(Pyridin-3-yl)-2,3-dihydroquinazolin-4(1*H*)-one

<sup>1</sup>H-NMR (300 MHz, DMSO-*d*<sub>6</sub>): δ = 8.66 (*d*, 1H, <sup>4</sup>*J* = 2.3 Hz, CH(10)), 8.55 (*dd*, <sup>3</sup>*J* = 4.8 Hz, <sup>4</sup>*J* = 1.7 Hz, CH(12)), 8.40 (s, 1H, NH(3)), 7.89 (*dd*, <sup>3</sup>*J* = 8.0 Hz, <sup>4</sup>*J* = 2.0 Hz, CH(14)), 7.63 (*dd*, 1H, <sup>3</sup>*J* = 7.8 Hz, <sup>4</sup>*J* = 1.6 Hz, CH(5)), 7.43 (*ddd*, 1H, <sup>3</sup>*J* = 8.0 Hz, <sup>3</sup>*J* = 4.8 Hz, <sup>4</sup>*J* = 0.9 Hz, CH(13)), 7.27 (*ddd*, 1H, <sup>3</sup>*J* = 8.5 Hz, <sup>3</sup>*J* = 7.2 Hz, <sup>4</sup>*J* = 1.6 Hz, CH(7)), 7.18 (s, 1H,

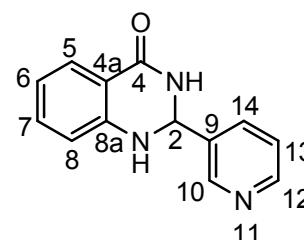

NH(1)), 6.84 – 6.66 (*m*, 2H, CH(8 + 6)), 5.85 (*dd*, 1H,  $^3J = 1.8$  Hz,  $^3J = 1.8$  Hz, CH(2)) ppm;  $^{13}\text{C-NMR}$  (101 MHz, DMSO- $d_6$ ):  $\delta = 163.6$  (C=O(4)), 149.7 (CH(10), 148.4 (CH(12)), 147.7 ( $\text{C}_{\text{quart}}$ (8a)), 136.8 CH(14)), 134.7 ( $\text{C}_{\text{quart}}$ (9)), 133.6 (CH(7)), 127.4 (CH(5)), 123.6 (CH(13)), 117.6 (CH(6)), 115.0 ( $\text{C}_{\text{quart}}$ (4a)), 114.6 (CH(4)), 64.7 (CH(2)) ppm; MS: (EI, 70 eV) *m/z* (%) = 225 ( $[\text{M}]^+$ , 15), 242 (12), 148 (11), 147 (100), 120 (35), 119 (19), 92 (31), 65 (14), 64 (11), 63 (11), 51 (18).

### 2-(4-(Trifluoromethoxy)phenyl)-2,3-dihydroquinazolin-4(1H)-one

$^1\text{H-NMR}$  (300 MHz, DMSO- $d_6$ ):  $\delta = 8.37$  (*s*, 1H, NH(3)), 7.68 – 7.60 (*m*, 3H, CH(5 + 10 + 14)), 7.40 (*ddd*, 2H,  $^3J = 7.8$  Hz,  $^3J = 2.1$  Hz,  $^5J = 1.1$  Hz, CH(11 + 13)), 7.26 (*ddd*, 1H,  $^3J = 8.1$  Hz,  $^3J = 7.2$  Hz,  $^4J = 1.6$  Hz, CH(7)), 7.18 (*s*, 1H, NH(1)), 6.77 (*dd*, 1H,  $^3J = 8.2$  Hz,  $^4J = 1.0$  Hz, CH(8)), 6.74 – 6.66 (*m*, 1H, CH(6)), 5.83 (*dd*, 1H,  $^3J = 1.9$  Hz,  $^3J = 1.9$  Hz, CH(2)) ppm;  $^{13}\text{C-NMR}$  (75 MHz, DMSO- $d_6$ ):  $\delta = 163.6$  (C=O(4)), 148.4 (*d*,  $^3J = 1.7$  Hz,  $\text{C}_{\text{quart}}$ (12)), 147.7 ( $\text{C}_{\text{quart}}$ (8a)), 141.0 ( $\text{C}_{\text{quart}}$ (9)), 133.5 (CH(7)), 129.0 (CH(10 + 14)), 127.4 (CH(5)), 121.02 (CH(11 + 13)), 120.11 (*q*,  $^1J = 256.3$  Hz,  $\text{OCF}_3$ ), 117.4 (CH(6)), 114.9 ( $\text{C}_{\text{quart}}$ (4a)), 114.5 (CH(8)), 65.9 (CH(2)) ppm;  $^{19}\text{F-NMR}$  (282 MHz, DMSO- $d_6$ ):  $\delta = -56.47$  (*s*,  $\text{OCF}_3$ ) ppm; MS: (EI, 70 eV) *m/z* (%) = 308 ( $[\text{M}]^+$ , 32), 307 (45), 188 (10), 148 (10), 147 (100), 120 (63), 119 (27), 95 (10), 92 (44), 91 (10), 69 (24), 65 (20), 64 (16), 63 (15).

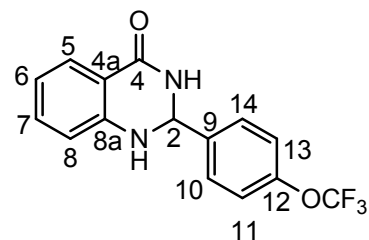

### 2-(4-Methoxyphenyl)-2,3-dihydroquinazolin-4(1H)-one

$^1\text{H-NMR}$  (300 MHz, DMSO- $d_6$ ):  $\delta = 8.21$  (*s*, 1H, NH(3)), 7.62 (*dd*, 1H,  $^3J = 7.8$  Hz,  $^4J = 1.6$  Hz, CH(5)), 7.48 – 7.38 (*m*, 2H, CH(10 + 14)), 7.24 (*ddd*, 1H,  $^3J = 8.1$  Hz,  $^3J = 7.2$  Hz,  $^4J = 1.6$  Hz, CH(7)), 7.05 (*s*, 1H, NH(1)), 6.99 – 6.90 (*m*, 2H, CH(11 + 13)), 6.75 (*ddd*, 1H,  $^3J = 8.2$  Hz,  $^4J = 1.1$ ,  $^5J = 0.5$  Hz, CH(8)), 6.68 (*ddd*, 1H,  $^3J = 7.7$  Hz,  $^3J = 7.2$  Hz,  $^4J = 1.1$  Hz, CH(6)), 5.72 (*dd*, 1H,  $^3J = 1.7$  Hz,  $^3J = 1.7$  Hz, CH(2)), 3.74 (*s*, 3H, CH<sub>3</sub>) ppm;  $^{13}\text{C-NMR}$  (101 MHz, DMSO- $d_6$ ):  $\delta = 163.7$  (C=O(4)), 159.4 ( $\text{C}_{\text{quart}}$ (12)), 148.0 ( $\text{C}_{\text{quart}}$ (8a)), 133.5 (CH(7)), 133.3 ( $\text{C}_{\text{quart}}$ (9)), 128.2 (CH(10 + 14)), 127.4 (CH(5)), 117.1 (CH(6)), 115.0 ( $\text{C}_{\text{quart}}$ (4a)), 114.4 (CH(8)), 113.6 (CH(11 + 13)), 66.3 (CH(2)), 55.2 (OMe) ppm; MS: (EI, 70 eV) *m/z* (%) = 254 ( $[\text{M}]^+$ , 50), 253 (100), 252 (16), 147 (70), 134 (13), 120 (75), 119 (31), 92 (49), 91 (17), 77 (16), 65 (21), 64 (20), 63 (17).

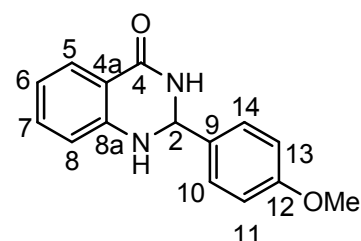

### 2-(4-Fluorophenyl)-2,3-dihydroquinazolin-4(1H)-one

$^1\text{H-NMR}$  (400 MHz, DMSO- $d_6$ ):  $\delta = 8.31$  (*s*, 1H, NH(3)), 7.63 (*dd*, 1H,  $^3J = 7.8$  Hz,  $^4J = 1.6$  Hz, CH(5)), 7.59 – 7.52 (*m*, 2H, CH(10 + 14)), 7.30 – 7.18 (*m*, 3H, CH(7 + 11 + 13)), 7.12 (*s*, 1H, NH(1)), 6.77 (*dd*, 1H,  $^3J = 8.2$  Hz,  $^4J = 1.0$  Hz, CH(8)), 6.69 (*ddd*, 1H,  $^3J = 7.5$  Hz,  $^3J = 7.4$  Hz,  $^4J = 1.0$  Hz, CH(6)), 5.79 (*dd*, 1H,  $^3J = 1.7$  Hz,  $^3J = 1.7$  Hz, CH(2)) ppm;  $^{13}\text{C-NMR}$  (101 MHz, DMSO- $d_6$ ):  $\delta = 163.6$  (C=O(4)), 162.1 (*d*,  $^1J = 244.1$  Hz,  $\text{C}_{\text{quart}}$ (12)), 147.8 ( $\text{C}_{\text{quart}}$ (8a)), 137.8 (*d*,  $^4J = 2.9$  Hz,  $\text{C}_{\text{quart}}$ (9)), 133.4 (CH(7)), 129.1 (*d*,  $^3J = 8.3$  Hz, CH(10 + 14)), 127.4 (CH(5)), 117.3 (CH(6)), 115.1 (*d*,  $^2J = 21.5$  Hz, CH(11 + 13)), 115.0 ( $\text{C}_{\text{quart}}$ (4a)), 114.5 (CH(8)), 66.0 (CH(2)) ppm;  $^{19}\text{F-NMR}$  (282 MHz, DMSO- $d_6$ ):  $\delta = -112.44$  –  $-114.78$  (*m*, CF) ppm; MS: (EI, 70 eV) *m/z* (%) = 242 ( $[\text{M}]^+$ , 32), 241 (45), 148 (10), 147 (100), 122 (11), 120 (76), 119 (23), 95 (12), 92 (40), 65 (17), 64 (11).

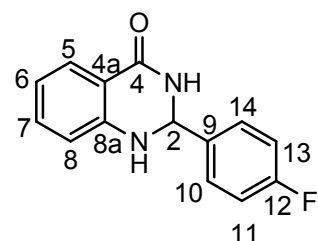

### 2-(4-cyanophenyl)-2,3-dihydroquinazolin-4(1H)-one

$^1\text{H-NMR}$  (300 MHz, DMSO- $d_6$ ):  $\delta = 8.49$  – 8.44 (*m*, 1H, NH(3)), 7.90 – 7.82 (*m*, 2H, ), 7.68 – 7.63 (*m*, 2H), 7.60 (*dd*, 1H,  $^3J = 7.7$  Hz,  $^4J = 1.6$  Hz, CH(5)), 7.33 – 7.20 (*m*, 2H, CH(7) + NH(1)), 6.75 (*dd*, 1H,  $^3J = 8.1$  Hz,  $^4J = 1.1$  Hz, CH(8)), 6.68 (*ddd*, 1H,  $^3J = 7.5$  Hz,  $^3J = 7.5$  Hz,  $^4J = 1.1$  Hz, CH(6)), 5.84 (*dd*, 1H,  $^3J = 2.4$  Hz,  $^3J = 2.4$  Hz, CH(2));  $^{13}\text{C-NMR}$  (75 MHz, DMSO):  $\delta = 163.3$  (C=O(4)), 147.4 ( $\text{C}_{\text{quart}}$ (9)), 147.3 ( $\text{C}_{\text{quart}}$ (8a)), 133.6 (CH(7)), 132.4 (CH(10 + 14)), 127.7 (11 + 13), 127.4 (CH(5)), 118.7 (CN(15)), 117.4 (CH(6)), 114.9 ( $\text{C}_{\text{quart}}$ (4a)), 114.5 (CH(8)), 111.1 ( $\text{C}_{\text{quart}}$ (12)), 65.5 (CH(2)); MS: (EI, 70 eV) *m/z* (%) = 249 ( $[\text{M}]^+$ , 18), 248 (18), 148 (10), 147 (100), 120 (40), 119 (20), 102 (10), 92 (25), 65 (10).

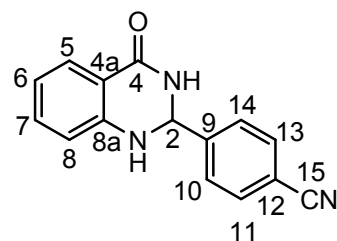

### 2-(4-(Trifluoromethyl)phenyl)-2,3-dihydroquinazolin-4(1H)-one

$^1\text{H-NMR}$  (400 MHz, DMSO- $d_6$ ):  $\delta = 8.44$  (*m*, 1H, NH(3)), 7.77 (*d*, 2H,  $^3J = 8.3$  Hz, CH(11 + 13)), 7.71 (*d*, 1H,  $^3J = 8.2$  Hz, CH(10 + 14)), 7.62 (*dd*, 1H,  $^3J = 7.8$  Hz,  $^4J = 1.6$  Hz, CH(5)), 7.31 – 7.20 (*m*, 2H, CH(7) + NH(1)), 6.76 (*dd*, 1H,  $^3J = 8.2$  Hz,  $^4J = 1.0$  Hz, CH(8)), 6.69 (*ddd*, 1H,  $^3J = 8.1$  Hz,  $^3J = 7.3$  Hz,  $^4J = 1.1$  Hz, CH(6)), 5.87 (*dd*, 1H,  $^3J = 2.2$  Hz,  $^3J = 2.2$  Hz, CH(2)) ppm;  $^{13}\text{C-NMR}$  (101 MHz, DMSO- $d_6$ ):  $\delta = 163.4$  (C=O(4)), 147.5 ( $\text{C}_{\text{quart}}$ (8a)), 146.4 ( $\text{C}_{\text{quart}}$ (9)), 133.5 (CH(7)), 128.9 (*q*,  $^2J = 31.6$  Hz, CH(12)), 127.7 (CH(10 + 14)), 127.4 (CH(5)), 125.31 (*q*,  $^3J = 3.7$  Hz, CH(11 + 13)), 124.16 (*q*,  $^1J = 272.2$

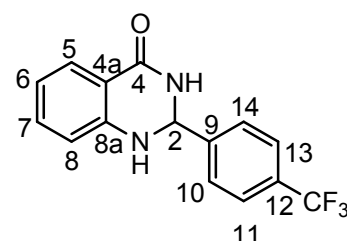

Hz, CF<sub>3</sub>), 117.4 (CH(6)), 114.9 (CH(4a)), 114.5 (CH(8)), 65.7 (CH(2)) ppm; <sup>19</sup>F-NMR (282 MHz, DMSO-*d*<sub>6</sub>): δ = -60.59 (CF<sub>3</sub>) ppm; MS: (EI, 70 eV) *m/z* (%) = 292 ([M]<sup>+</sup>, 23), 291 (24), 148 (10), 147 (100), 120 (43), 119 (20), 92 (27), 65 (10).

## 2-(Benzo[*b*]thiophen-3-yl)-2,3-dihydroquinazolin-4(1*H*)-one

<sup>1</sup>H-NMR (400 MHz, DMSO-*d*<sub>6</sub>): δ = 8.35 (s, 1H, NH(3)), 8.21 – 8.14 (*m*, 1H, CH(12)), 8.05 – 7.96 (*m*, 1H, CH(15)), 7.77 (s, 1H, CH(10)), 7.67 (*dd*, 1H, <sup>3</sup>*J* = 7.8 Hz, <sup>4</sup>*J* = 1.6 Hz, (CH(5))), 7.46 – 7.36 (*m*, 2H, CH(13 + 14)), 7.26 (*ddd*, 1H, <sup>3</sup>*J* = 8.3 Hz, <sup>3</sup>*J* = 7.2 Hz, <sup>4</sup>*J* = 1.6 Hz, (CH(7))), 7.14 (s, 1H, NH(1)), 6.77 (*dd*, 1H, <sup>3</sup>*J* = 8.2 Hz, <sup>4</sup>*J* = 1.0 Hz, CH(8)), 6.72 (*ddd*, 1H, <sup>3</sup>*J* = 7.5 Hz, <sup>4</sup>*J* = 1.0 Hz, CH(6)), 6.20 (*dd*, 1H, <sup>3</sup>*J* = 1.5 Hz, CH(2)) ppm; <sup>13</sup>C-NMR (101 MHz, DMSO): δ = 163.9 (C=O), 148.1 (C<sub>quart</sub>(8a)), 140.3 (C<sub>quart</sub>(9)), 136.8 (C<sub>quart</sub>(11a)), 135.4 (C<sub>quart</sub>(15a)), 133.3 (CH(7)), 127.5 (CH(5)), 126.6 (CH(13)), 124.6 (CH(14)), 124.0 CH(15), 123.5 (CH(10)), 123.0 (CH(12)), 117.3 CH(6), 115.1 (C<sub>quart</sub>(4a)), 114.5 (CH(8)), 62.6 (CH(2)) ppm; MS: (EI, 70 eV) *m/z* (%) = 281 (16), 280 ([M]<sup>+</sup>, 74), 279 (100), 160 (16), 147 (51), 134 (17), 120 (94), 119 (20), 92 (39), 89 (20), 95 (15), 63 (10).

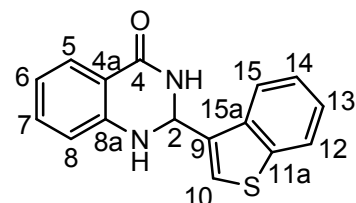

## 2-phenyl-quinazolinone

Experimental procedure:

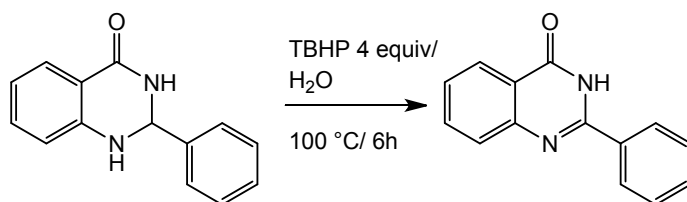

<sup>1</sup>H-NMR (300 MHz, DMSO-*d*<sub>6</sub>): δ = 12.55 (s, 1H, NH), 8.23 – 8.13 (*m*, 3H, CH(7 + 10 + 14)), 7.85 (*ddd*, <sup>3</sup>*J* = 8.5 Hz, <sup>3</sup>*J* = 7.0 Hz, <sup>3</sup>*J* = 1.6 Hz, CH(5)), 7.77 – 7.71 (*m*, 1H, CH(12)), 7.62 – 7.49 (*m*, 4H, CH(4 + 6 + 11 + 13)) ppm; <sup>13</sup>C-NMR (75 MHz, DMSO-*d*<sub>6</sub>): δ = 162.3 (C=O(4)), 152.4 (C<sub>quart</sub>(2)), 148.7 (C<sub>quart</sub>(8a)), 134.6 (CH(7)), 132.8 (C<sub>quart</sub>(9)), 131.4 (CH(12)), 128.6 (CH(10 + 14)), 127.8 (CH(11 + 13)), 127.4 CH(6), 126.6 (CH(7)), 125.8 (CH(5)), 121.0 (C<sub>quart</sub>(4a)) ppm; MS (EI, 70 eV): *m/z* (%) = 222 ([M]<sup>+</sup>, 100), 119 (99), 104 (11), 92 (14), 90 (17), 77 (22), 76 (11), 51 (10).

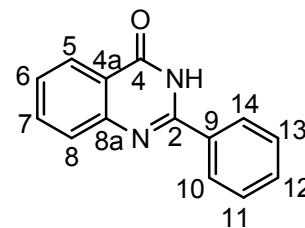

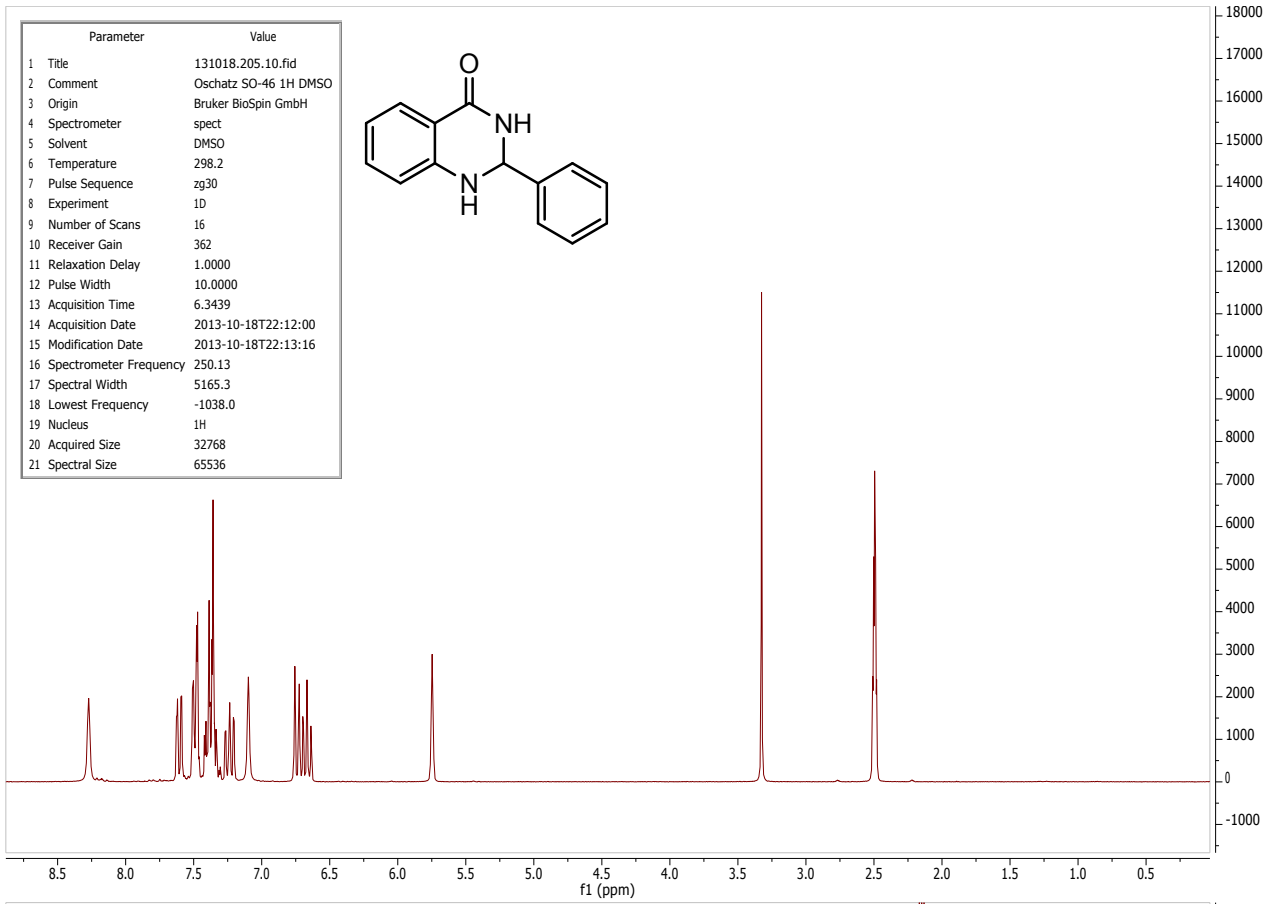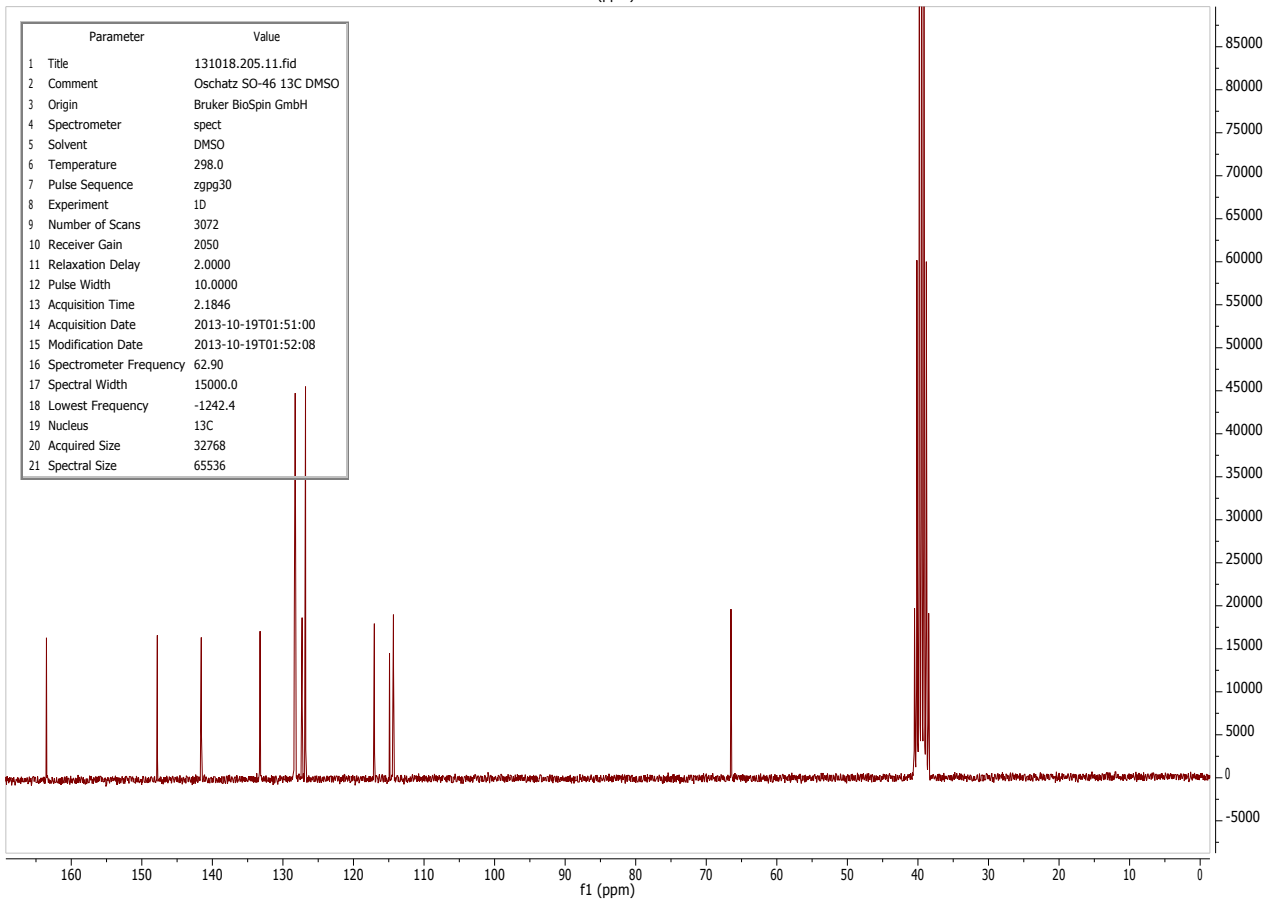

| Parameter                 | Value (f2, f1)          |
|---------------------------|-------------------------|
| 1 Title                   | 131018.205.13.ser       |
| 2 Comment                 | Oschatz SO-46 COSY DMSO |
| 3 Origin                  | Bruker BioSpin GmbH     |
| 4 Spectrometer            | spect                   |
| 5 Solvent                 | DMSO                    |
| 6 Temperature             | 298.1                   |
| 7 Pulse Sequence          | cosyppqf                |
| 8 Experiment              | COSY                    |
| 9 Number of Scans         | 4                       |
| 10 Receiver Gain          | 203                     |
| 11 Relaxation Delay       | 1.1977                  |
| 12 Pulse Width            | 10.0000                 |
| 13 Acquisition Time       | 0.5960                  |
| 14 Acquisition Date       | 2013-10-19T02:30:00     |
| 15 Modification Date      | 2013-10-19T02:46:10     |
| 16 Spectrometer Frequency | (250.13, 250.13)        |
| 17 Spectral Width         | (1718.2, 1718.2)        |
| 18 Lowest Frequency       | (490.5, 490.5)          |
| 19 Nucleus                | (1H, 1H)                |
| 20 Acquired Size          | (1024, 128)             |
| 21 Spectral Size          | (1024, 1024)            |

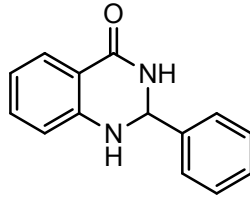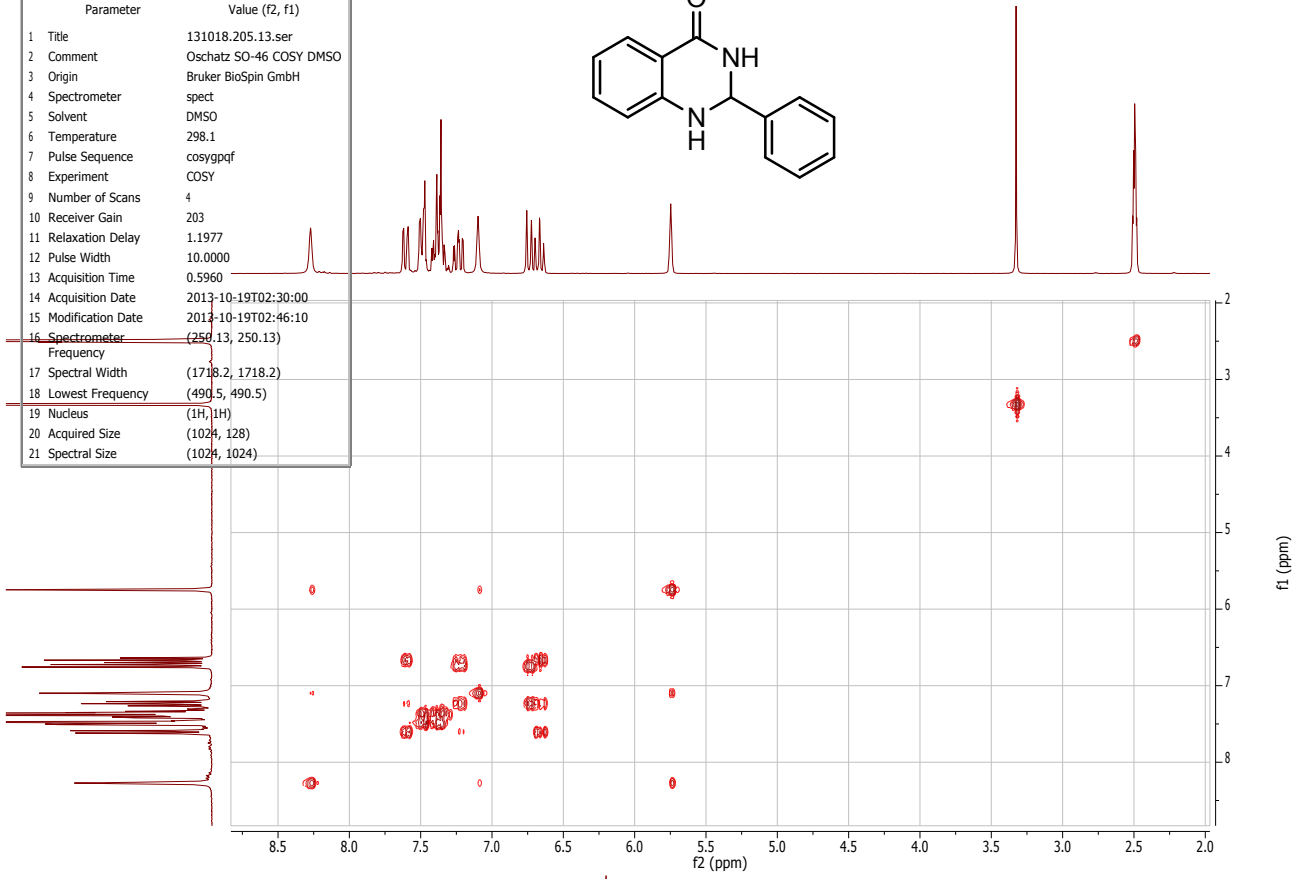

| Parameter                 | Value (f2, f1)           |
|---------------------------|--------------------------|
| 1 Title                   | 131018.205.14.ser        |
| 2 Comment                 | Oschatz SO-46 NOESY DMSO |
| 3 Origin                  | Bruker BioSpin GmbH      |
| 4 Spectrometer            | spect                    |
| 5 Solvent                 | DMSO                     |
| 6 Temperature             | 298.2                    |
| 7 Pulse Sequence          | noesyph                  |
| 8 Experiment              | NOESY                    |
| 9 Number of Scans         | 16                       |
| 10 Receiver Gain          | 203                      |
| 11 Relaxation Delay       | 1.8050                   |
| 12 Pulse Width            | 10.0000                  |
| 13 Acquisition Time       | 0.5960                   |
| 14 Acquisition Date       | 2013-10-19T02:48:00      |
| 15 Modification Date      | 2013-10-19T06:42:08      |
| 16 Spectrometer Frequency | (250.13, 250.13)         |
| 17 Spectral Width         | (1718.2, 1718.2)         |
| 18 Lowest Frequency       | (490.5, 490.5)           |
| 19 Nucleus                | (1H, 1H)                 |
| 20 Acquired Size          | (1024, 256)              |
| 21 Spectral Size          | (1024, 1024)             |

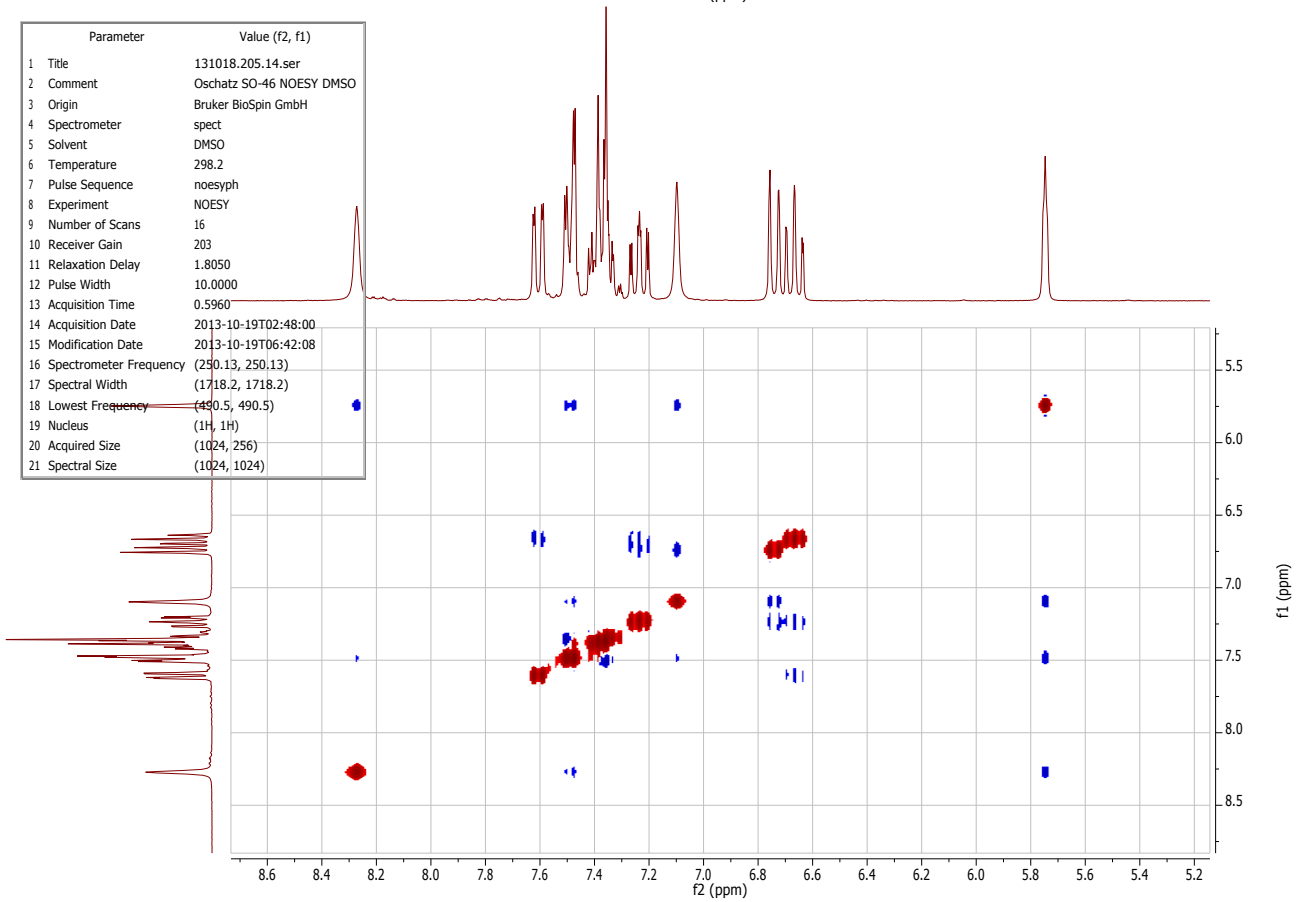



| Parameter                 | Value (f2, f1)          |
|---------------------------|-------------------------|
| 1 Title                   | 131018.205.15.ser       |
| 2 Comment                 | Oschatz SO-46 HSQC DMSO |
| 3 Origin                  | Bruker BioSpin GmbH     |
| 4 Spectrometer            | spect                   |
| 5 Solvent                 | DMSO                    |
| 6 Temperature             | 298.2                   |
| 7 Pulse Sequence          | hsqcetpsi2              |
| 8 Experiment              | HSQC                    |
| 9 Number of Scans         | 8                       |
| 10 Receiver Gain          | 2050                    |
| 11 Relaxation Delay       | 1.3556                  |
| 12 Pulse Width            | 10.0000                 |
| 13 Acquisition Time       | 0.2980                  |
| 14 Acquisition Date       | 2013-10-19T06:44:00     |
| 15 Modification Date      | 2013-10-19T07:41:06     |
| 16 Spectrometer Frequency | (250.13, 62.90)         |
| 17 Spectral Width         | (1718.2, 10416.7)       |
| 18 Lowest Frequency       | (490.5, -493.0)         |
| 19 Nucleus                | (1H, 13C)               |
| 20 Acquired Size          | (512, 256)              |
| 21 Spectral Size          | (512, 512)              |

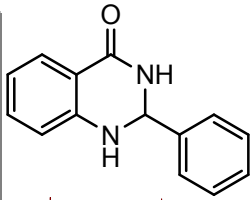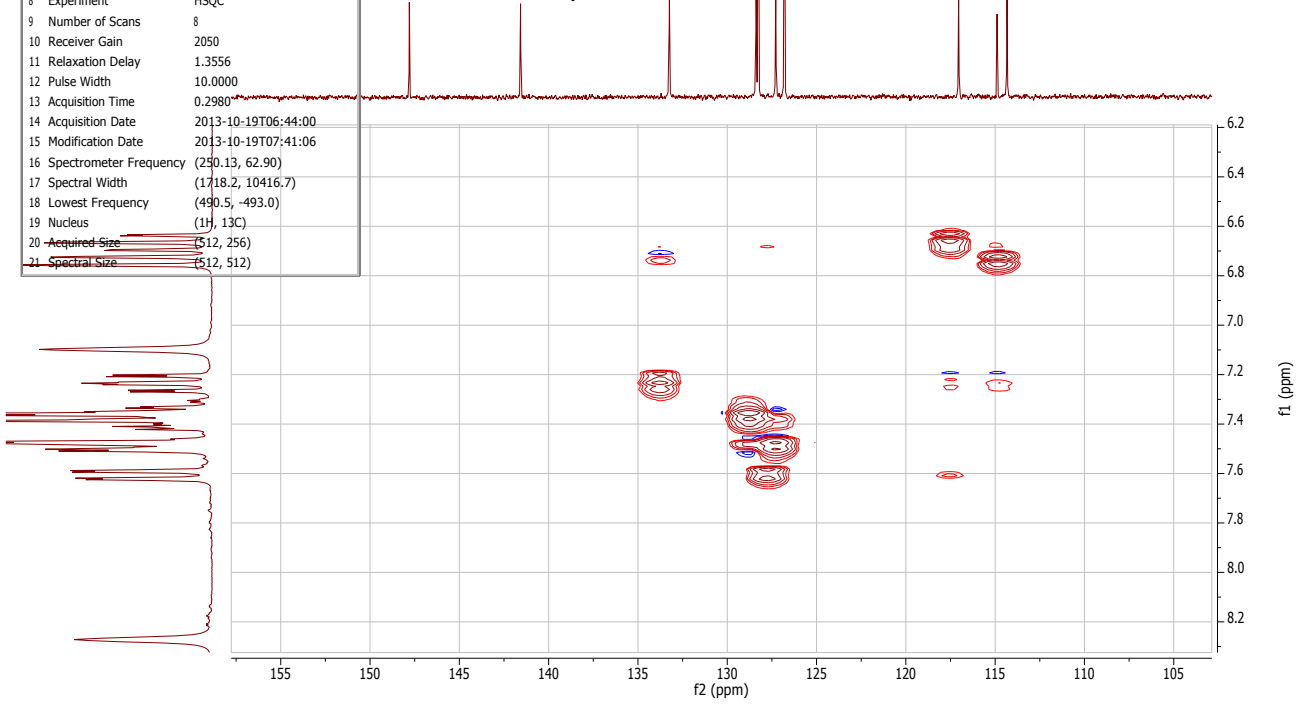

| Parameter                 | Value (f2, f1)          |
|---------------------------|-------------------------|
| 1 Title                   | 131018.205.16.ser       |
| 2 Comment                 | Oschatz SO-46 HMBC DMSO |
| 3 Origin                  | Bruker BioSpin GmbH     |
| 4 Spectrometer            | spect                   |
| 5 Solvent                 | DMSO                    |
| 6 Temperature             | 298.2                   |
| 7 Pulse Sequence          | hmbcgpndf               |
| 8 Experiment              | HMBC                    |
| 9 Number of Scans         | 64                      |
| 10 Receiver Gain          | 2050                    |
| 11 Relaxation Delay       | 0.9225                  |
| 12 Pulse Width            | 10.0000                 |
| 13 Acquisition Time       | 1.1920                  |
| 14 Acquisition Date       | 2013-10-19T07:45:00     |
| 15 Modification Date      | 2013-10-19T12:41:40     |
| 16 Spectrometer Frequency | (250.13, 62.90)         |
| 17 Spectral Width         | (1718.2, 13966.5)       |
| 18 Lowest Frequency       | (490.5, -704.2)         |
| 19 Nucleus                | (1H, 13C)               |
| 20 Acquired Size          | (2048, 128)             |
| 21 Spectral Size          | (2048, 512)             |

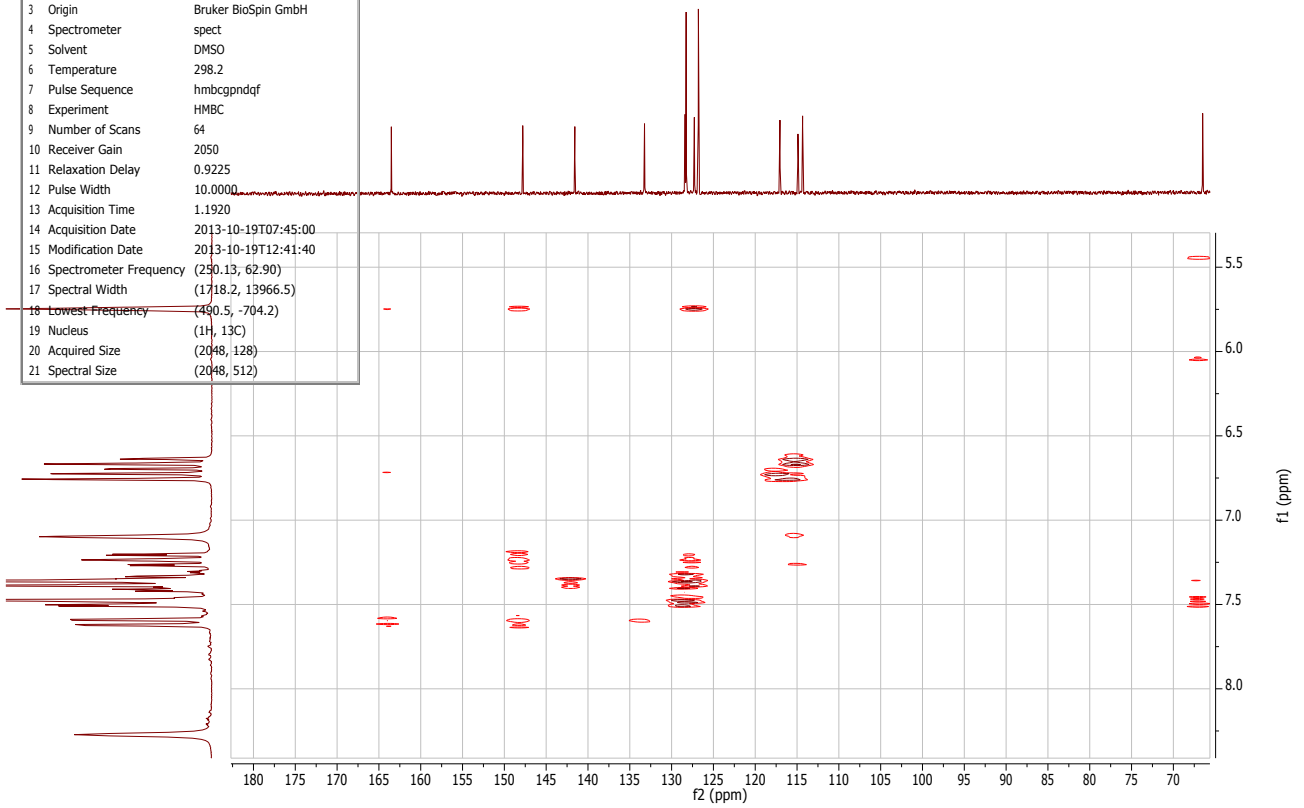

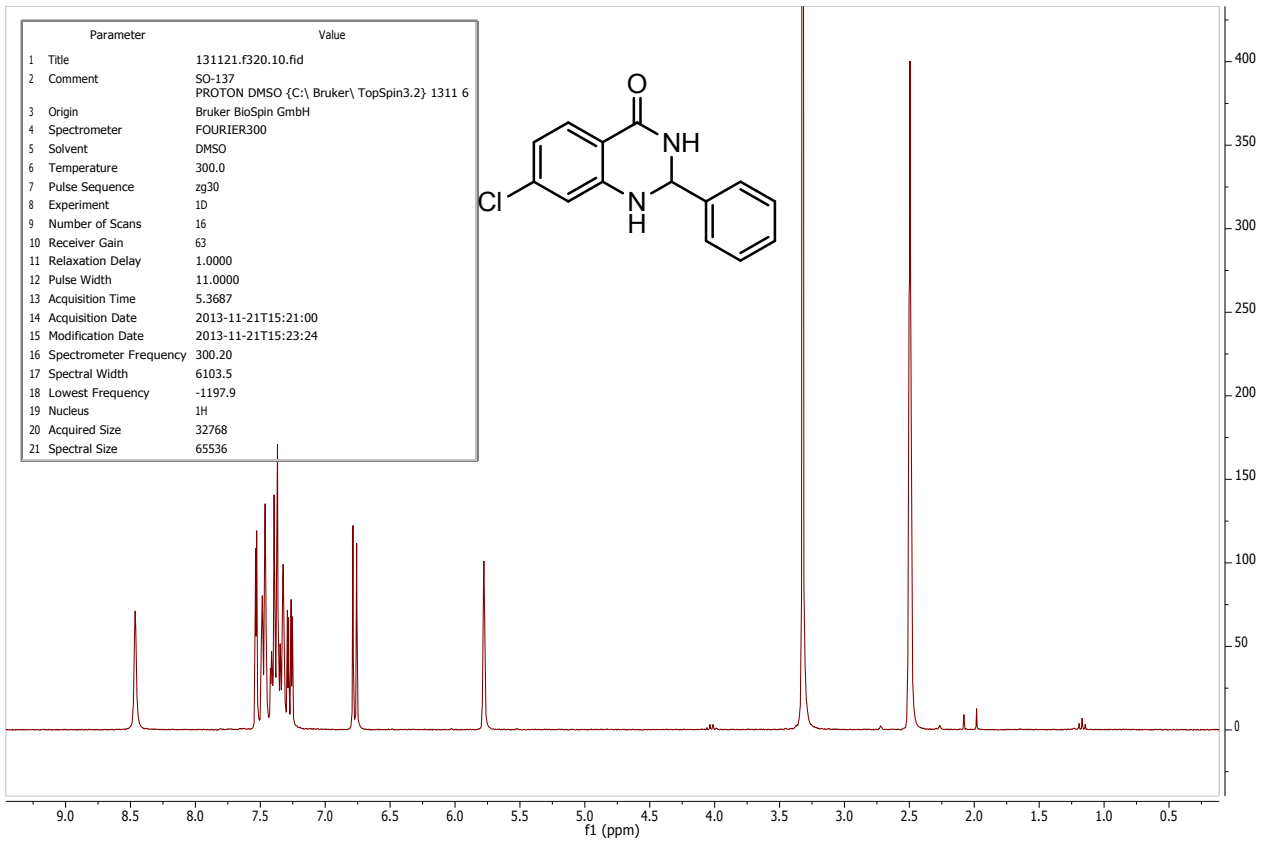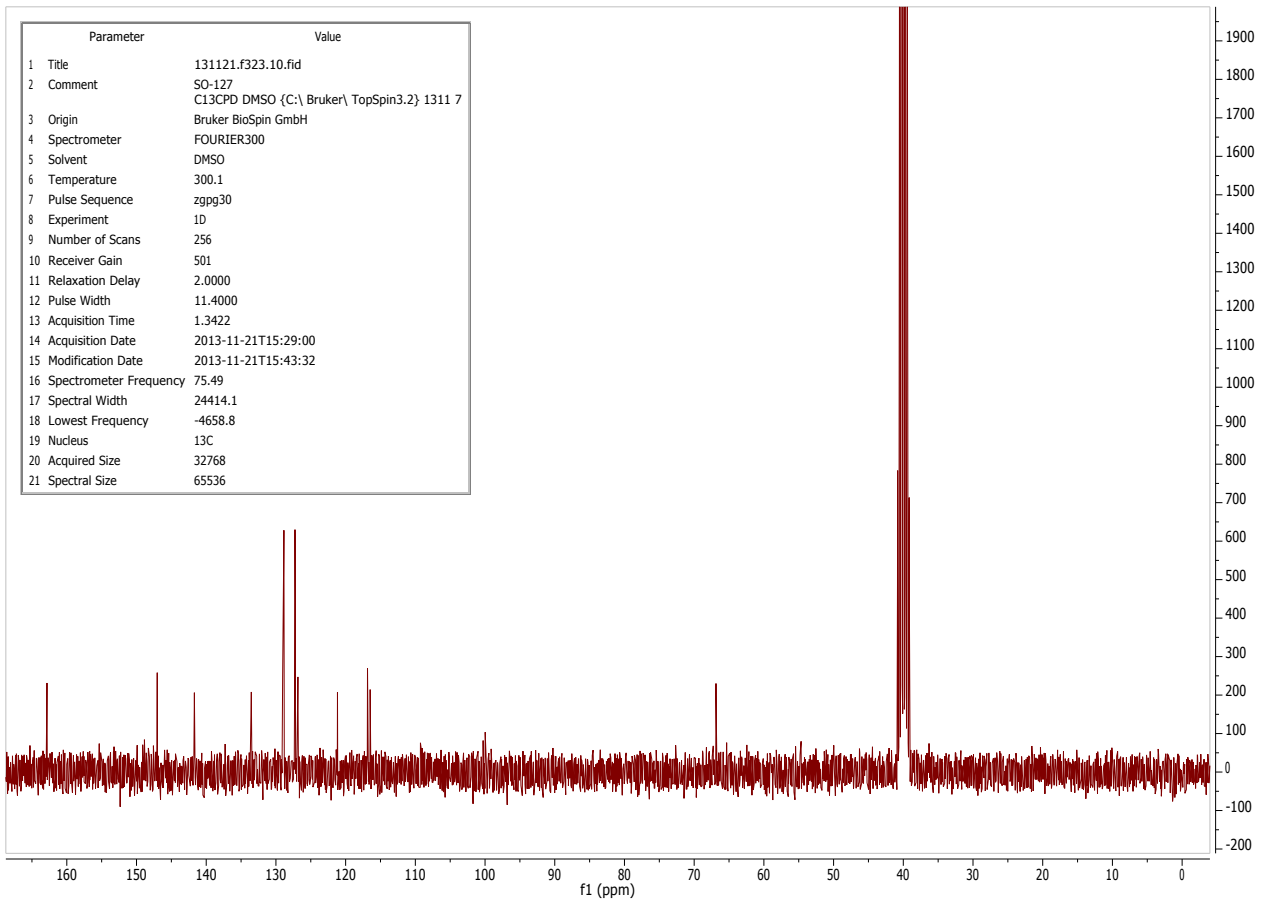

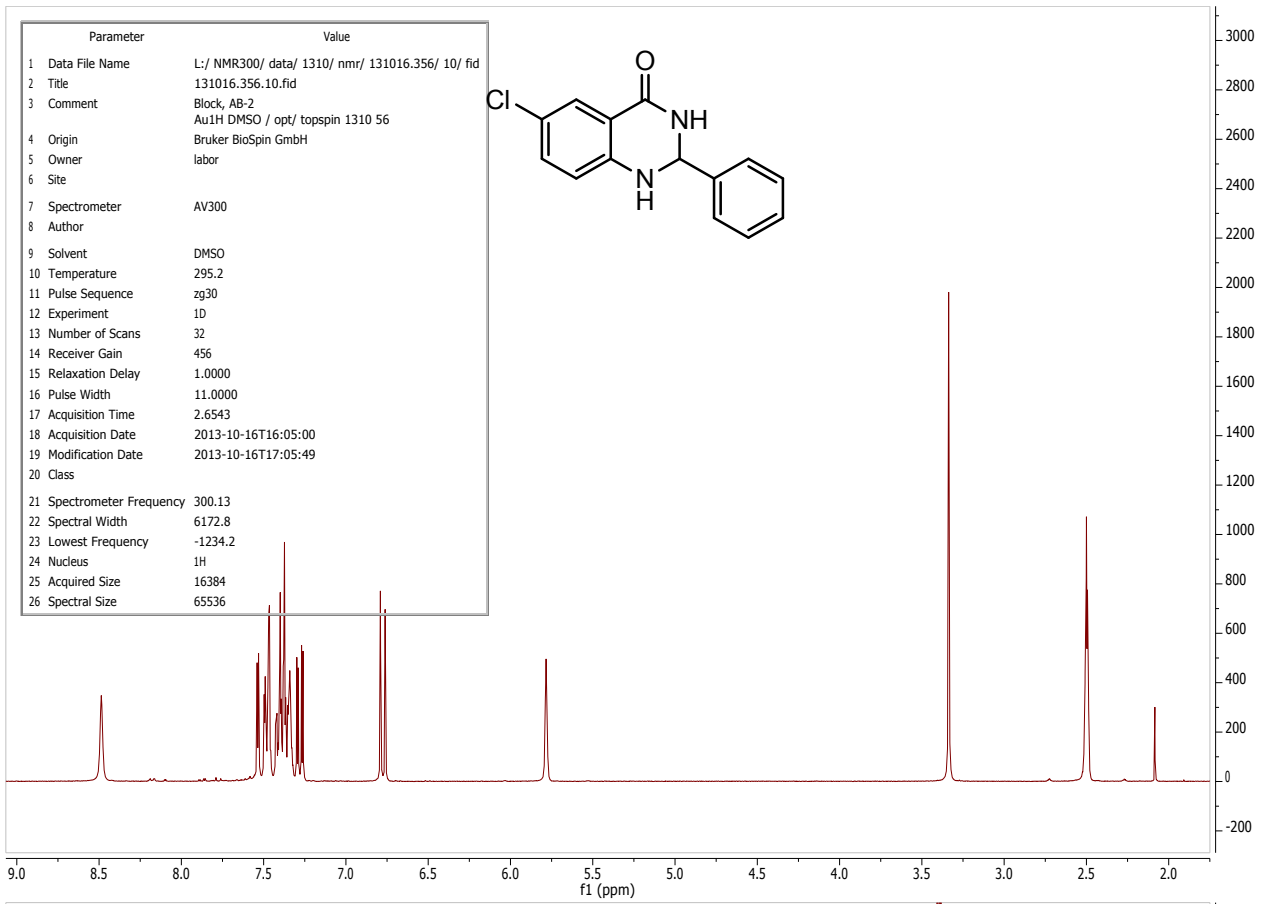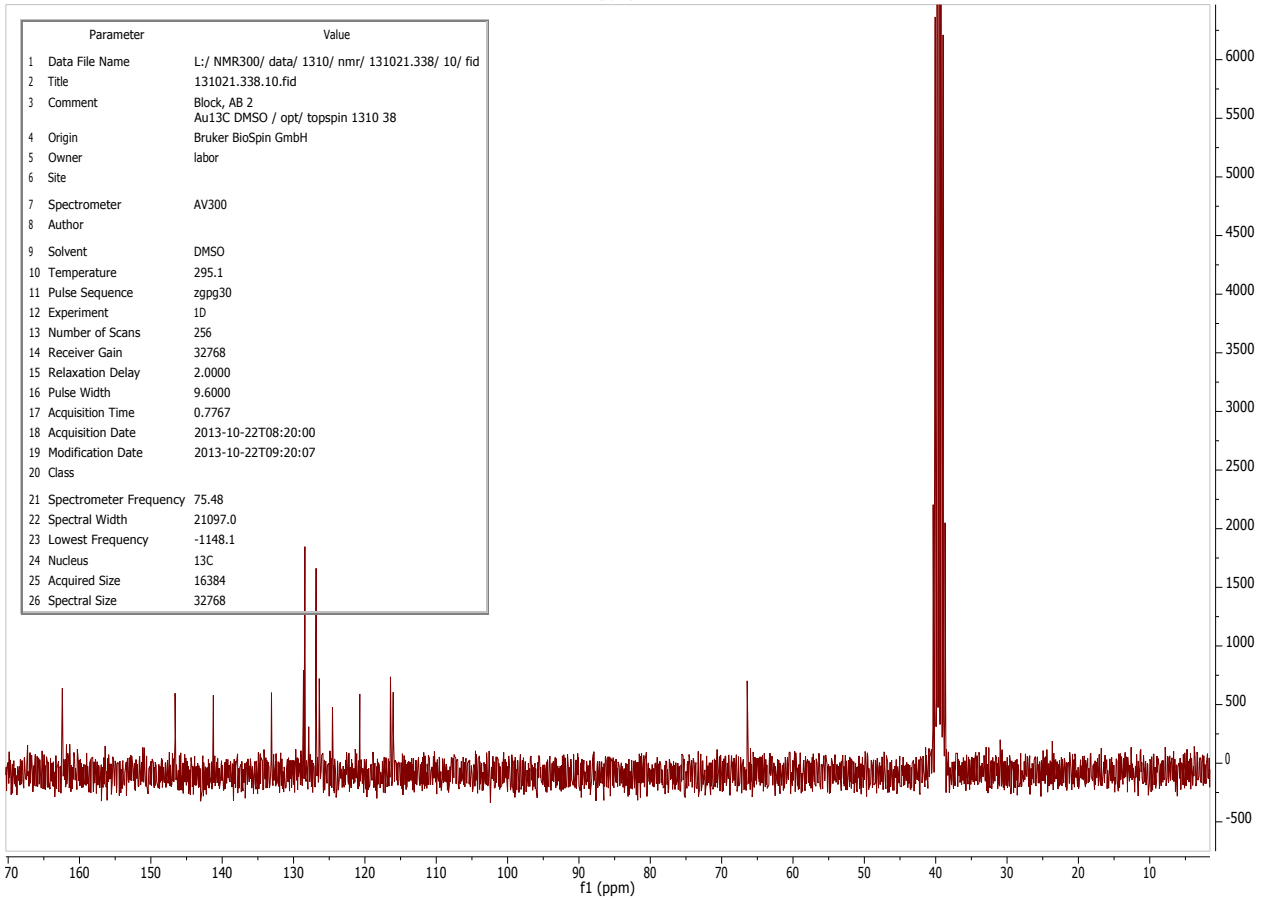

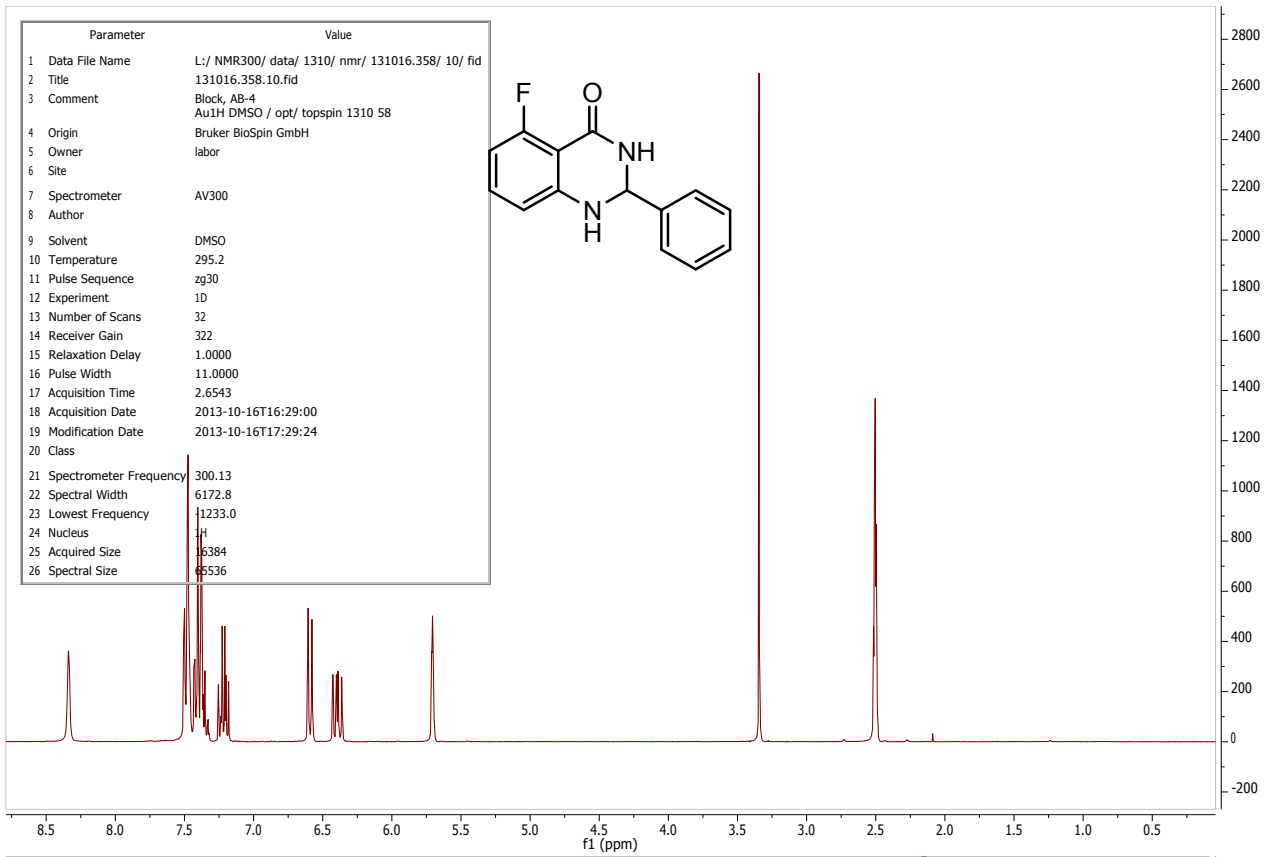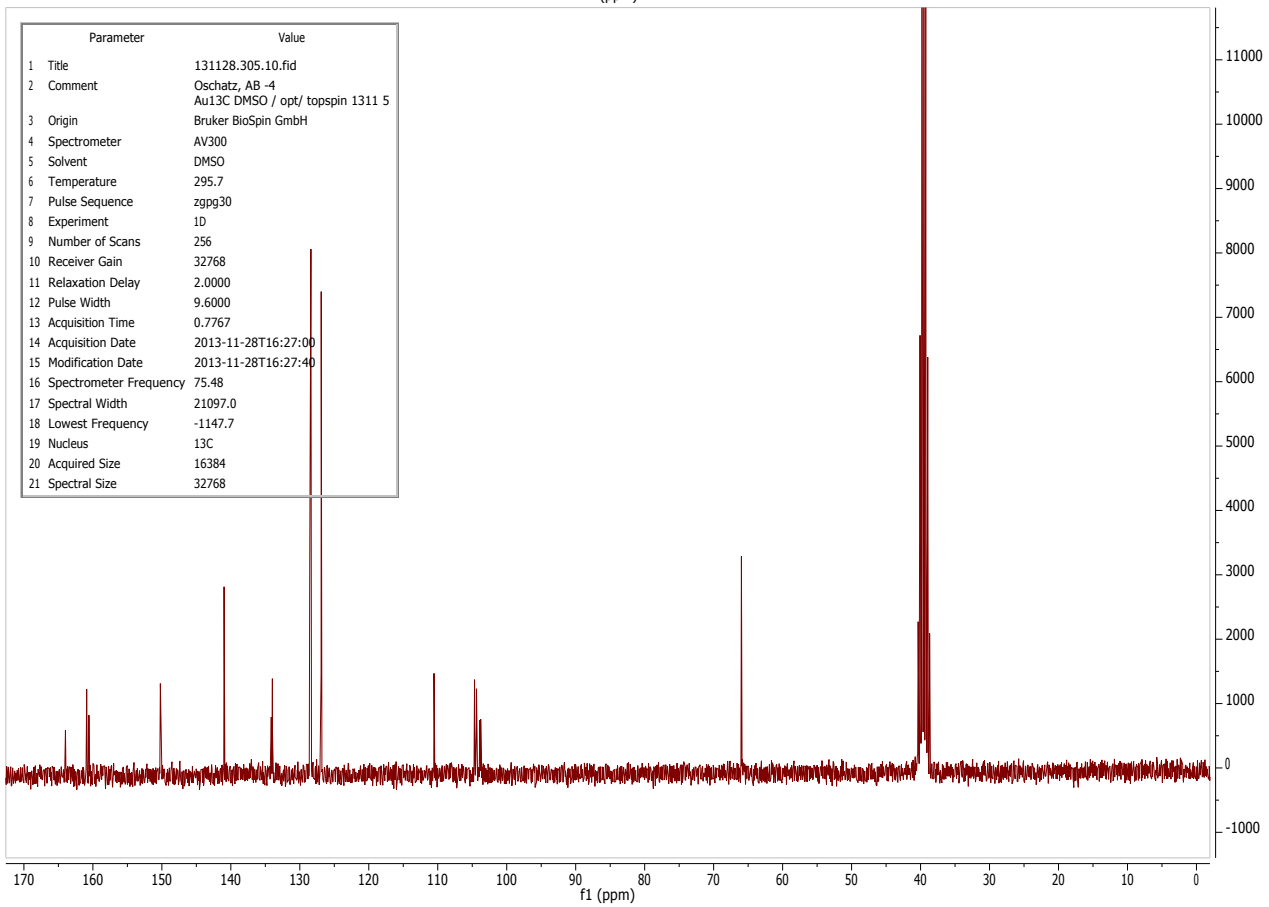

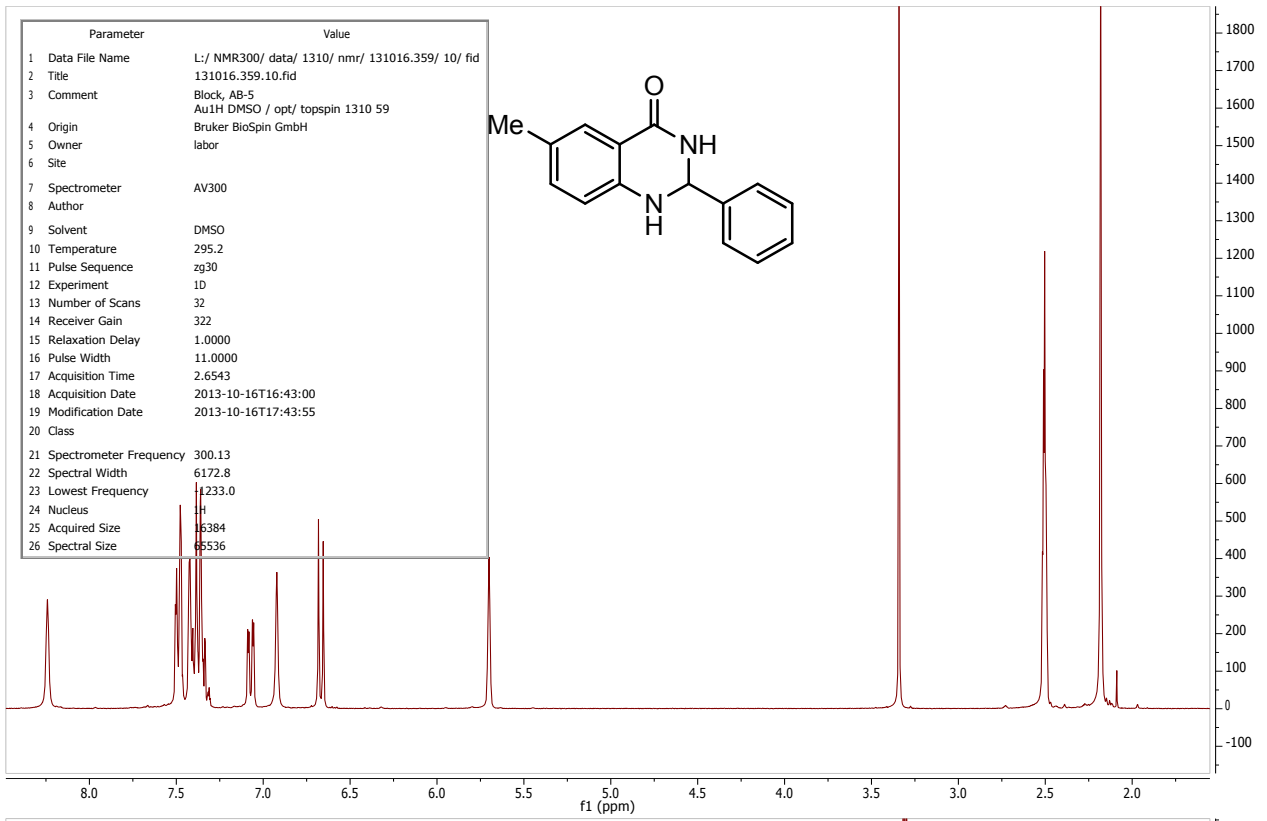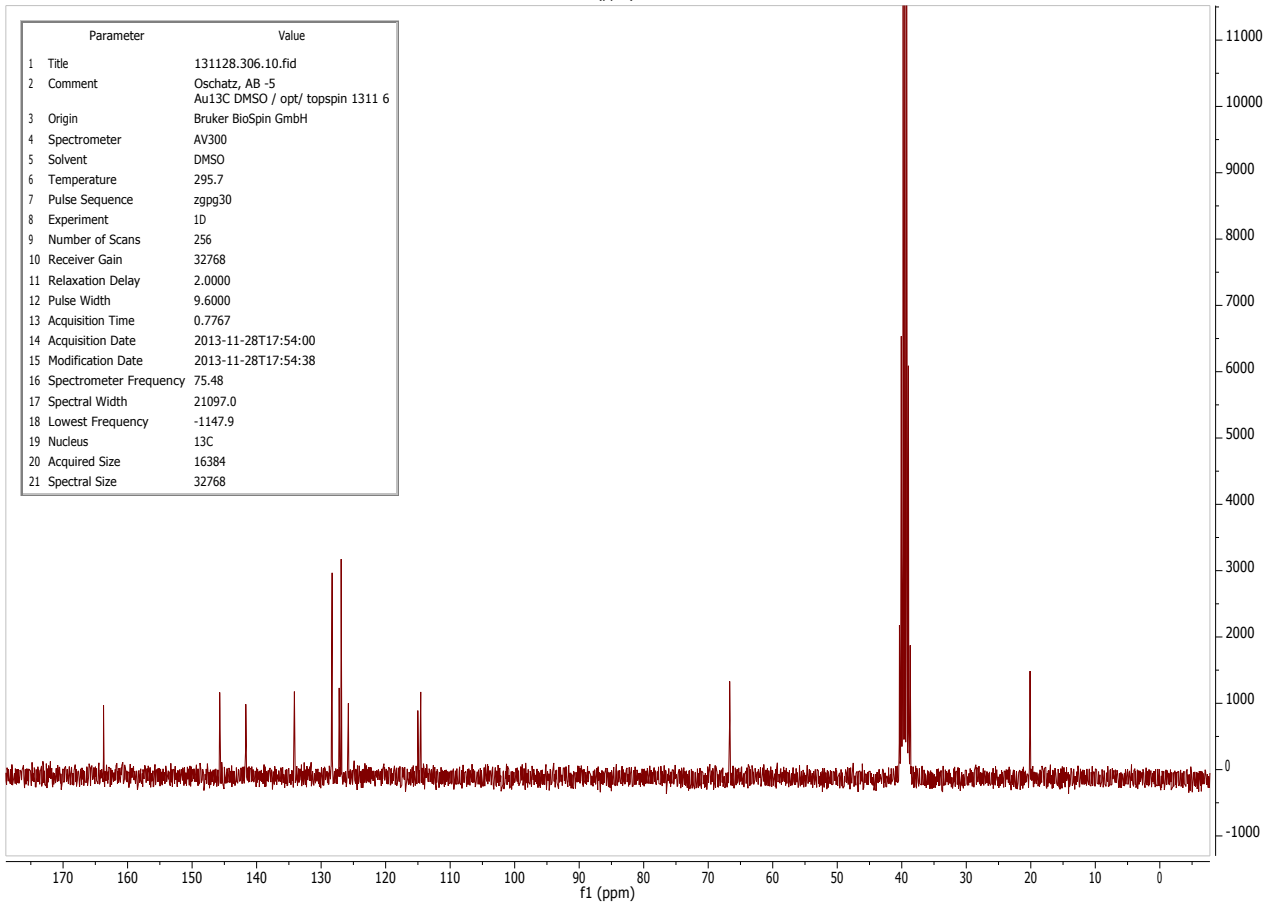

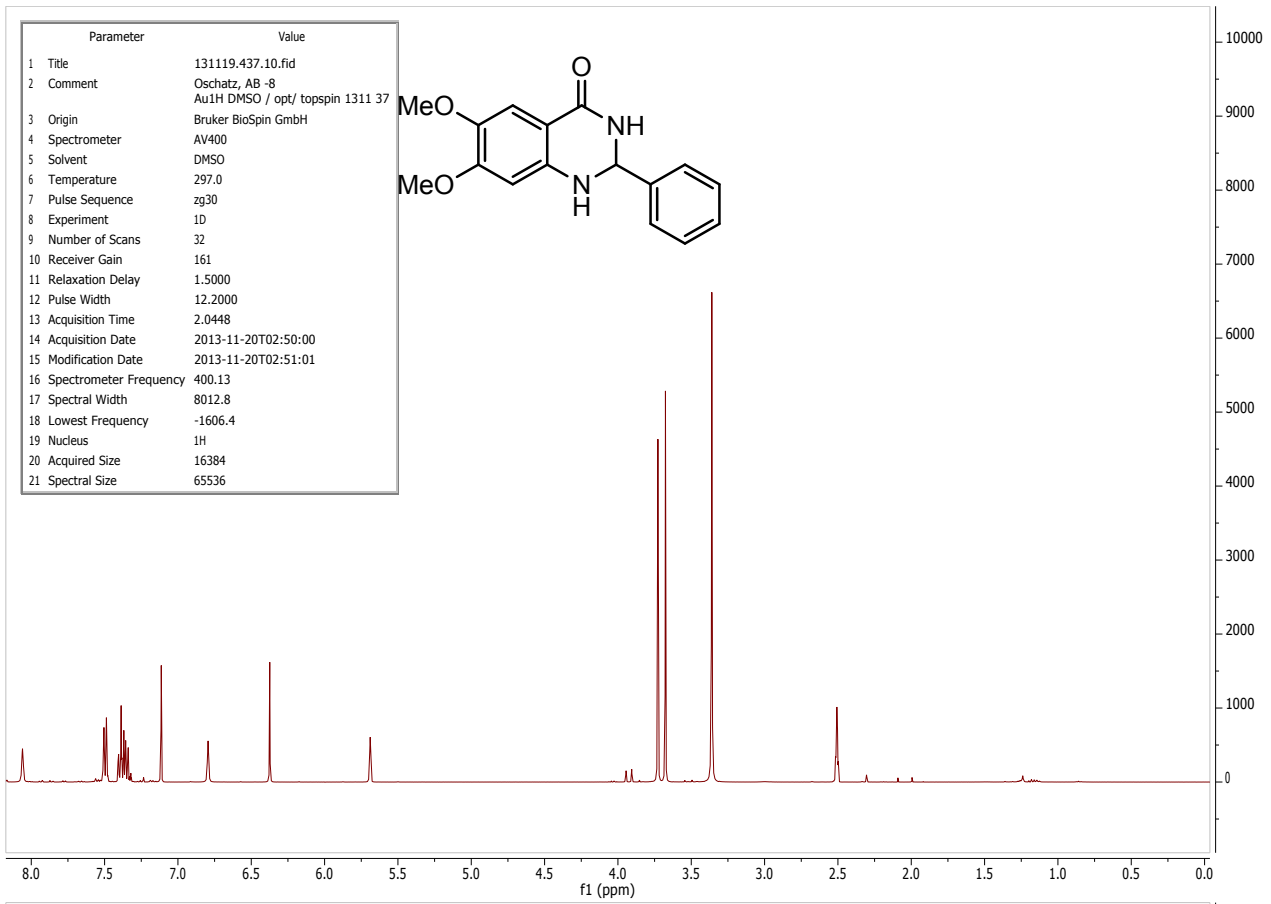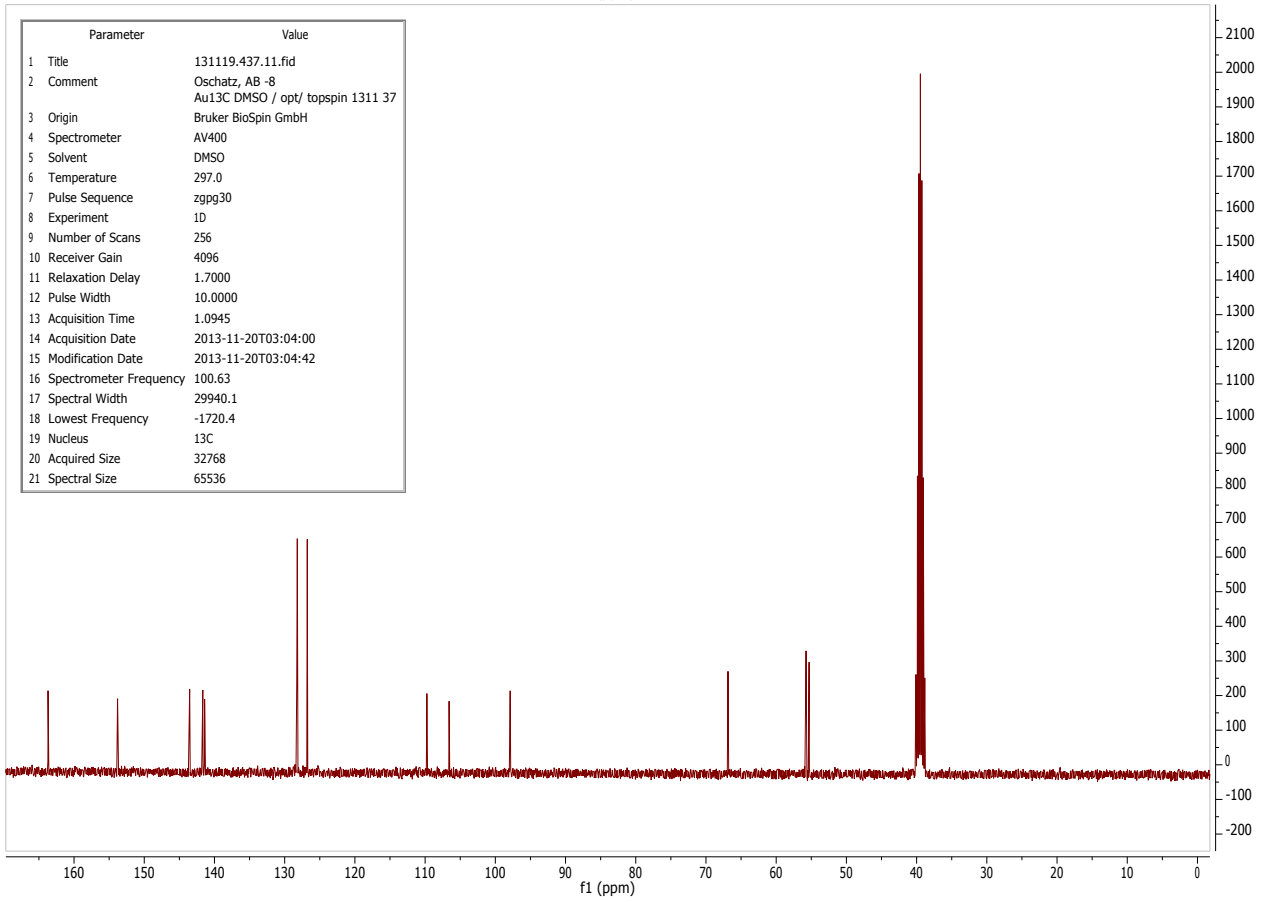

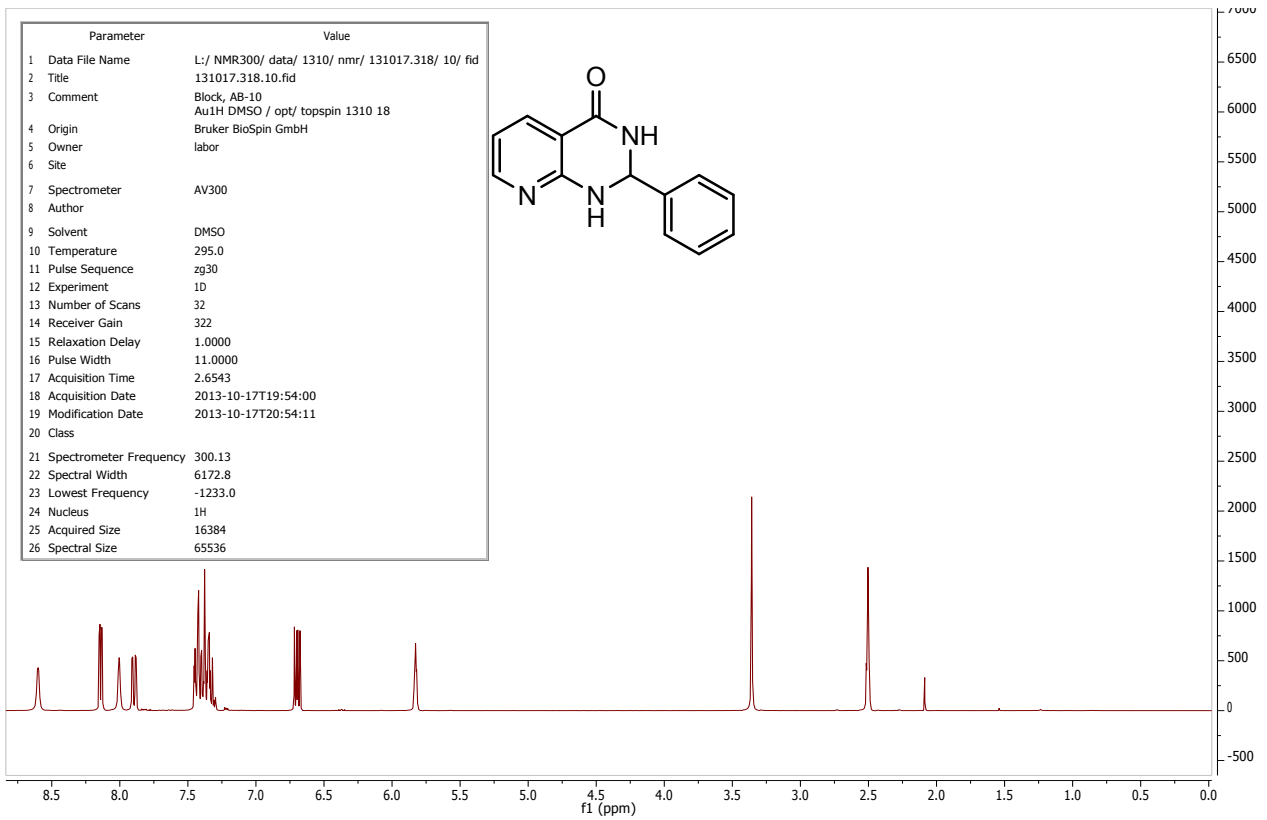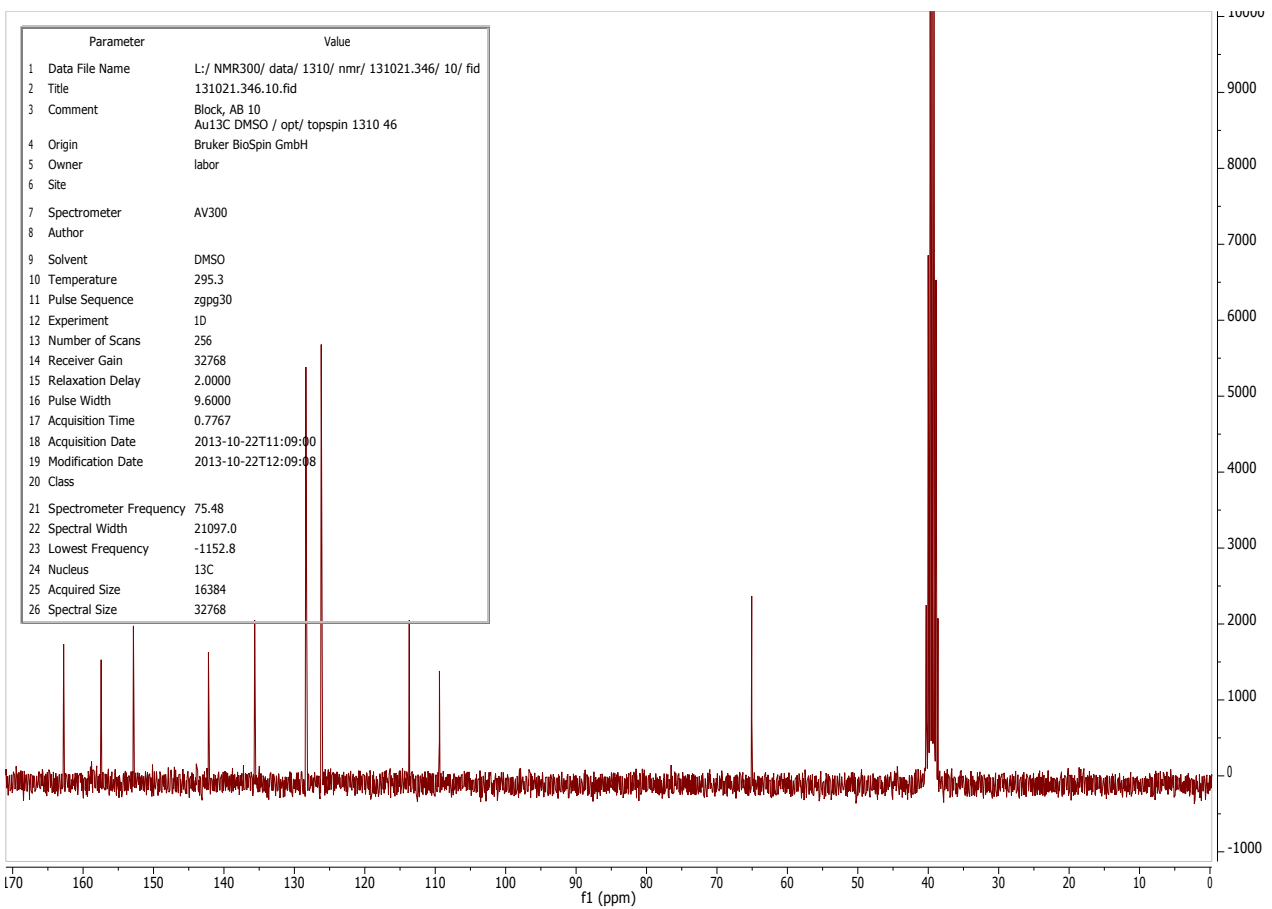

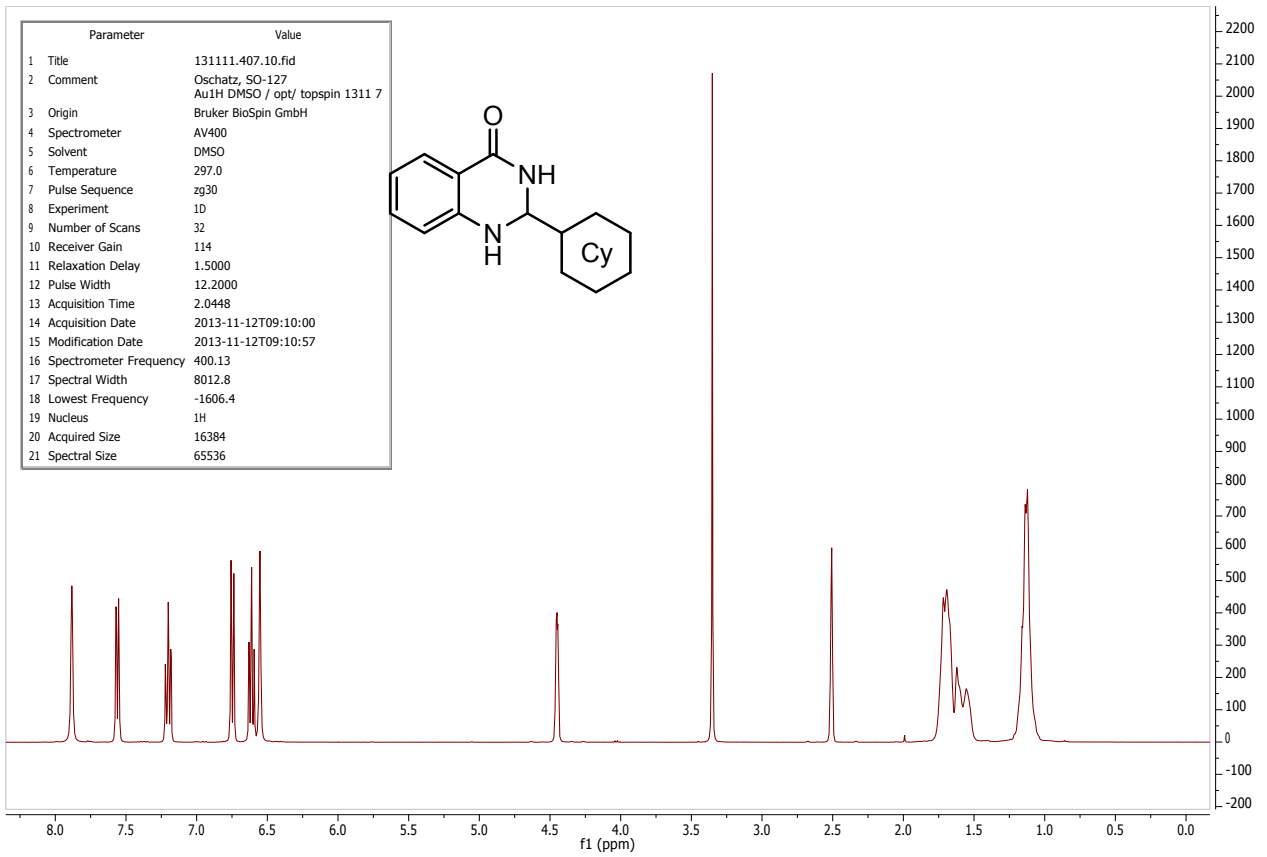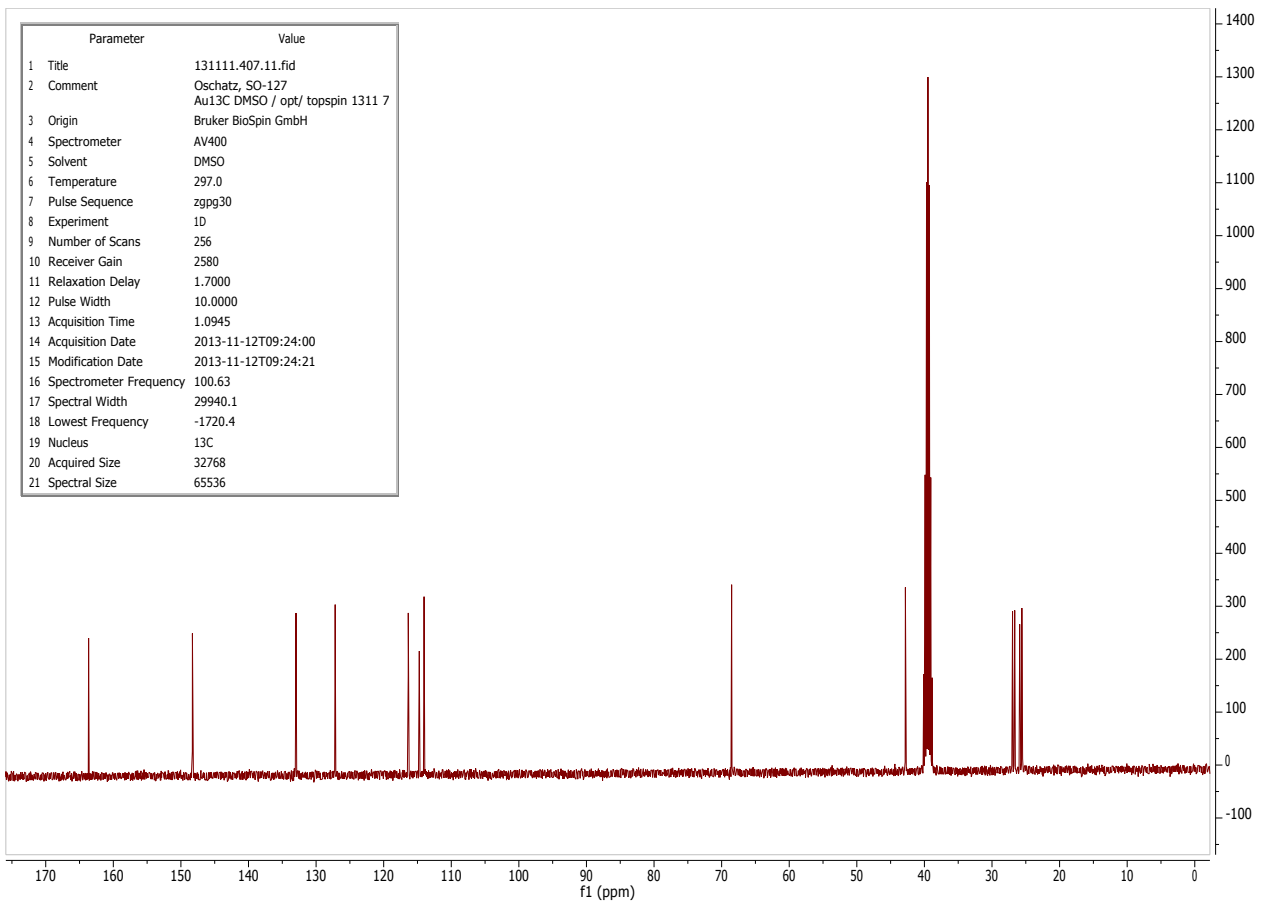



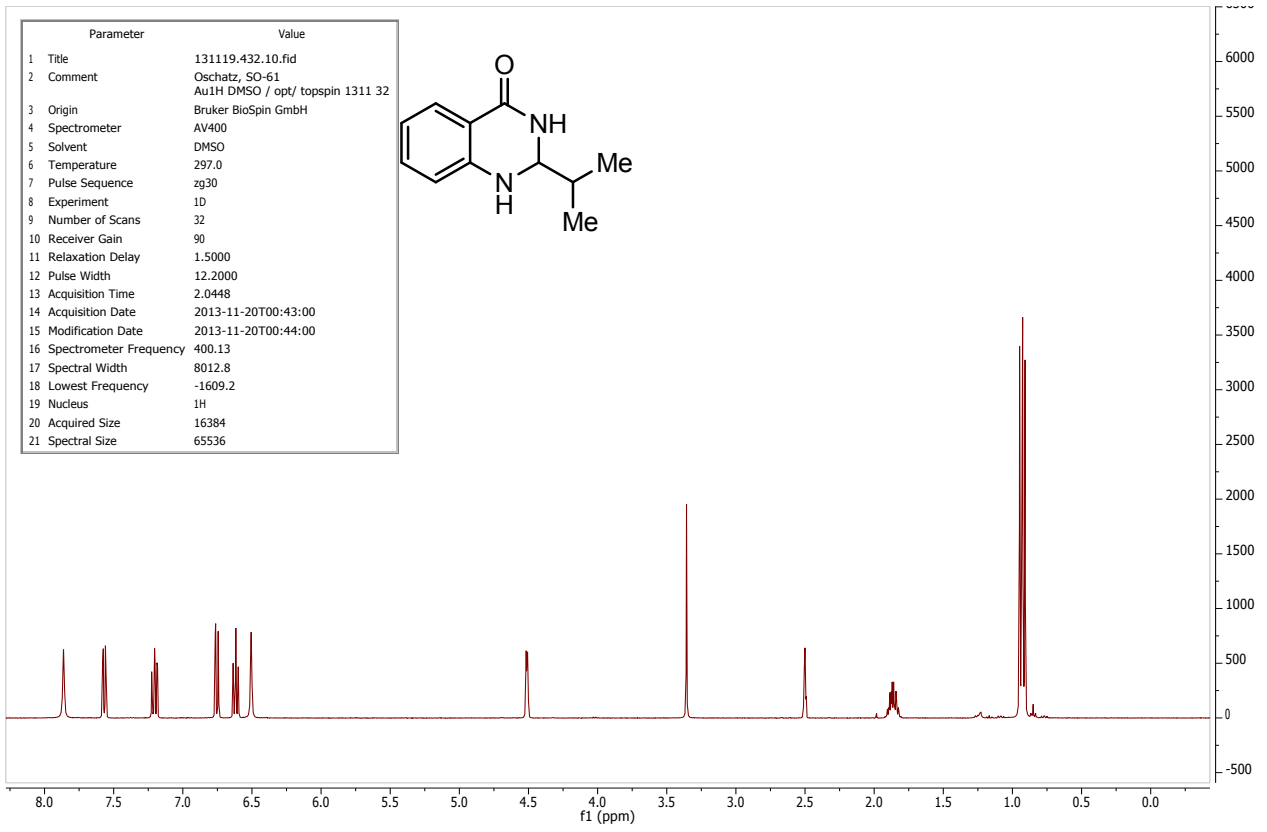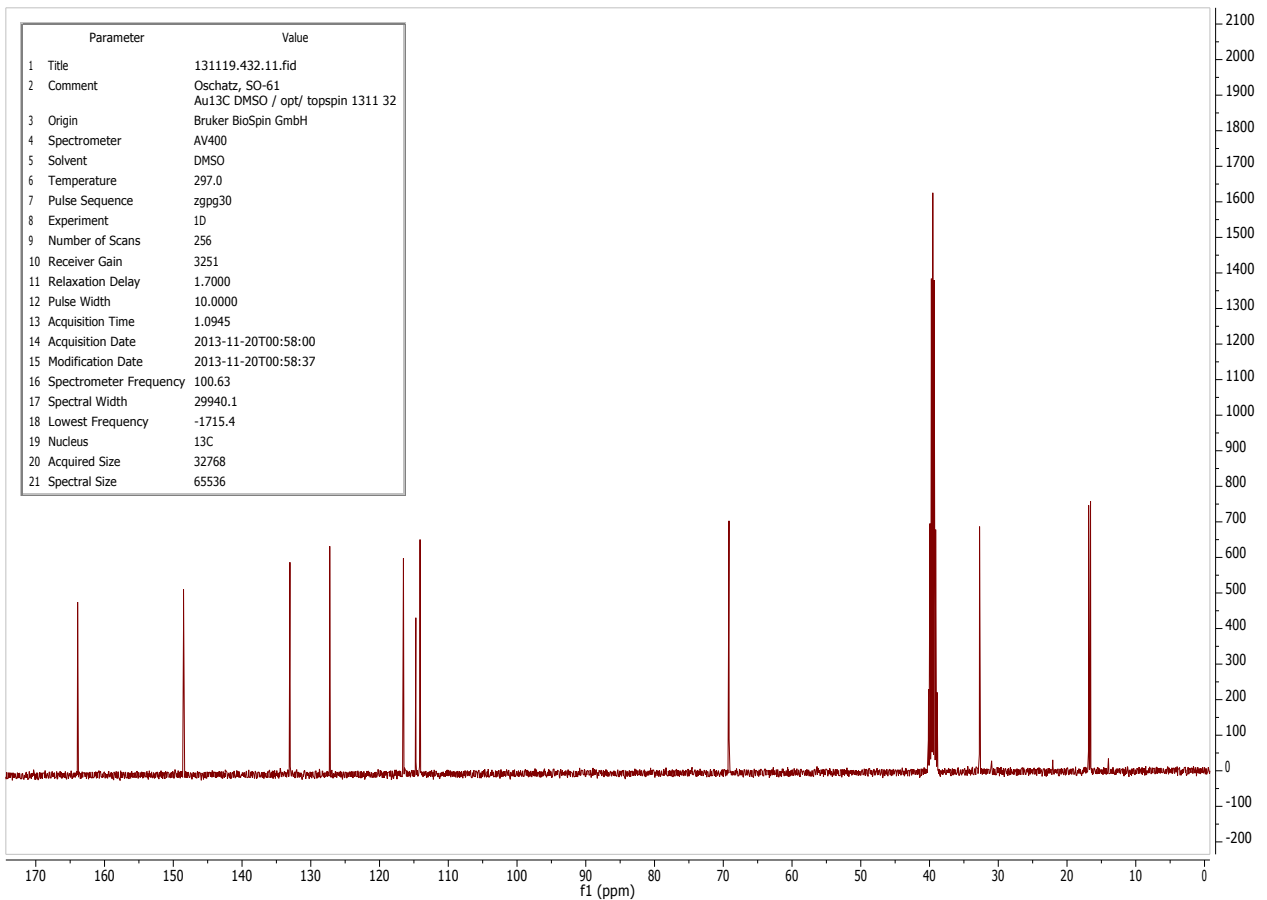

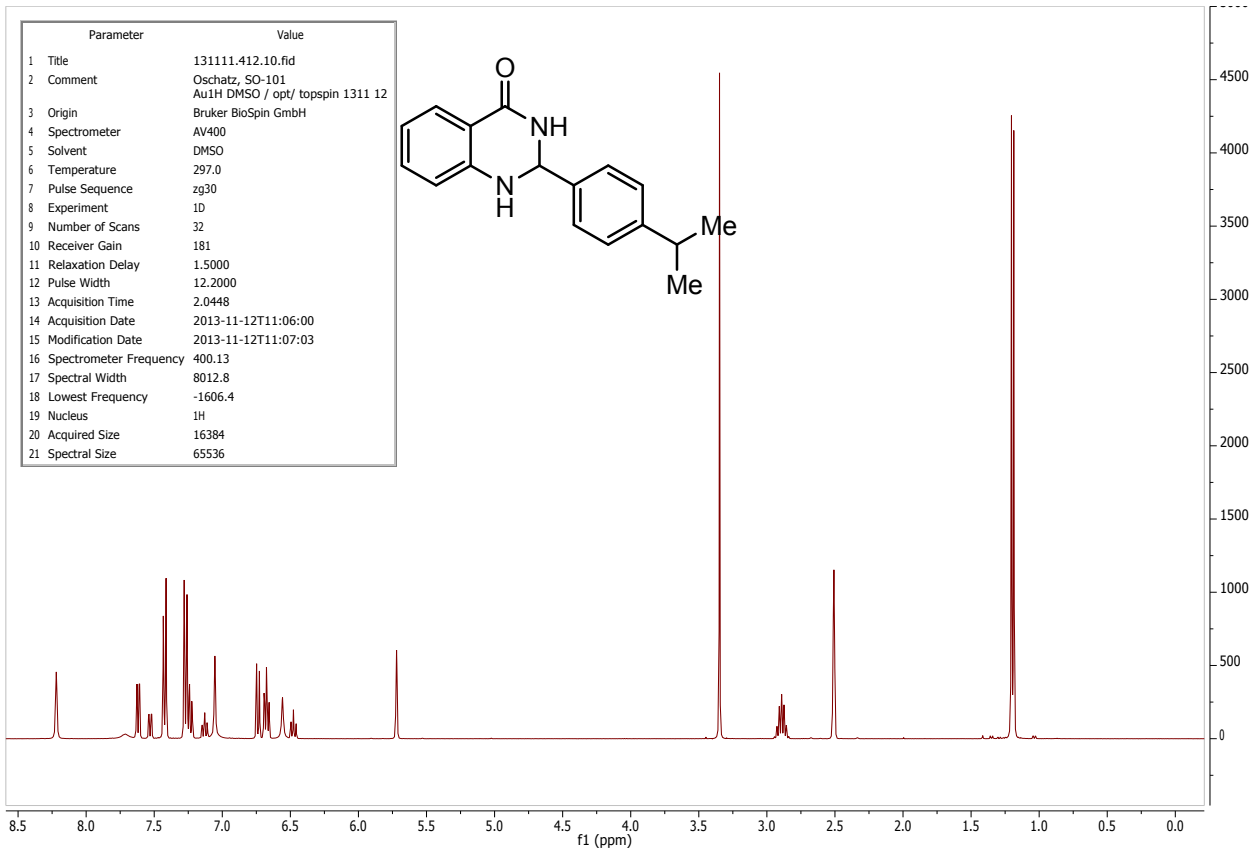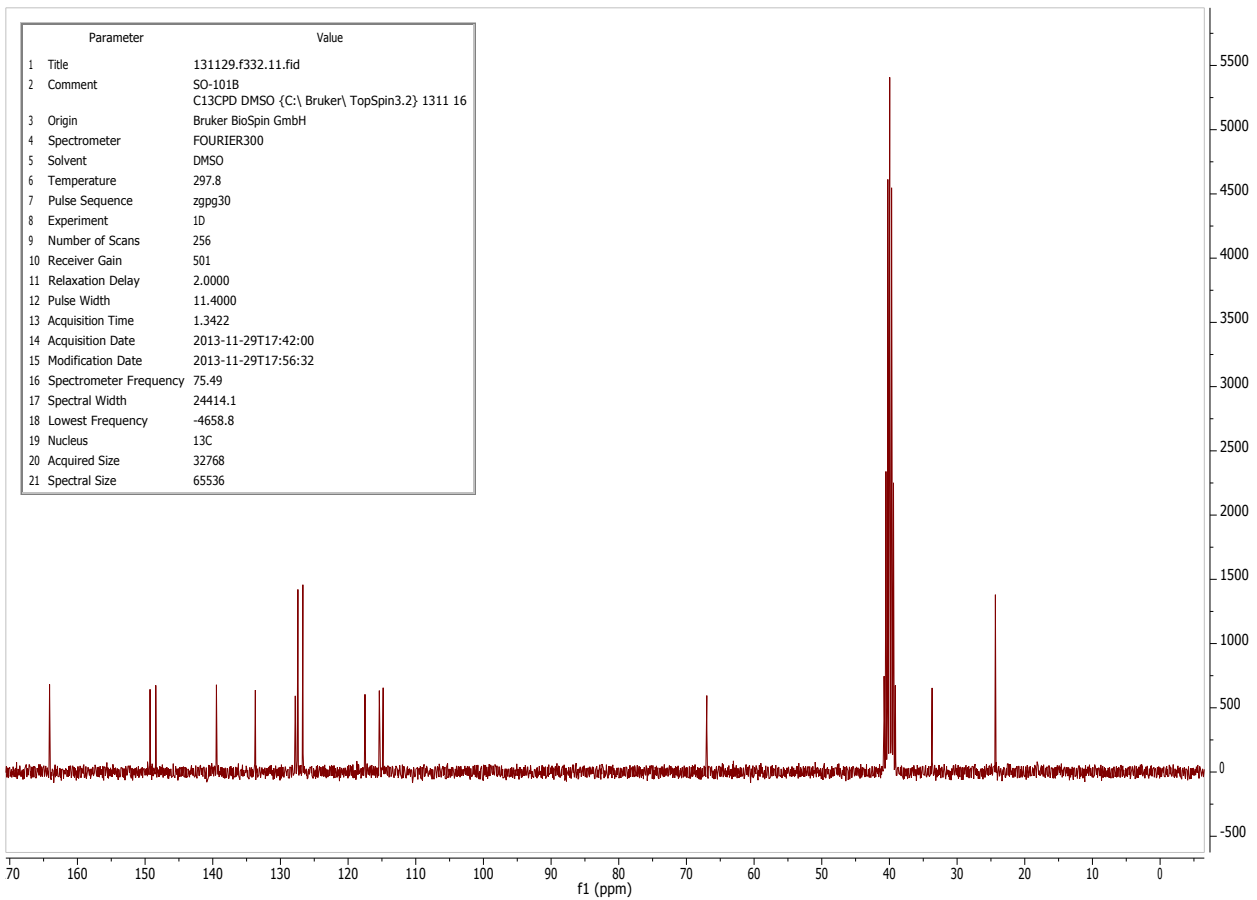

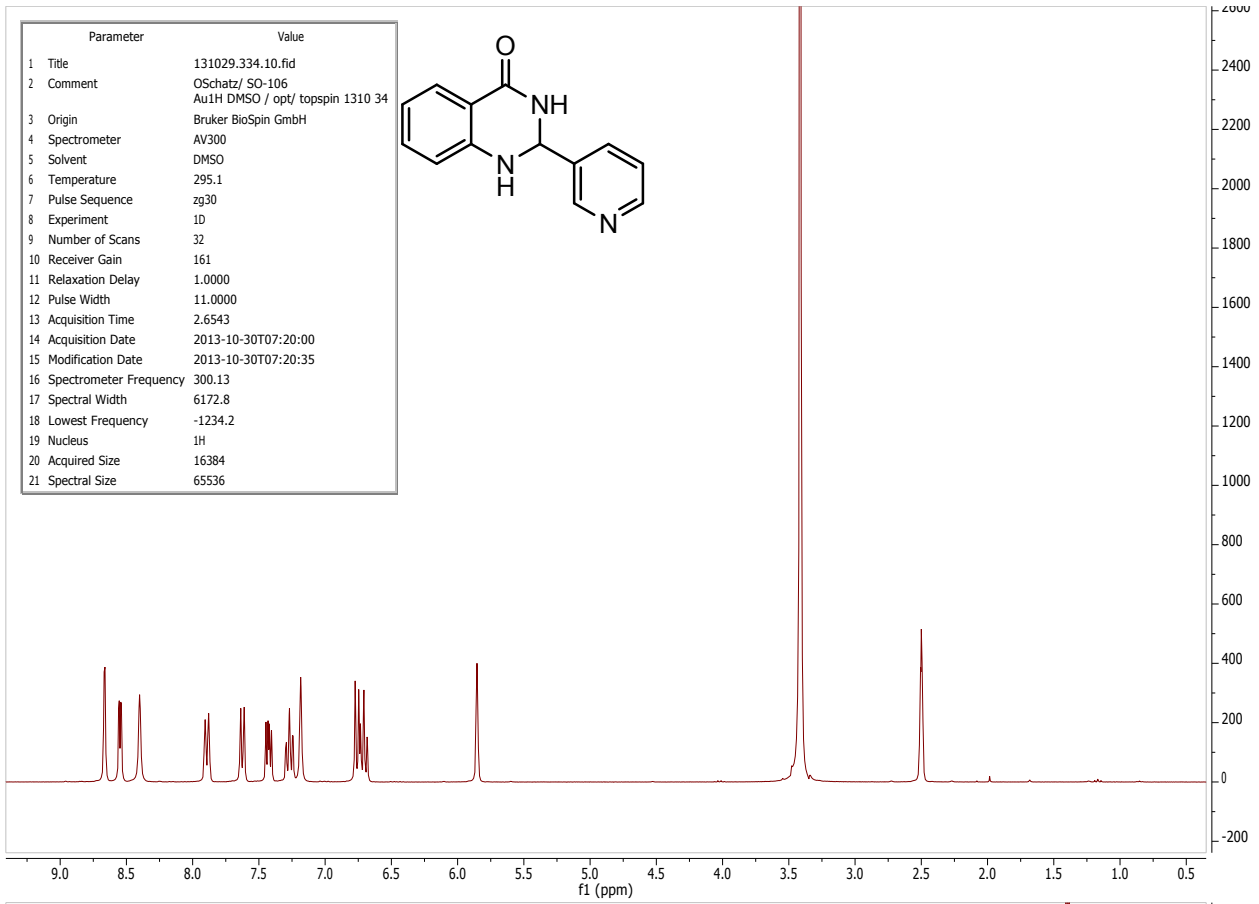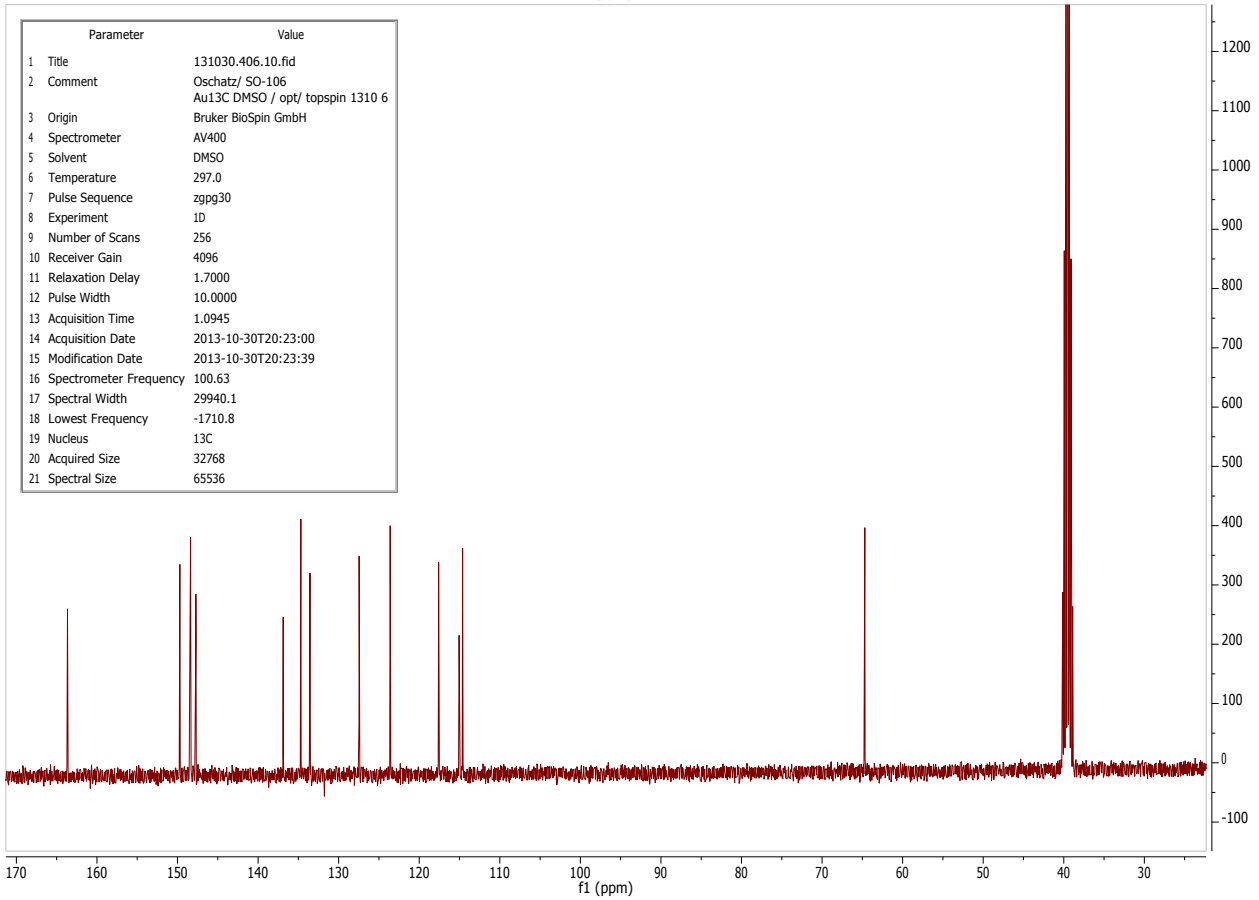

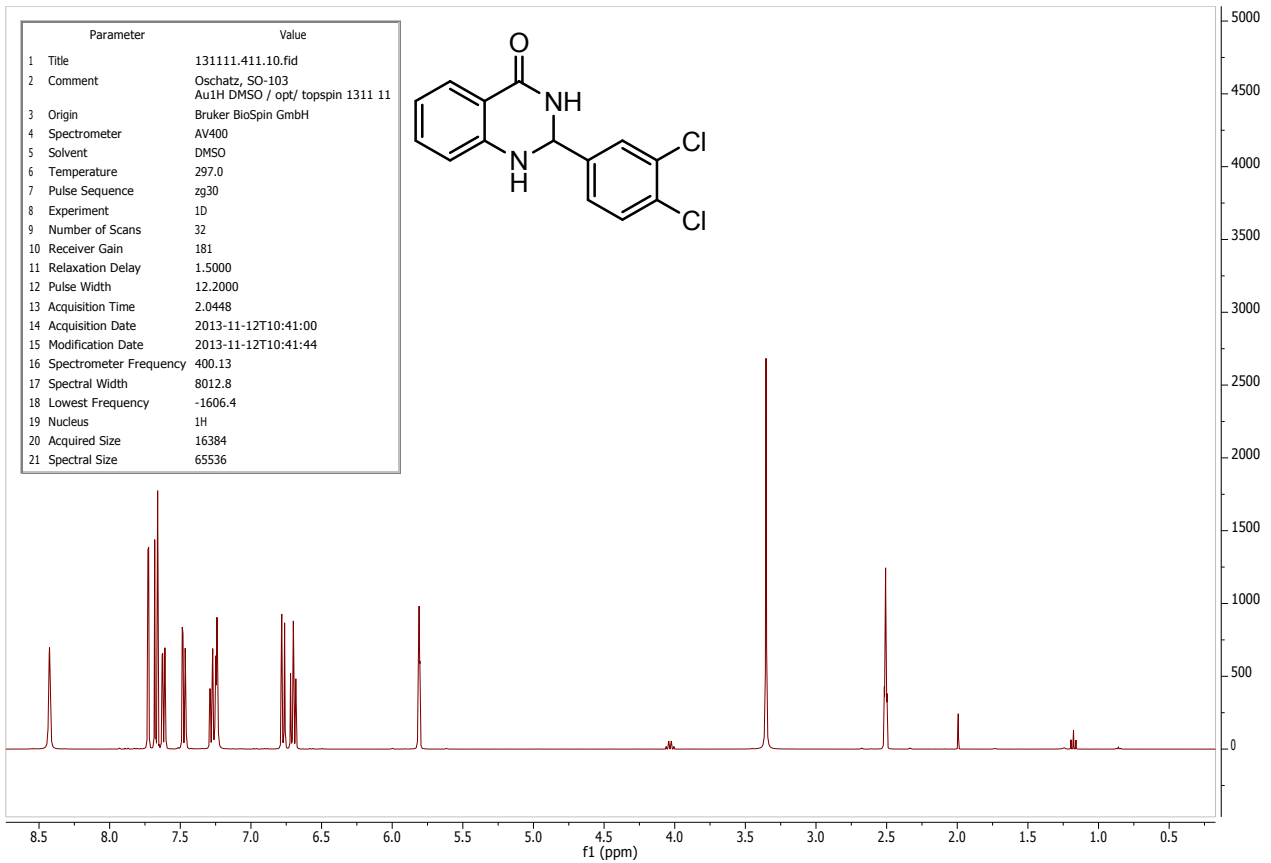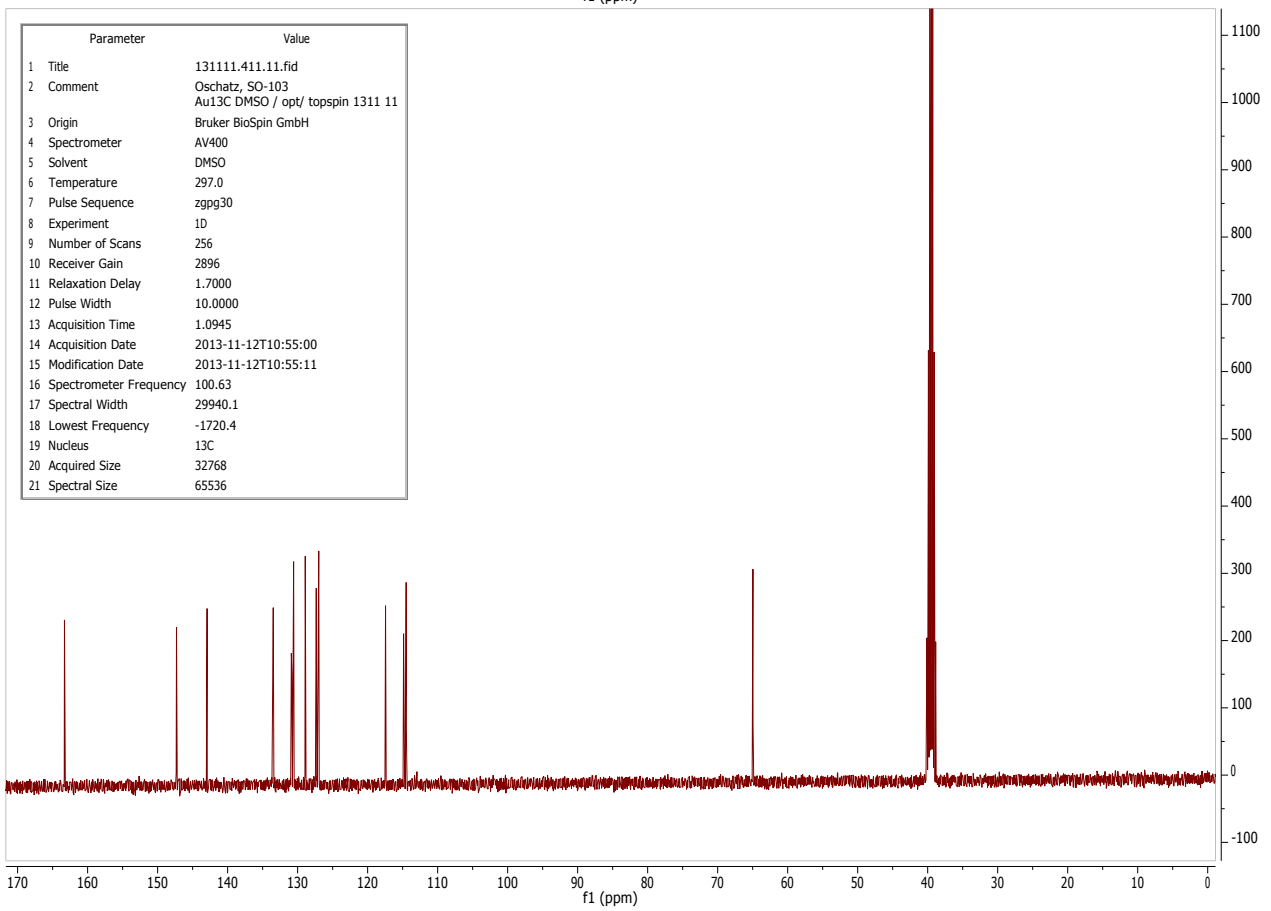

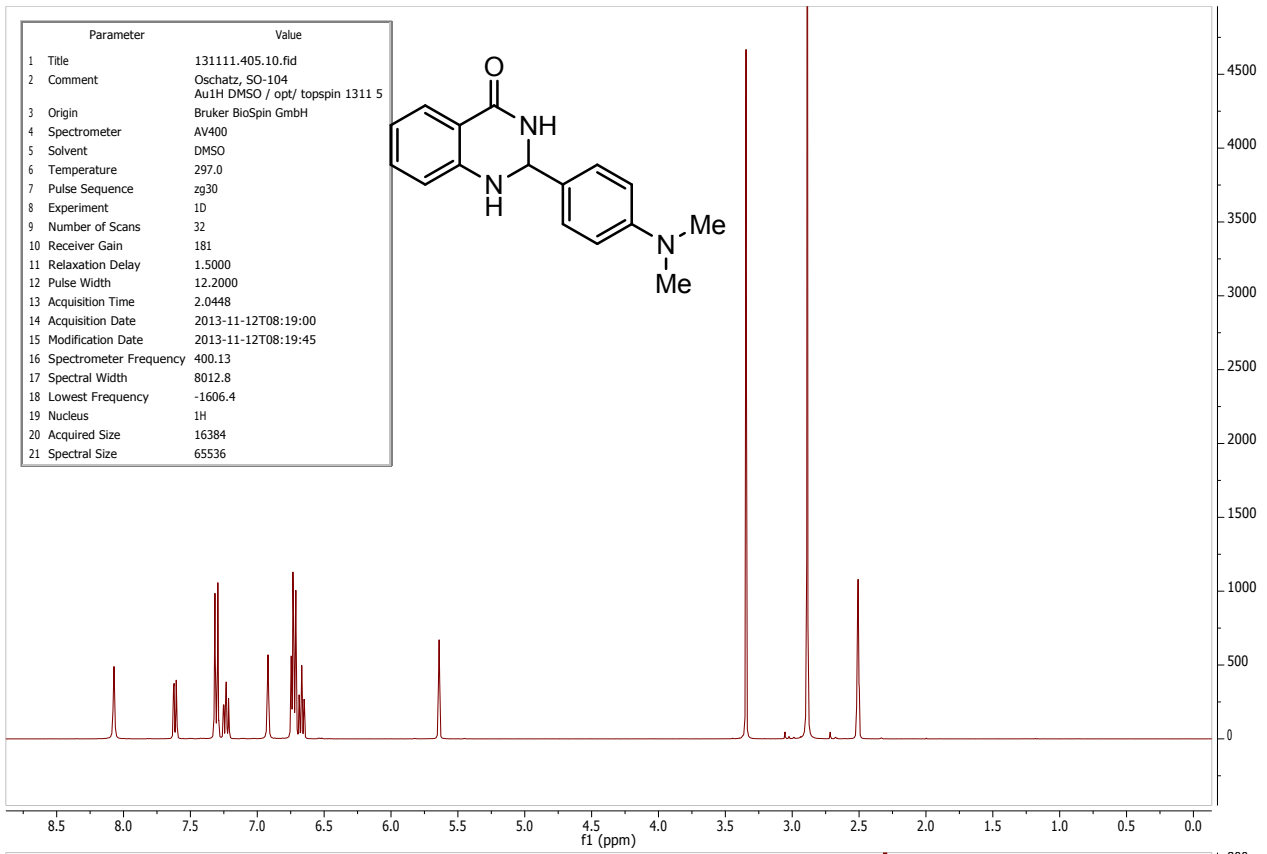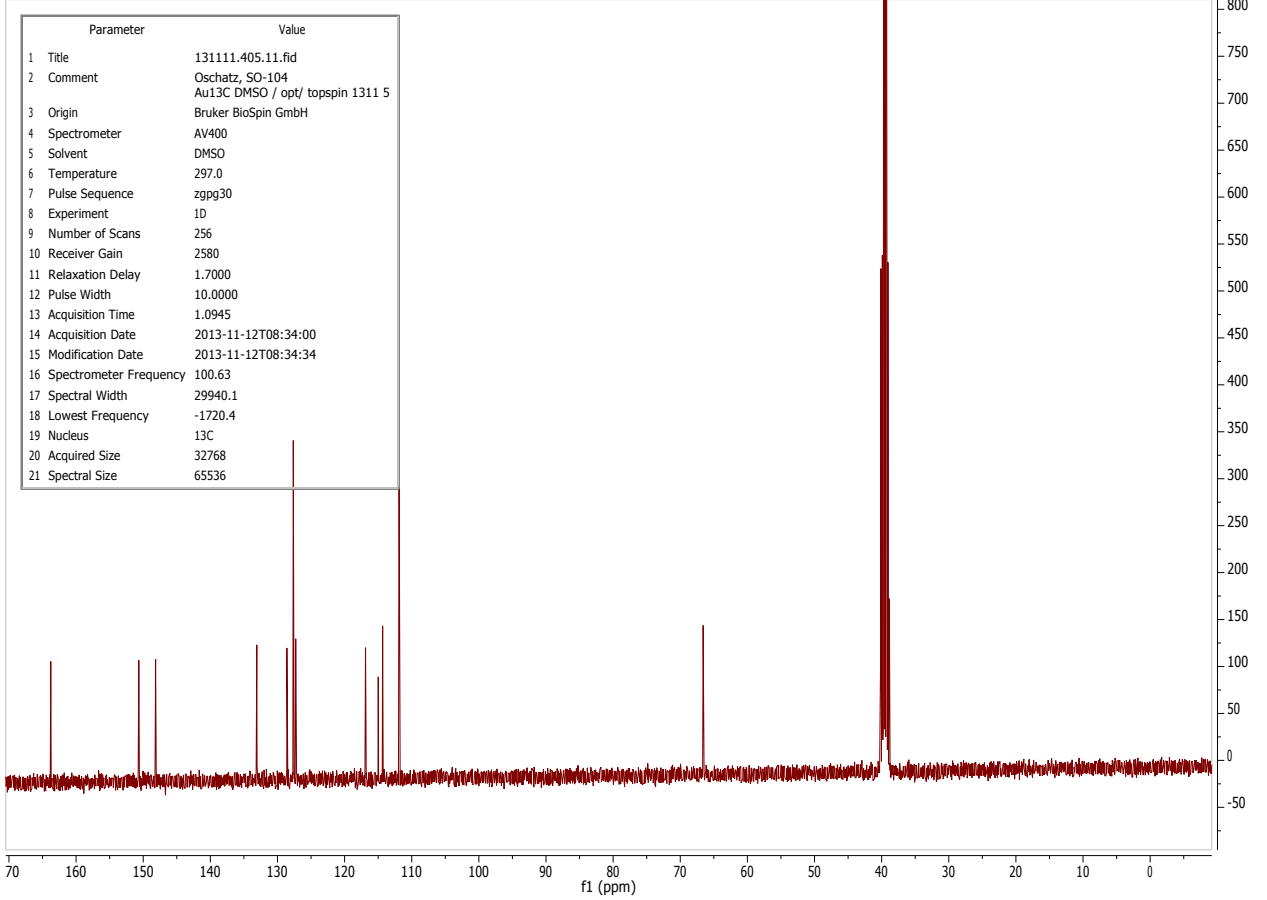

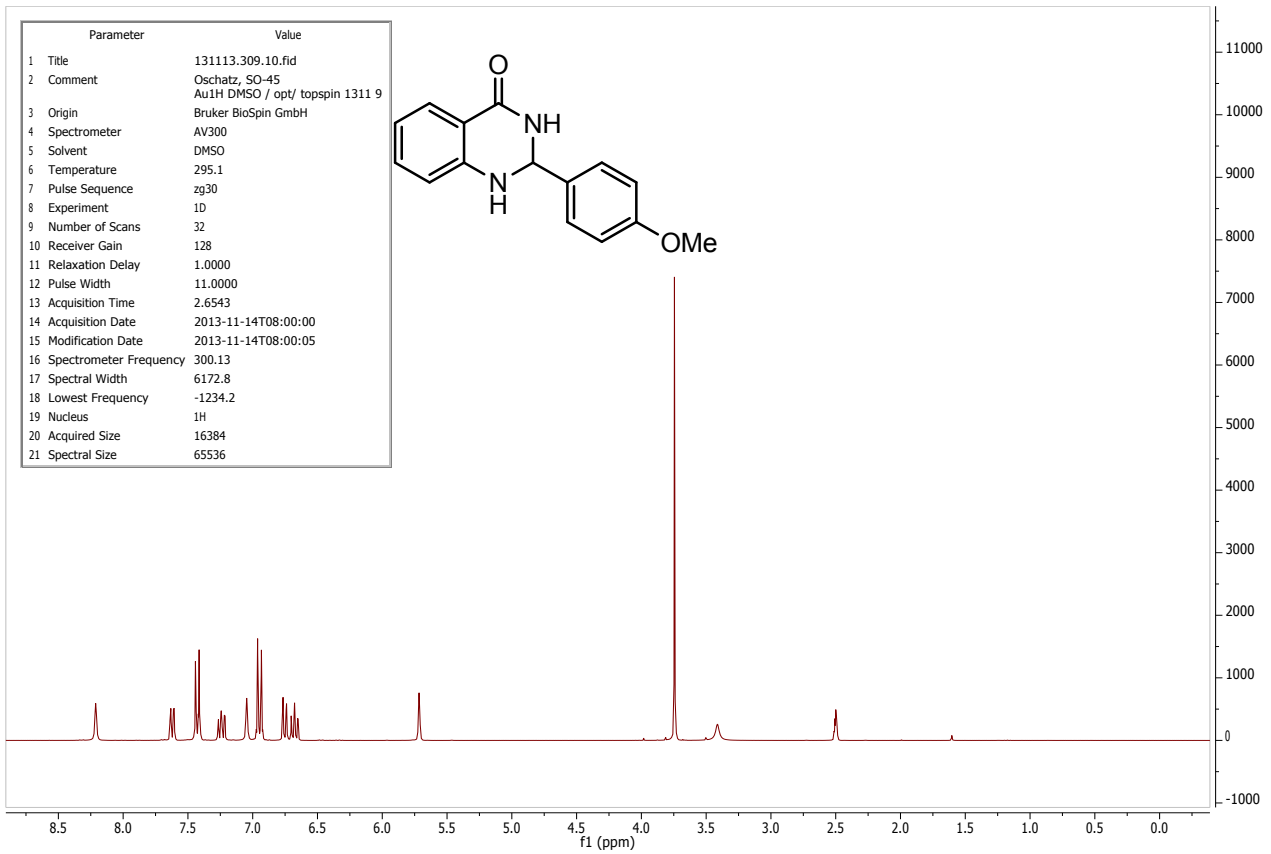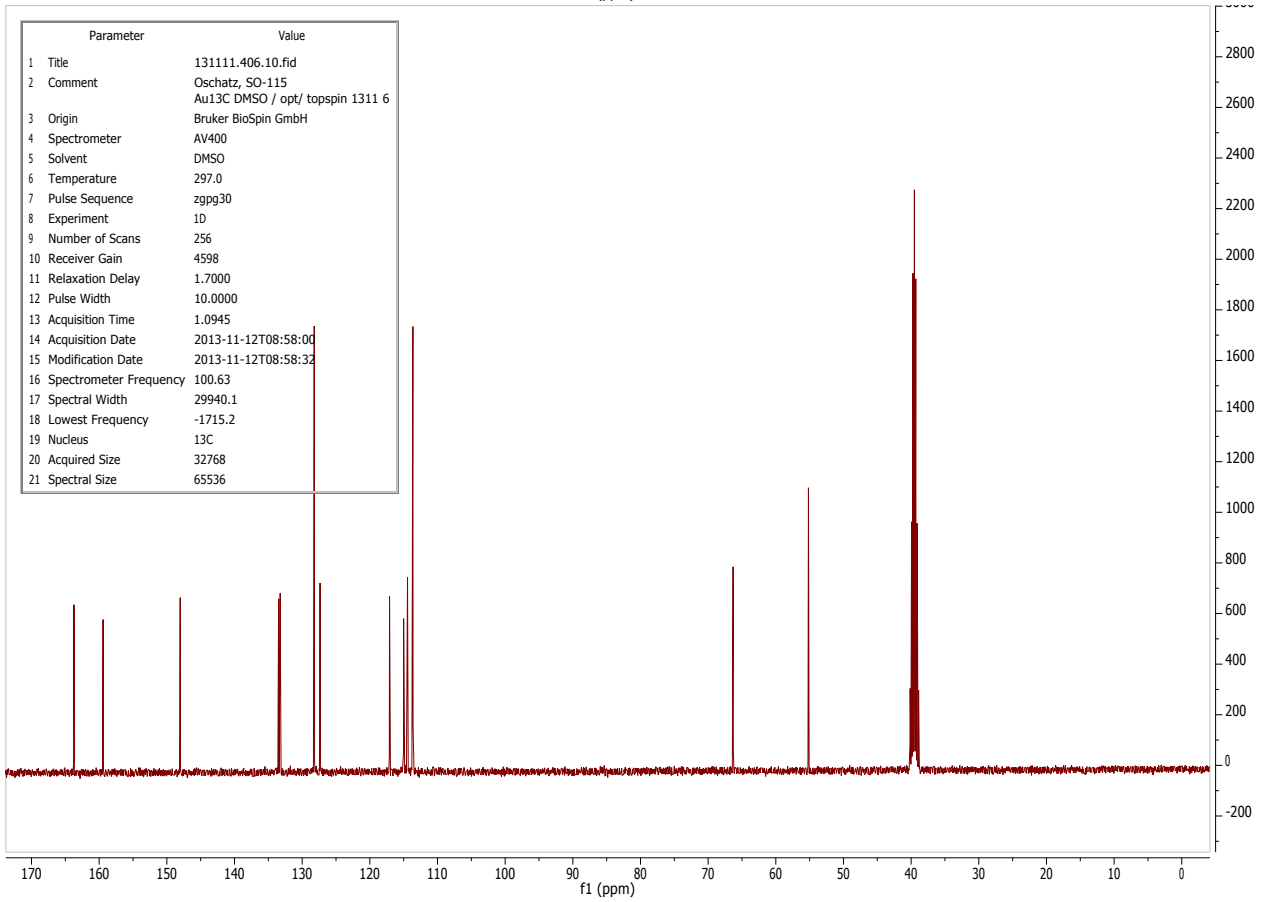

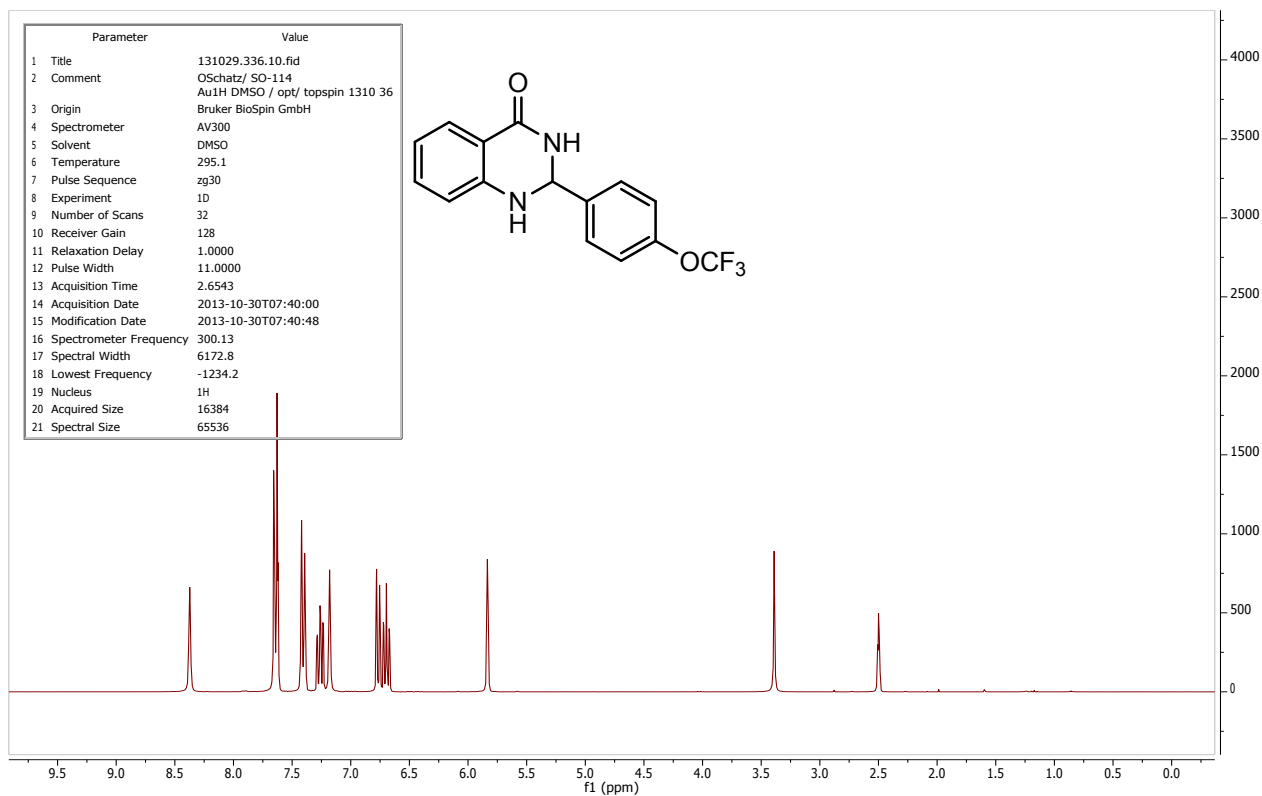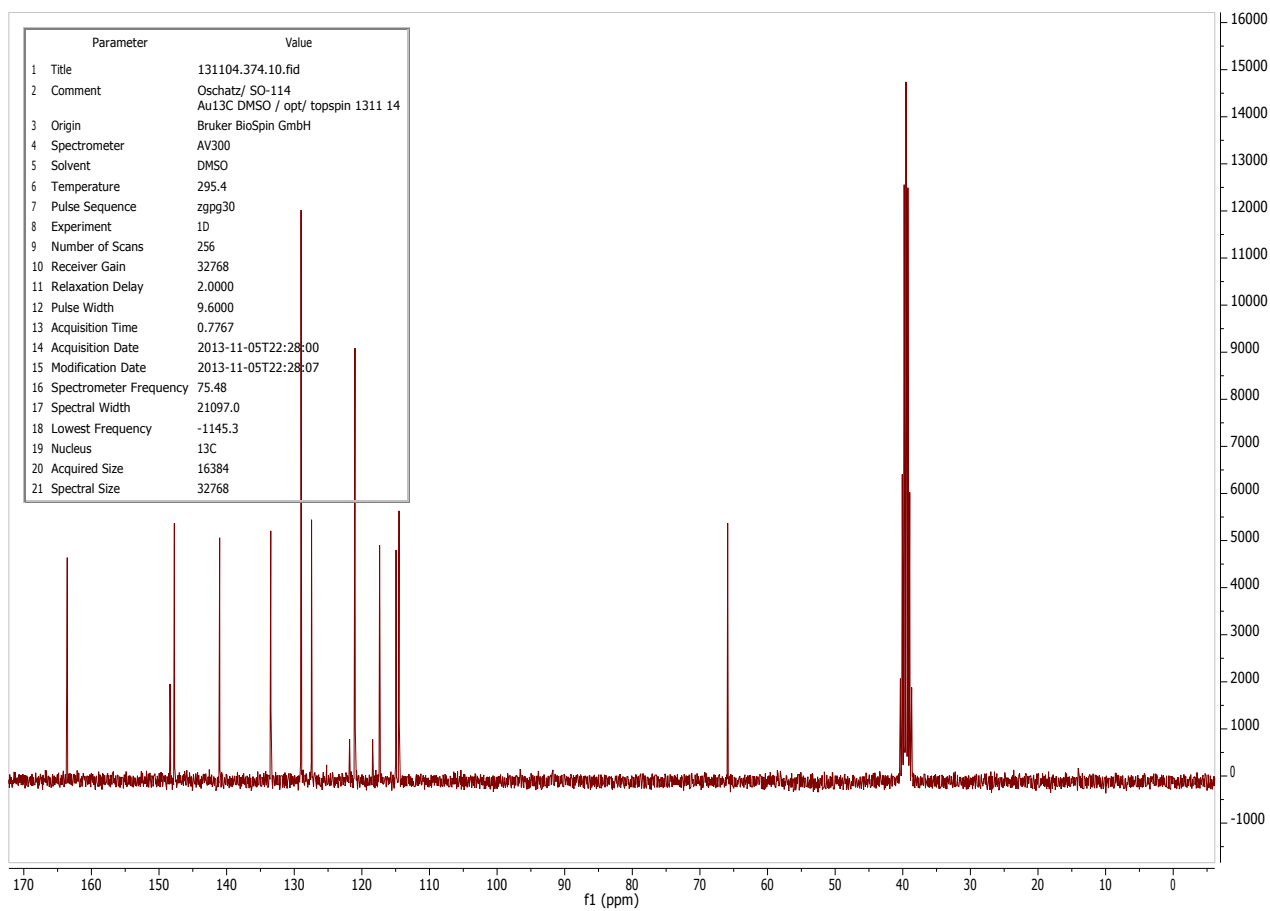

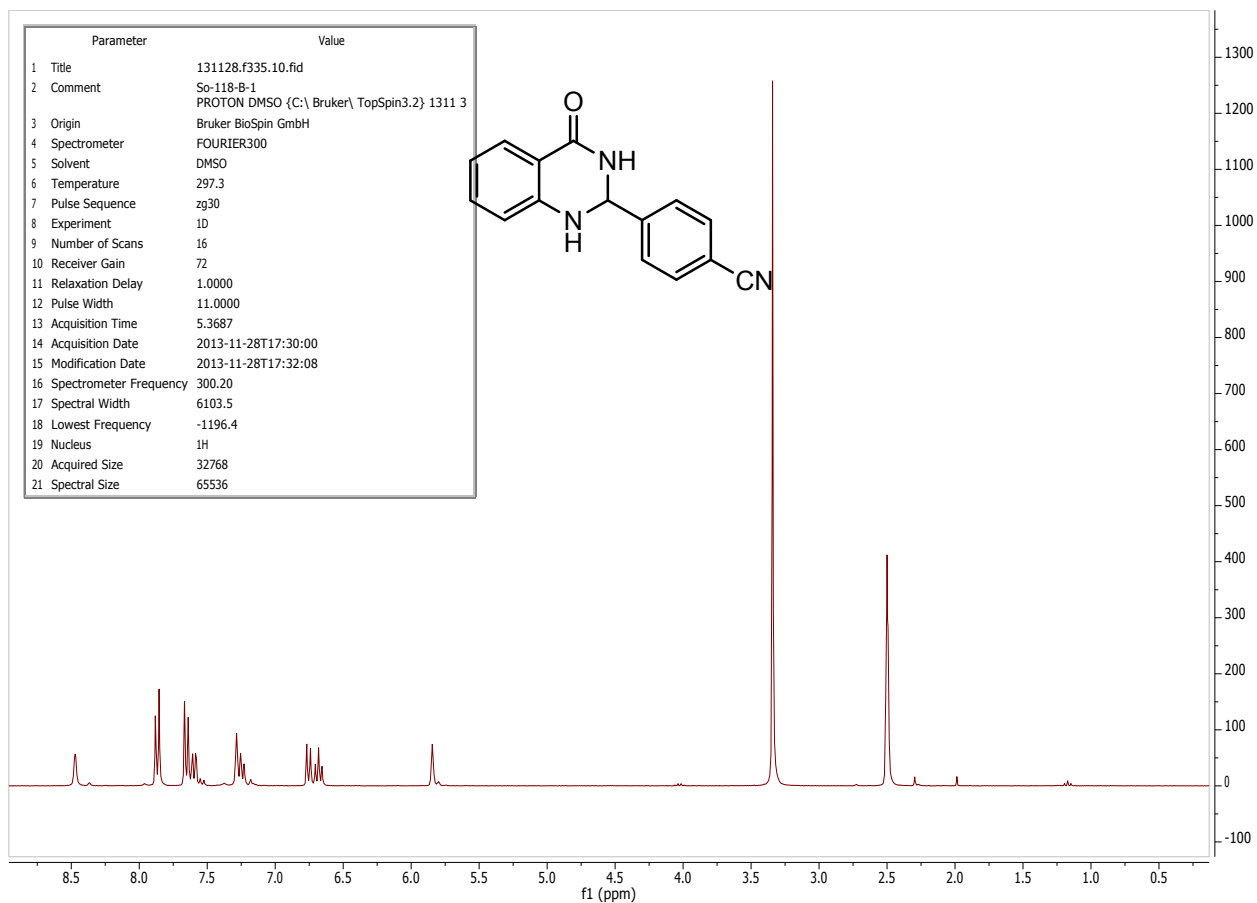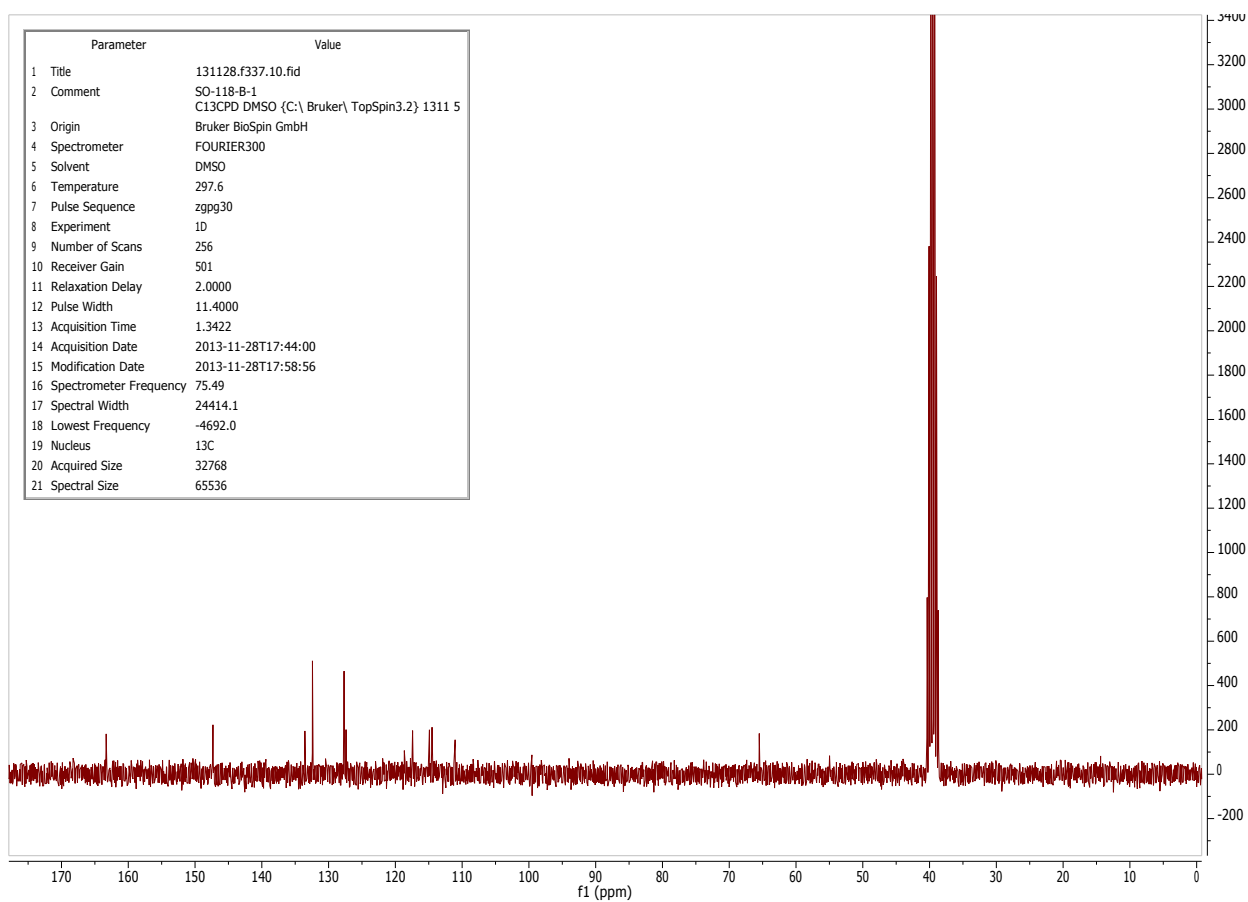



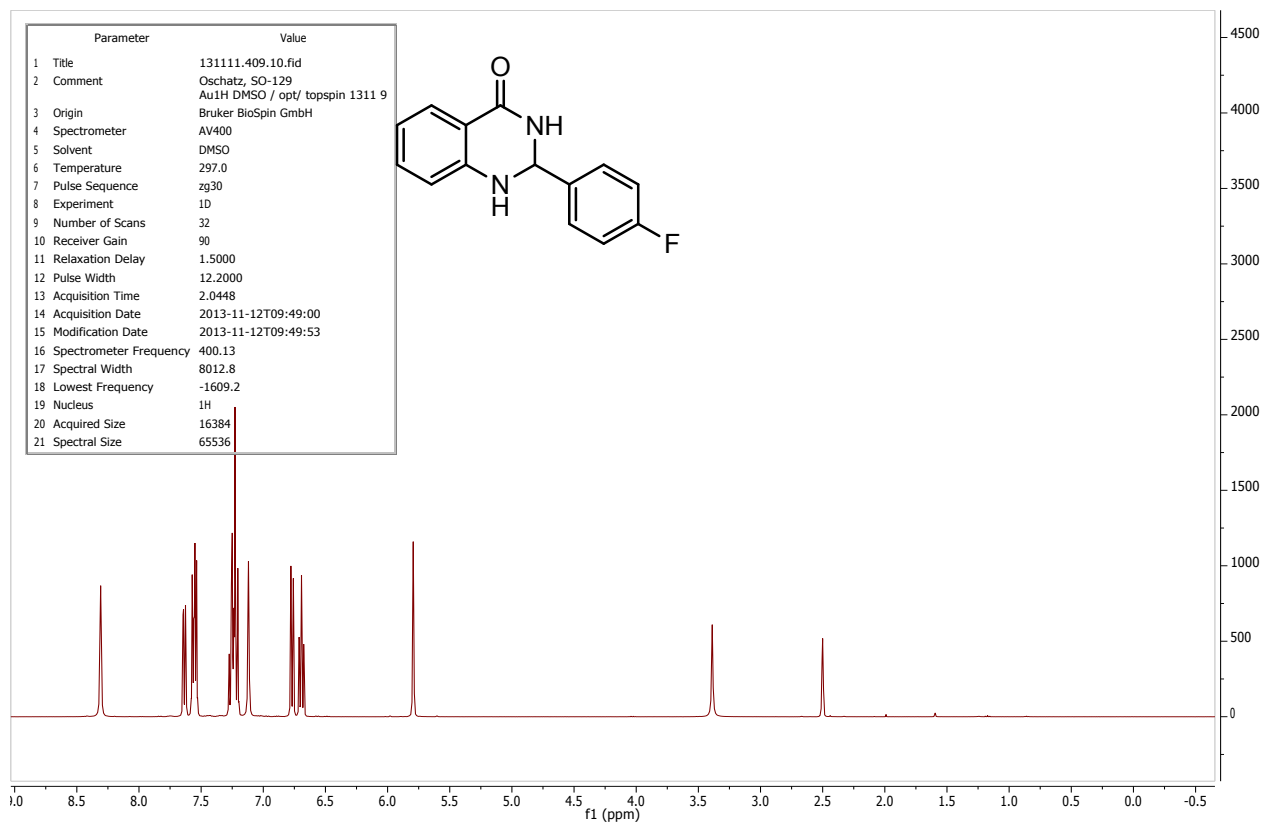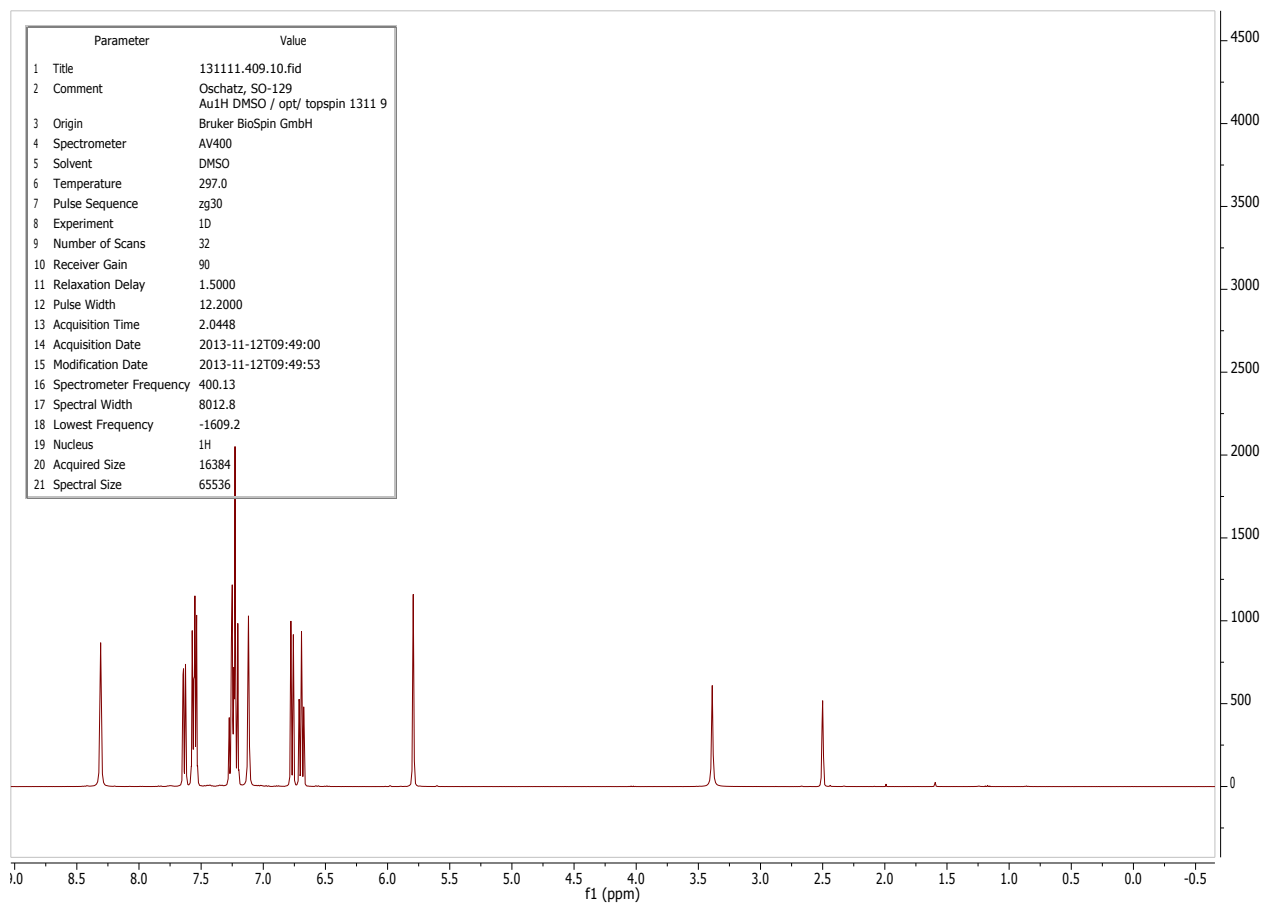

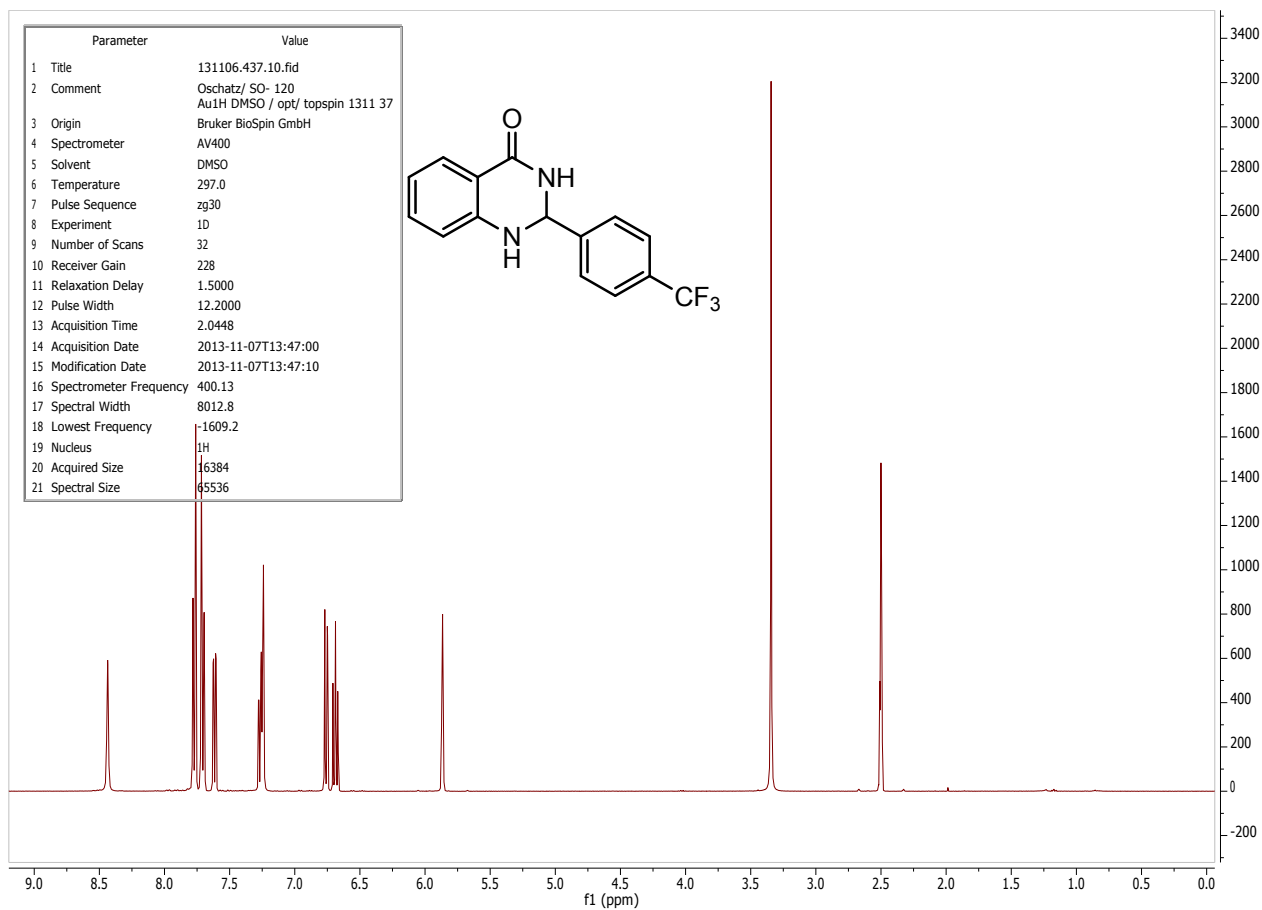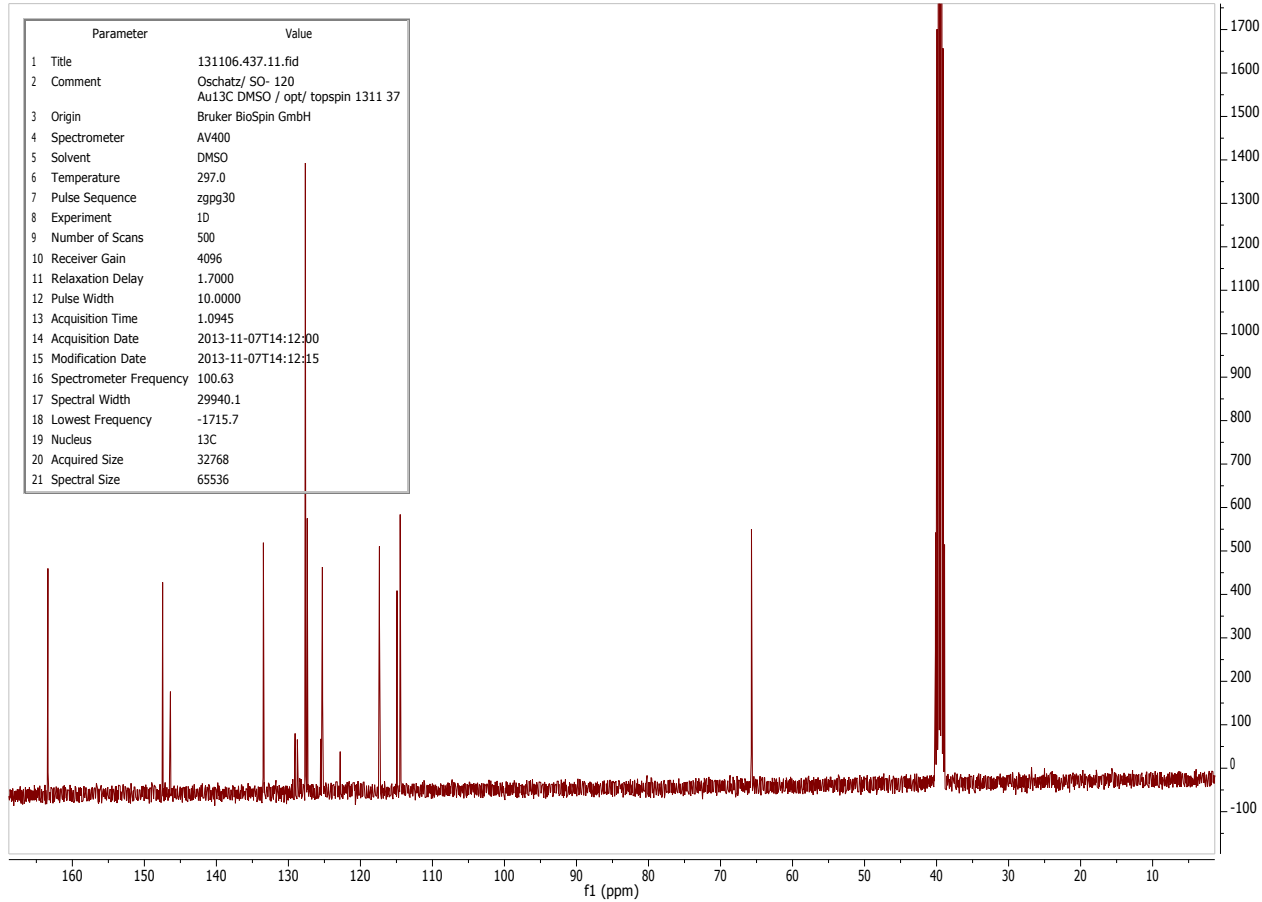

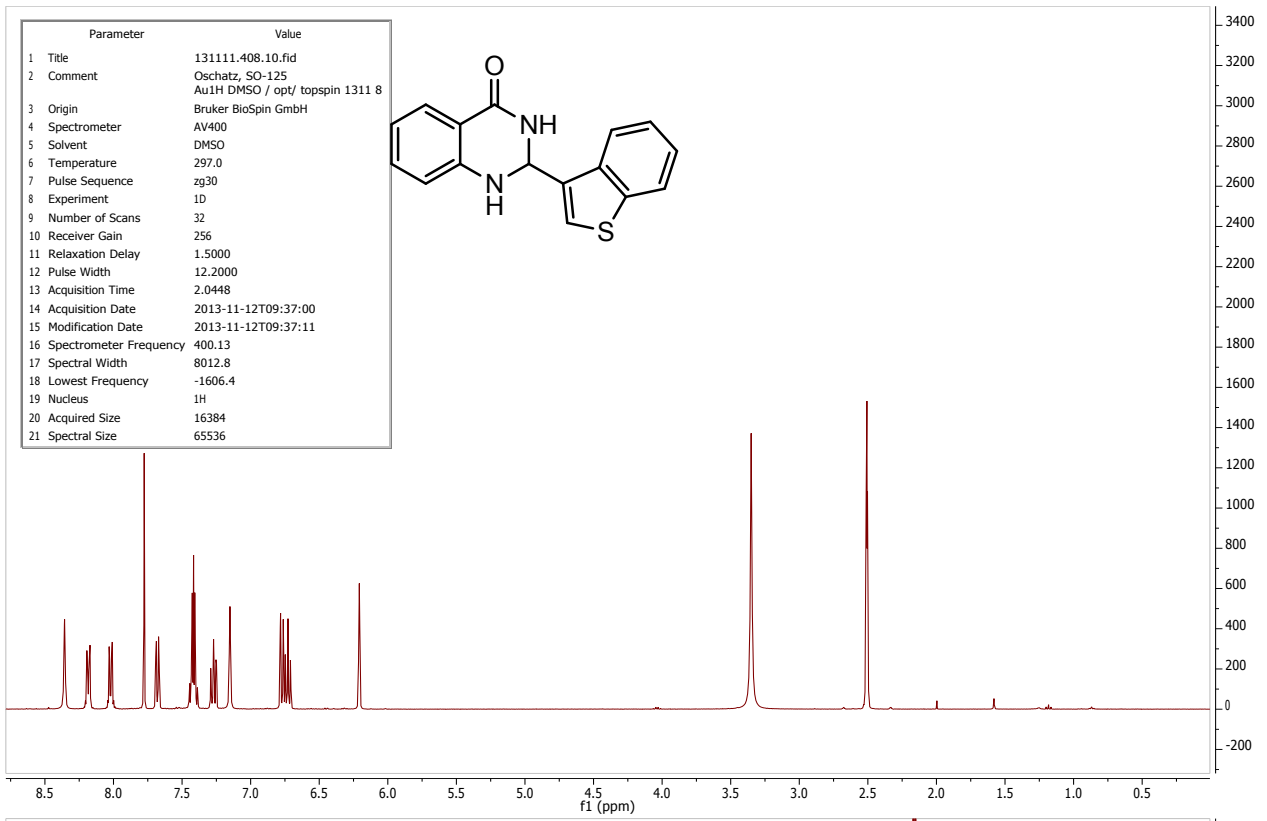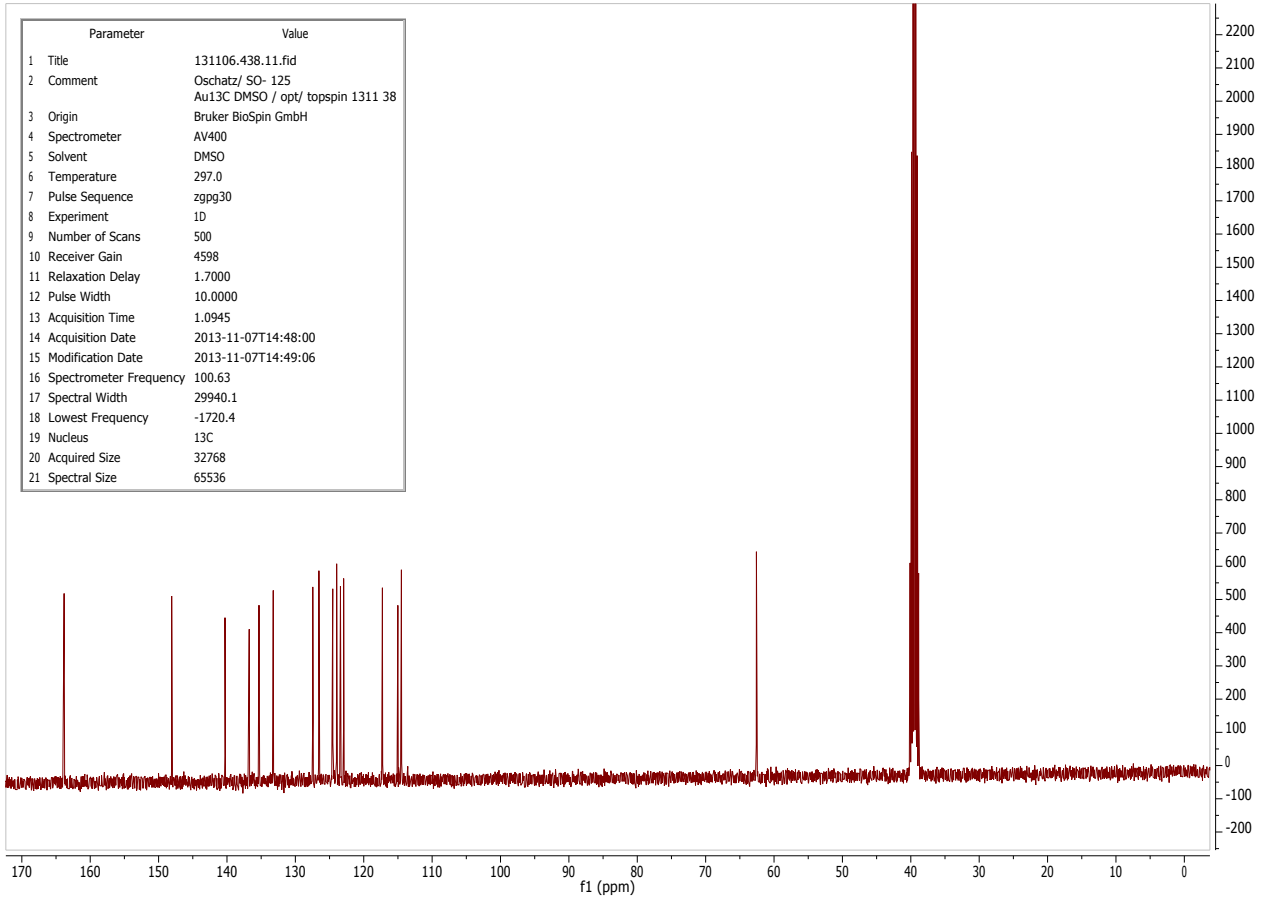

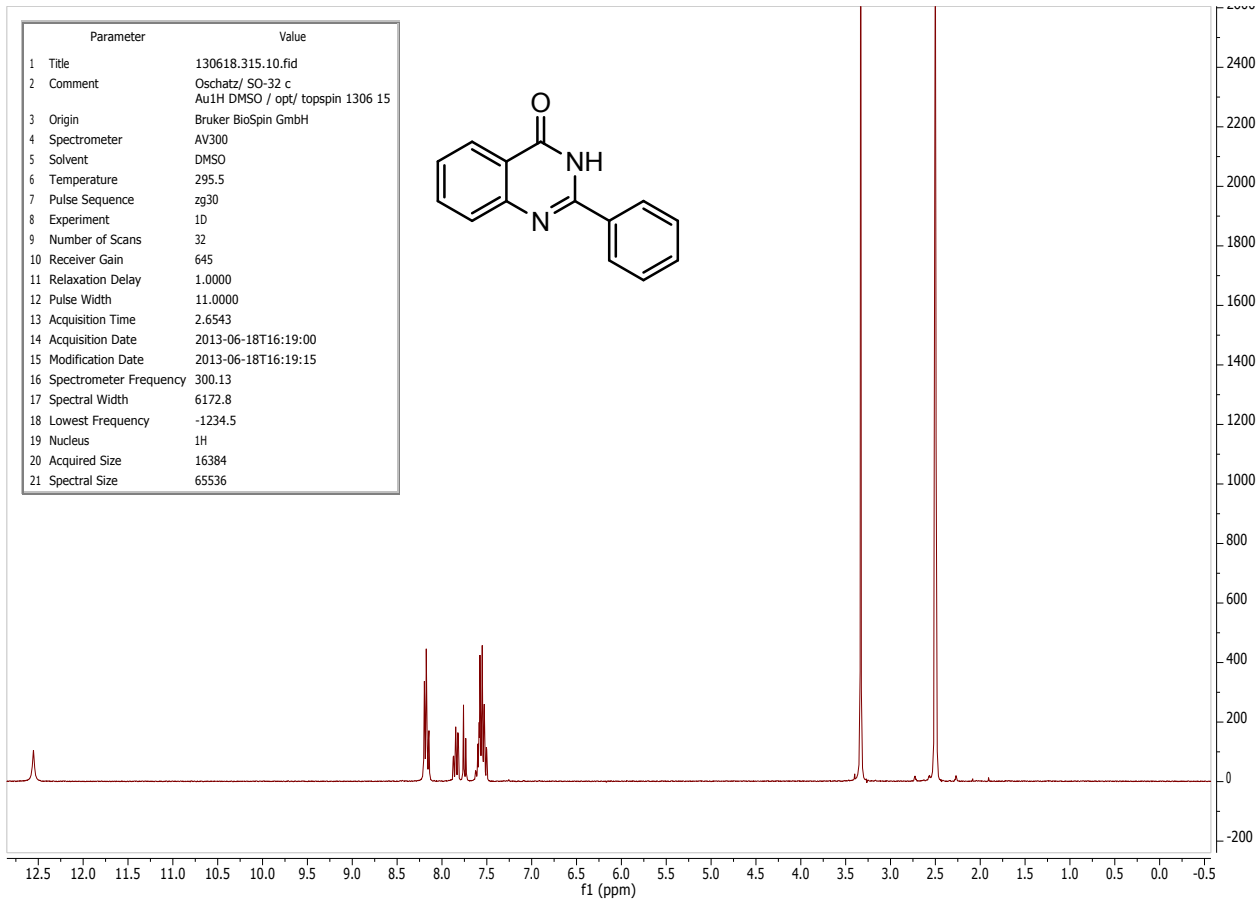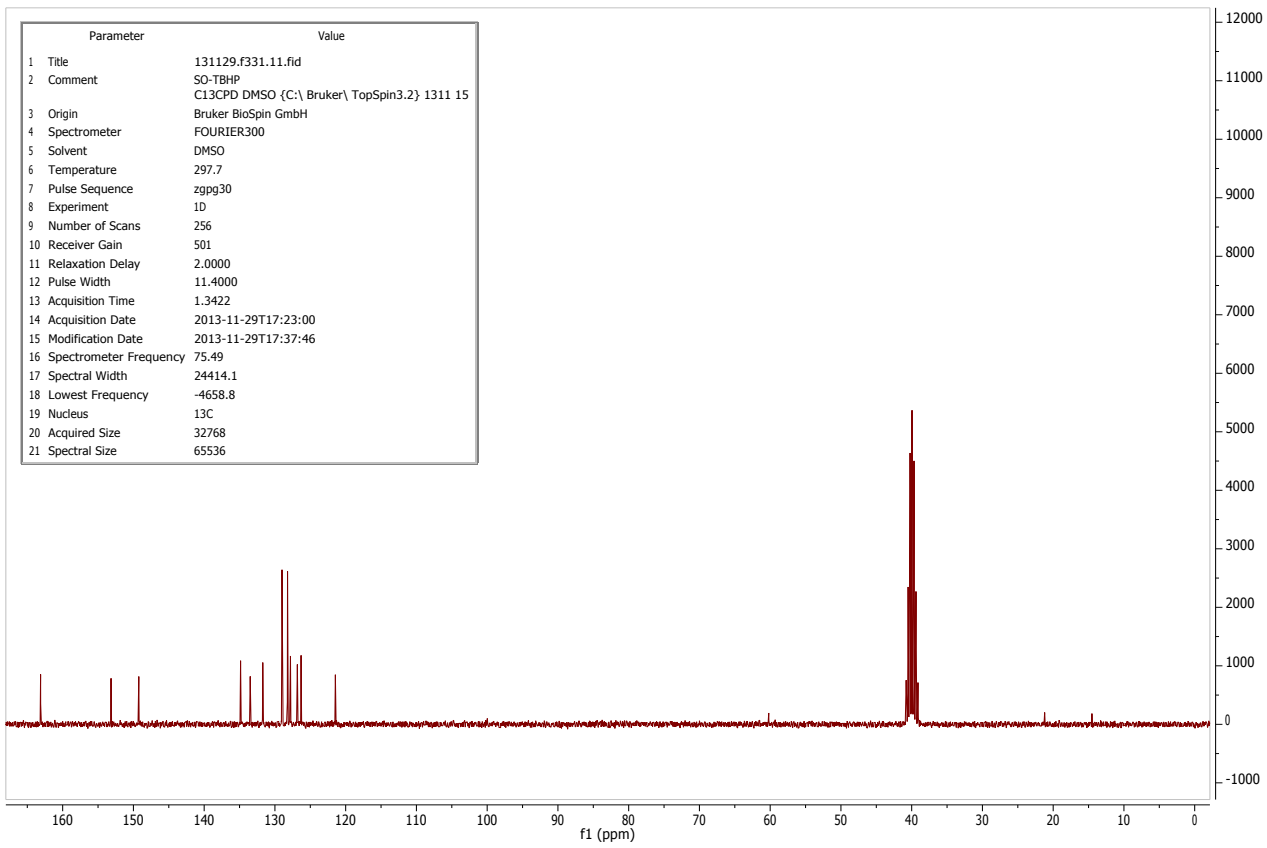

Supplement: c3ob42434k1.pdf [file c3ob42434k1.pdf]
