# Supplementary material for: Base mediated synthesis of 2-aryl-2,3-dihydroquinazolin-4(1H)-ones from 2-aminobenzonitriles and aromatic aldehydes in water
Source: Royal Society of Chemistry journal article supplement (doi:10.1039/c3ob42434k), 2014-01-01

## Supporting Information

### General remarks:

All Chemicals were commercial available and were used without further purification. NMR-data was recorded by a Bruker ARX 300 and Bruker ARX 400 spectrometers.  $^{13}\text{C}$ - and  $^1\text{H}$ -spectra were referenced to deuterated solvent signals. Peaks were characterized as singlet (*s*), doublet (*d*), doublet of doublet (*dd*), triplet (*t*), doublet of triplets (*dt*), quartet (*q*) and multiplet (*m*). Gas-chromatographie-mass-analysis was measured by an Agilent HP-5890 with Agilent HP-5973 Mass Selective Detector (EI) and HP-5-capillary column using helium as carrier gas. Column-chromatographie was carried out using Merck 60 Silica-Gel (0.043 - 0.06 mm) and distilled solvents were used.

### General experimental procedure:

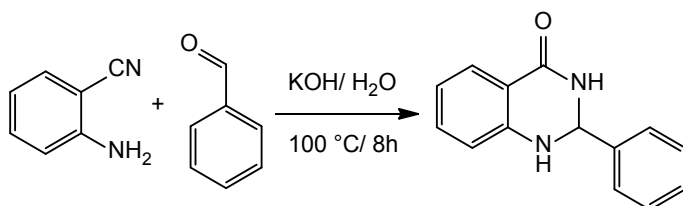

### 2-Phenyl-2,3-dihydroquinazolin-4(1H)-one

$^1\text{H-NMR}$  (250 MHz, DMSO-*d*<sub>6</sub>):  $\delta$  = 8.28 (*s*, 1H, NH(3)), 7.61 (*dd*, 1H,  $^3J$  = 7.8 Hz,  $^4J$  = 1.6 Hz, CH(5)), 7.49 (*dd*, 2H,  $^3J$  = 7.9 Hz,  $^4J$  = 1.9 Hz, CH(10 + 14)), 7.45 - 7.29 (*m*, 3H, CH(11 + 12 + 13)), 7.24 (*ddd*, 1H,  $^3J$  = 8.1 Hz,  $^3J$  = 7.2 Hz,  $^3J$  = 1.6 Hz, CH(7)), 7.11 (*s*, 1H, NH(1)), 6.78 - 6.72 (*m*, 1H, CH(8)), 6.71 - 6.63 (*m*, 1H, CH(6)), 5.75 (*t*, 1H,  $^3J$  = 1.9 Hz, CH(2));  $^{13}\text{C-NMR}$  (63 MHz, DMSO-*d*<sub>6</sub>):  $\delta$  = 163.6 (C=O(4)), 147.8 (C<sub>quart</sub>(8a)), 141.6 (C<sub>quart</sub>(9)), 133.3 (CH(7)), 128.4 (CH(12)), 128.3 (CH(11 + 13)), 127.3 (CH(5)), 126.8 (CH(10 + 14)), 117.1 (CH(6)), 114.9 (C<sub>quart</sub>(4a)), 114.4 (CH(8)), 66.5 (CH(2)) ppm; MS: (EI, 70 eV) *m/z* (%) = 224 ([M]<sup>+</sup>, 19), 223 (27), 147 (100), 120 (42), 119 (15), 104 (10), 92 (29), 77 (20), 65 (14), 64 (10), 51 (15).

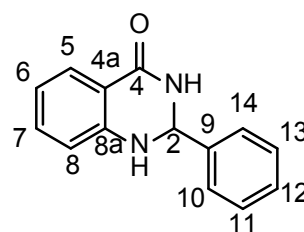

### 2-Phenyl-7-chloro-2,3-dihydroquinazolin-4(1H)-one

$^1\text{H-NMR}$  (300 MHz, DMSO-*d*<sub>6</sub>):  $\delta$  = 8.47 (*s*, 1H, NH(3)), 7.54 (*d*, 1H,  $^4J$  = 2.6 Hz, CH(8)), 7.50 - 7.45 (*m*, 2H, CH(10 + 14)), 7.44 - 7.34 (*m*, 3H, CH(11 + 12 + 13)), 7.34 - 7.32 (*m*, 1H, NH(1)), 7.28 (*dd*, 1H,  $^3J$  = 8.7 Hz,  $^4J$  = 2.7 Hz, CH(6)), 6.78 (*d*, 1H,  $^3J$  = 8.7 Hz, CH(8)), 5.78 (*dd*, 1H,  $^3J$  = 1.9 Hz,  $^3J$  = 1.9 Hz, CH(2)) ppm;  $^{13}\text{C-NMR}$  (75 MHz, DMSO-*d*<sub>6</sub>):  $\delta$  = 162.4 (C=O(4)), 146.6 (C<sub>quart</sub>(8a)), 141.2 (C<sub>quart</sub>(9)), 133.1 (C<sub>quart</sub>(7)), 128.6 (CH(12)), 128.4 (CH(11 + 13)), 126.8 (CH(10 + 14)), 126.4 (CH(5)), 120.7 (CH(6)), 116.4 (CH(8)), 116.0 (C<sub>quart</sub>(4a)), 66.4 (CH(2)) ppm; MS: (EI, 70 eV) *m/z* (%) = 259 ([M]<sup>+</sup>, 10), 258 (20), 257 (27), 183 (37), 182 (14), 181 (100), 156 (18), 155 (11), 154 (46), 153 (15), 126 (26), 104 (17), 90 (10), 77 (27), 63 (18), 51 (19).

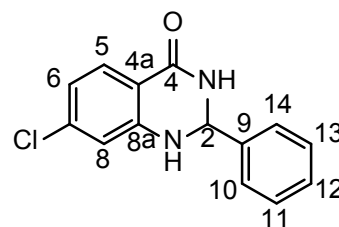

### 2-Phenyl-6-chloro-2,3-dihydroquinazolin-4(1H)-one

$^1\text{H-NMR}$  (300 MHz, DMSO-*d*<sub>6</sub>):  $\delta$  = 8.49 (*s*, 1H, NH(3)), 7.54 (*d*, 1H,  $^4J$  = 2.6 Hz, CH(5)), 7.50 - 7.45 (*m*, 2H, CH(10 + 14)), 7.44 - 7.35 (*m*, 3H, CH(11 + 12 + 13)), 7.34 (*s*, 1H, NH(1)), 7.28 (*dd*, 1H,  $^3J$  = 8.7 Hz,  $^4J$  = 2.6 Hz, CH(7)), 6.78 (*d*, 1H,  $^3J$  = 8.7 Hz, CH(8)), 5.78 (*dd*, 1H,  $^3J$  = 1.8 Hz,  $^3J$  = 1.8 Hz, CH(2)) ppm;  $^{13}\text{C-NMR}$  (75 MHz, DMSO-*d*<sub>6</sub>):  $\delta$  = 162.4 (C=O), 146.6 (C<sub>quart</sub>(8a)), 141.2 (C<sub>quart</sub>(9)), 133.1 (C<sub>quart</sub>(6)), 128.6 (CH(12)), 128.4 (CH(11 + 13)), 126.8 (CH(10 + 14)), 126.4 (CH(5)), 120.7 (CH(7)), 116.4 (CH(8)), 116.0 (C<sub>quart</sub>(4a)), 66.4 (CH(2)) ppm; MS: (EI, 70 eV) *m/z* (%) = 259 ([M]<sup>+</sup>, 10), 258 (23), 257 (27), 183 (30), 182 (11), 181 (100), 156 (12), 155 (10), 154 (34), 153 (18), 126 (22), 125 (10), 104 (12), 99 (10), 90 (11), 77 (24), 75 (10), 63 (16), 51 (15).

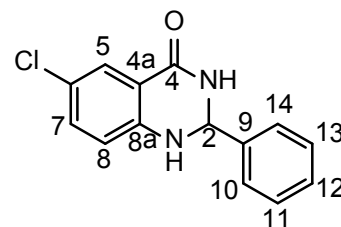

### 2-Phenyl-5-fluoro-2,3-dihydroquinazolin-4(1H)-one

$^1\text{H-NMR}$  (300 MHz, DMSO-*d*<sub>6</sub>):  $\delta$  = 8.33 (*s*, 1H, NH(3)), 7.51 - 7.45 (*m*, 3H, CH(10 + 14) + NH(1)), 7.44 - 7.34 (*m*, 3H, CH(11 + 12 + 13)), 7.21 (*ddd*, 1H,  $^3J$  = 8.2 Hz,  $^3J$  = 8.2 Hz,  $^4J$  = 5.8 Hz, CH(7)), 6.59 (*ddd*, 1H,  $^3J$  = 8.2 Hz,  $^4J$  = 0.7 Hz,  $^5J$  = 0.7 Hz, CH(8)), 6.39 (*ddd*, 1H,  $^3J$  = 11.5 Hz,  $^3J$  = 8.1 Hz,  $^4J$  = 1.0 Hz, CH(6)), 5.70 (*dd*, 1H,  $^3J$  = 1.9 Hz,  $^3J$  = 1.9 Hz, CH(2)) ppm;  $^{13}\text{C-NMR}$  (75 MHz, DMSO-*d*<sub>6</sub>):  $\delta$  = 162.3 (*d*,  $^1J$  = 256.7 Hz, CF(5)), 160.9 (*d*,  $^3J$  = 2.7

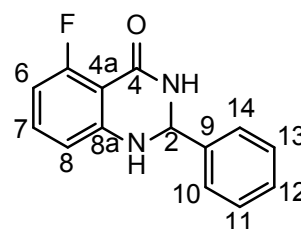

Hz, C=O(4)), 150.2 ( $d$ ,  $^3J = 4.0$  Hz,  $C_{\text{quart}}(8a)$ ), 141.0 ( $C_{\text{quart}}(9)$ ), 134.1 ( $d$ ,  $^3J = 11.5$  Hz, CH(7)), 128.6 (CH(12)), 128.4 (CH(11 + 13)), 126.9 (CH(10 + 14)), 110.5 ( $d$ ,  $^4J = 3.4$  Hz, CH(8)), 104.5 ( $d$ ,  $^2J = 21.3$  Hz, CH(6)), 103.83 ( $d$ ,  $^2J = 9.3$  Hz,  $C_{\text{quart}}(4a)$ ), 66.0 (CH<sub>2</sub>) ppm; MS: (EI, 70 eV)  $m/z$  (%) = 242 ( $[M]^+$ , 20), 241 (29), 166 (11), 165 (100), 138 (59), 137 (16), 110 (31), 82 (10), 77 (21), 51 (14).

### 2-Phenyl-6-methyl-2,3-dihydroquinazolin-4(1H)-one

$^1\text{H-NMR}$  (300 MHz, DMSO- $d_6$ ):  $\delta = 8.24$  (s, 1H, NH(3)), 7.51 – 7.46 ( $m$ , 2H, CH(10 + 14)), 7.44 – 7.26 ( $m$ , 4H, CH(5 + 11 + 12 + 13)), 7.07 ( $dd$ , 1H,  $^3J = 8.2$  Hz,  $^4J = 1.9$  Hz, CH(7)), 6.92 (s, 1H, NH(1)), 6.66 ( $d$ , 1H,  $^3J = 8.2$  Hz, CH(8)), 5.70 ( $dd$ , 1H,  $^3J = 1.9$  Hz, CH(2)), 2.18 (s, 3H, CH<sub>3</sub>) ppm;  $^{13}\text{C-NMR}$  (75 MHz, DMSO- $d_6$ ):  $\delta = 163.7$  (C=O(4)), 145.7 ( $C_{\text{quart}}(8a)$ ), 141.7 ( $C_{\text{quart}}(9)$ ), 134.1 ( $C_{\text{quart}}(6)$ ), 128.4 (CH(12)), 128.3 (CH(11 + 13)), 127.2 (CH(5)), 126.9 (CH(10 + 14)), 125.8 (CH(7)), 115.0 ( $C_{\text{quart}}(4a)$ ), 114.6 (CH(8)), 66.7 (CH(2)), 20.1 (CH<sub>3</sub>) ppm; MS: (EI, 70 eV)  $m/z$  (%) = 238 ( $[M]^+$ , 25), 237 (30), 236 (11), 162 (10), 161 (100), 134 (35), 133 (26), 106 (17), 79 (10), 78 (14), 77 (36), 51 (18).

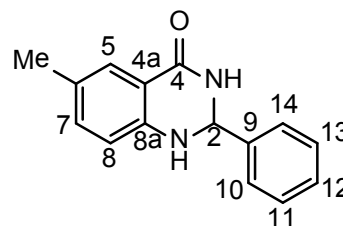

### 2-Phenyl-6,7-dimethoxy-2,3-dihydroquinazolin-4(1H)-one

$^1\text{H-NMR}$  (400 MHz, DMSO- $d_6$ ):  $\delta = 8.05$  (s, 1H, NH(3)), 7.53 – 7.45 ( $m$ , 2H, CH(10 + 14)), 7.43 – 7.29 ( $m$ , 3H, CH(11 + 12 + 13)), 7.11 (s, 1H, CH(5)), 6.79 (s, 1H, NH(1)), 6.37 (s, 1H, CH(8)), 5.68 ( $dd$ ,  $^3J = 1.9$  Hz,  $^3J = 1.9$  Hz, 1H, CH(2)), 3.72 (s, 3H, OMe), 3.67 (s, 3H, OMe) ppm;  $^{13}\text{C-NMR}$  (101 MHz, DMSO- $d_6$ ):  $\delta = 163.8$  (C=O(4)), 153.9 ( $C_{\text{quart}}(7)$ ), 143.6 ( $C_{\text{quart}}(8a)$ ), 141.7 ( $C_{\text{quart}}(9)$ ), 141.5 ( $C_{\text{quart}}(6)$ ), 128.4 (CH(12)), 128.2 (CH(11 + 13)), 126.8 (CH(10 + 14)), 109.8 ( $C_{\text{quart}}(4a)$ ), 106.6 (CH(5)), 97.9 (CH(8)), 66.9 (CH(2)), 55.8 (C(OMe)), 55.4 (C(OMe)) ppm; MS: (EI, 70 eV)  $m/z$  (%) = 285 (13), 284 ( $[M]^+$ , 61), 283 (35), 282 (31), 267 (29), 208 (16), 207 (100), 191 (12), 180 (39), 179 (23), 164 (21), 152 (10), 136 (24), 106 (14), 104 (27), 77 (26), 51 (13).

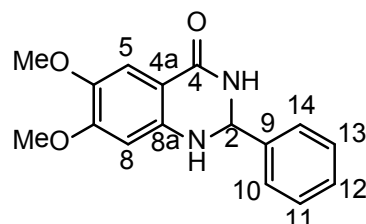

### 2-Phenyl-2,3-dihydropyrido[2,3-d]pyrimidin-4(1H)-one

$^1\text{H-NMR}$  (300 MHz, DMSO- $d_6$ ):  $\delta = 8.60$  (s, 1H, NH(3)), 8.14 ( $dd$ , 1H,  $^3J = 4.9$  Hz,  $^4J = 2.0$  Hz, CH(7)), 8.01 (s, 1H, NH(1)), 7.90 ( $dd$ , 1H,  $^3J = 7.5$ ,  $^4J = 2.0$  Hz, CH(5)), 7.62 – 7.14 ( $m$ , 5H, CH(10 + 11 + 12 + 13 + 14)), 6.70 ( $dd$ , 1H,  $^3J = 7.5$  Hz,  $^3J = 4.9$  Hz, CH(6)), 5.83 ( $dd$ , 1H,  $^3J = 2.5$  Hz,  $^3J = 2.5$  Hz, CH(2)) ppm;  $^{13}\text{C-NMR}$  (75 MHz, DMSO- $d_6$ ):  $\delta = 162.8$  (C=O(4)), 157.5 ( $C_{\text{quart}}(8a)$ ), 152.9 (CH(7)), 142.3 ( $C_{\text{quart}}(9)$ ), 135.7 (CH(5)), 128.4 (CH(12)), 128.3 (CH(11 + 13)), 126.3 (CH(10 + 14)), 113.8 (CH(6)), 109.5 ( $C_{\text{quart}}(4)$ ), 65.1 (CH(2)) ppm; MS: (EI, 70 eV)  $m/z$  (%) = 225 ( $[M]^+$ , 14), 224 (26), 148 (100), 121 (27), 93 (28), 77 (17), 51 (14).

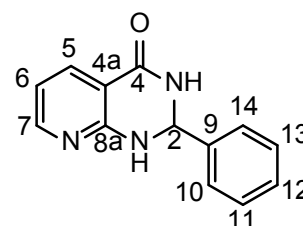

### 2-Cyclohexyl-2,3-dihydroquinazolin-4(1H)-one

$^1\text{H-NMR}$  (400 MHz, DMSO- $d_6$ ):  $\delta = 7.87$  (s, 1H, NH(3)), 7.55 ( $dd$ , 1H,  $^3J = 7.7$  Hz,  $^4J = 1.6$  Hz, CH(5)), 7.23 – 7.16 ( $m$ , 1H, CH(7)), 6.74 ( $dd$ , 1H,  $^3J = 8.2$  Hz,  $^4J = 1.1$  Hz, CH(8)), 6.60 ( $ddd$ , 1H,  $^3J = 7.4$  Hz,  $^3J = 7.3$  Hz,  $^4J = 1.1$  Hz, CH(6)), 6.55 (s, 1H, NH(1)), 4.44 ( $ddd$ , 1H,  $^3J = 4.2$  Hz,  $^3J = 1.9$  Hz,  $^3J = 1.9$  Hz, CH(2)), 1.77– 1.04 ( $m$ , 11H, CH<sub>2</sub>(Cy)) ppm;  $^{13}\text{C-NMR}$  (101 MHz, DMSO- $d_6$ ):  $\delta = 163.7$  (C=O(4)), 148.3 ( $C_{\text{quart}}(8a)$ ), 133.0 (CH(7)), 127.2 (CH(5)), 116.4 (CH(6)), 114.8 ( $C_{\text{quart}}(4a)$ ), 114.1 (CH(8)), 68.6 (CH(2)), 42.9 (CH<sub>2</sub>(Cy)), 27.0 (CH<sub>2</sub>(Cy)), 26.7 (CH<sub>2</sub>(Cy)), 25.9 (CH<sub>2</sub>(Cy)), 25.6 (CH<sub>2</sub>(Cy)), 25.6 (CH<sub>2</sub>(Cy)) ppm; MS: (EI, 70 eV)  $m/z$  (%) = 148 (10), 147 (100), 92 (10).

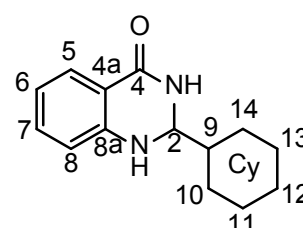

### 2-Isopropyl-2,3-dihydroquinazolin-4(1H)-one

$^1\text{H-NMR}$  (400 MHz, DMSO- $d_6$ ):  $\delta = 7.86$  (s, 1H, NH(3)), 7.57 ( $dd$ ,  $^3J = 7.8$  Hz,  $^4J = 1.6$  Hz, 1H, CH(5)), 7.20 ( $ddd$ , 1H,  $^3J = 8.5$  Hz,  $^3J = 7.2$  Hz,  $^4J = 1.7$  Hz, CH(7)), 6.75 ( $dd$ , 1H,  $^3J = 8.2$  Hz,  $^4J = 1.0$  Hz, CH(8)), 6.62 ( $ddd$ , 1H,  $^3J = 7.5$  Hz,  $^3J = 7.4$  Hz,  $^4J = 1.1$  Hz, CH(6)), 6.51 (s, 1H, NH(1)), 4.54 – 4.49 ( $m$ , 1H, CH(2)), 1.86 ( $m$ , 1H, CH(9)), 0.94 ( $d$ ,  $^3J = 6.9$  Hz, 3H, CH<sub>3</sub>), 0.92 ( $d$ ,  $^3J = 6.8$  Hz, 3H, CH<sub>3</sub>) ppm;  $^{13}\text{C-NMR}$  (101 MHz, DMSO- $d_6$ ):  $\delta = 163.9$  (C=O(4)), 148.5 ( $C_{\text{quart}}(8a)$ ), 133.0 (CH(7)), 127.2 (CH(5)), 116.5 (CH(6)), 114.7 ( $C_{\text{quart}}(4a)$ ), 114.1 (CH(8)), 69.2 (CH(2)), 32.7 (CH(9)), 16.9 (CH<sub>3</sub>), 16.6 (CH<sub>3</sub>) ppm; MS: (EI, 70 eV)  $m/z$  (%) = 147 (100), 92 (11), 65 (8).

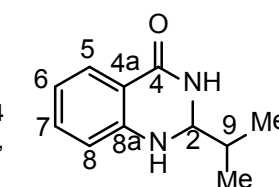

### 2-(4-Isopropylphenyl)-2,3-dihydroquinazolin-4(1H)-one

$^1\text{H-NMR}$  (400 MHz, DMSO- $d_6$ ):  $\delta = 8.21$  (s, 1H, NH(3)), 7.61 ( $dd$ , 1H,  $^3J = 7.8$  Hz,  $^4J = 1.6$  Hz, 1H, CH(5)), 7.46 – 7.37 ( $m$ , 2H, CH(10 + 14)), 7.32 – 7.18 ( $m$ , 3H, CH(11 + 13 + 7)),

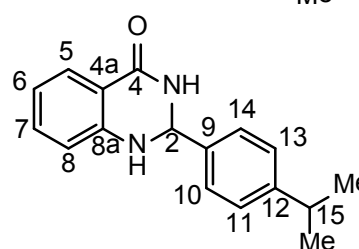

7.05 (s, 1H, NH(1)), 6.79 – 6.70 (*m*, 1H, CH(8)), 6.71 – 6.63 (*m*, 1H, CH(6)), 5.76 – 5.67 (*m*, 1H, CH(2)), 2.88 (*h*, 1H,  $^3J = 6.9$  Hz, CH(15)), 1.19 (*d*, 6H,  $^3J = 6.9$  Hz, CH<sub>3</sub>) ppm;  $^{13}\text{C-NMR}$  (75 MHz, DMSO-*d*<sub>6</sub>):  $\delta = 163.7$  (C=O(7)), 148.8 (C<sub>quart</sub>(12)), 148.0 (C<sub>quart</sub>(9)), 139.0 (C<sub>quart</sub>(8a)), 133.3 (CH(7)), 127.4 (CH(5)), 127.0 (CH(11 + 13)), 126.3 (CH(10 + 14)), 117.1 (CH(6)), 115.0 (C<sub>quart</sub>(4a)), 114.4 (CH(8)), 66.6 (CH(2)), 33.26 (CH(15)), 23.9 (CH<sub>3</sub>) ppm; MS: (EI, 70 eV) *m/z* (%) = 266 ([M]<sup>+</sup>, 28), 265 (53), 249 (13), 148 (12), 147 (100), 120 (46), 119 (13), 92 (27), 91 (10), 77 (12), 65 (12).

#### Crystal data and structure refinement for 2-(4-isopropylphenyl)-2,3-dihydroquinazolin-4(1H)-one

|                                    |                                                                                                                                                       |
|------------------------------------|-------------------------------------------------------------------------------------------------------------------------------------------------------|
| Empirical formula                  | C <sub>17</sub> H <sub>18</sub> N <sub>2</sub> O                                                                                                      |
| Formula weight                     | 266.33                                                                                                                                                |
| Temperature                        | 150(2) K                                                                                                                                              |
| Wavelength                         | 1.54178 Å                                                                                                                                             |
| Crystal system                     | monoclinic                                                                                                                                            |
| Space group (H.M.)                 | <i>P</i> 2 <sub>1</sub> / <i>c</i>                                                                                                                    |
| Unit cell dimensions               | <i>a</i> = 13.7868(3) Å $\alpha = 90.00^\circ$<br><i>b</i> = 9.5016(2) Å $\beta = 104.522(1)^\circ$<br><i>c</i> = 10.9971(3) Å $\gamma = 90.00^\circ$ |
| Volume                             | 1394.56(6) Å <sup>3</sup>                                                                                                                             |
| Z                                  | 4                                                                                                                                                     |
| Density (calculated)               | 1.269 Mg/m <sup>3</sup>                                                                                                                               |
| Absorption coefficient             | 0.628 mm <sup>-1</sup>                                                                                                                                |
| F(000)                             | 568                                                                                                                                                   |
| Crystal size                       | 0.44 x 0.42 x 0.08 mm <sup>3</sup>                                                                                                                    |
| $\theta$ range for data collection | 3.31 to 63.68°                                                                                                                                        |
| Index ranges                       | -16 ≤ <i>h</i> ≤ 14, -6 ≤ <i>k</i> ≤ 11, -12 ≤ <i>l</i> ≤ 12                                                                                          |
| Reflections collected              | 9161                                                                                                                                                  |
| Independent reflections            | 2282 [R(int) = 0.0225]                                                                                                                                |
| Absorption correction              | Semi-empirical from equivalents                                                                                                                       |
| Max. and min. transmission         | 1.000 and 0.903                                                                                                                                       |
| Refinement method                  | Full-matrix least squares on F <sup>2</sup>                                                                                                           |
| Data / restraints / parameters     | 2282 / 0 / 191                                                                                                                                        |
| Goodness-of-fit on F <sup>2</sup>  | 1.042                                                                                                                                                 |
| Final R indices [I > 2σ(I)]        | R1 = 0.0329, wR2 = 0.0857                                                                                                                             |
| R indices (all data)               | R1 = 0.0349, wR2 = 0.0878                                                                                                                             |

#### 2-(3,4-Dichlorophenyl)-2,3-dihydroquinazolin-4(1H)-one

$^1\text{H-NMR}$  (400 MHz, DMSO-*d*<sub>6</sub>):  $\delta = 8.42$  (s, 1H, NH(3)), 7.72 (*d*, 1H,  $^4J = 2.0$  Hz, CH(14)), 7.66 (*d*, 1H,  $^3J = 8.3$  Hz, CH(11)), 7.61 (*dd*, 1H,  $^3J = 7.7$  Hz,  $^4J = 1.6$  Hz, CH(5)), 7.47 (*dd*, 1H,  $^3J = 8.3$  Hz,  $^4J = 2.1$  Hz, CH(7)), 7.29 – 7.22 (*m*, 2H, NH(1) + CH(10)), 6.79 – 6.74 (*m*, 1H, CH(8)), 6.72 – 6.65 (*m*, 1H, CH(6)), 5.80 (*dd*, 1H,  $^3J = 2.3$  Hz,  $^3J = 2.3$  Hz, CH(2)) ppm;  $^{13}\text{C-NMR}$  (101 MHz, DMSO-*d*<sub>6</sub>):  $\delta = 163.4$  (C=O(4)), 147.3 C<sub>quart</sub>(8a), 143.0 (C<sub>quart</sub>(9)), 133.5 (CH(7)), 130.9 (C<sub>quart</sub>(13)), 130.8 (C<sub>quart</sub>(12)), 130.6 (CH(11)), 128.9 (CH(5)), 127.4 (CH(14)), 127.0 (CH(10)), 117.5 (CH(6)), 114.9 (C<sub>quart</sub>(4a)), 114.5 (CH(8)), 65.0 (CH(2)) ppm; MS: (EI, 70 eV) *m/z* (%) = 294 (10), 293 (12), 292 ([M]<sup>+</sup>, 15), 291 (16), 148 (10), 147 (100), 120 (44), 119 (21), 92 (30), 65 (12).

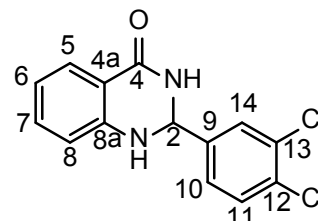

#### 2-(4-(Dimethylamino)phenyl)-2,3-dihydroquinazolin-4(1H)-one

$^1\text{H-NMR}$  (400 MHz, DMSO-*d*<sub>6</sub>):  $\delta = 8.07$  (s, 1H, NH(3)), 7.61 (*dd*,  $^3J = 7.7$  Hz,  $^4J = 1.6$  Hz, 1H, CH(5)), 7.33 – 7.27 (*m*, 2H, CH(10 + 14)), 7.22 (*ddd*, 1H,  $^3J = 7.9$  Hz,  $^3J = 7.1$  Hz,  $^4J = 1.6$  Hz, CH(7)), 6.91 (s, 1H, NH(1)), 6.75 – 6.69 (*m*, 3H, CH(8 + 11 + 13)), 6.69 – 6.63 (*m*, 1H, CH(6)), 5.65 – 5.62 (*m*, 1H, CH(2)), 3.34 (s, 6H, CH<sub>3</sub>) ppm;  $^{13}\text{C-NMR}$  (101 MHz, DMSO-*d*<sub>6</sub>):  $\delta = 163.8$  (C=O(4)), 150.7 (C<sub>quart</sub>(9)), 148.2 (C<sub>quart</sub>(8a)), 133.1 (CH(7)), 128.7 (CH(5)), 127.7 (C<sub>quart</sub>(12)), 127.3 (CH(10 + 14)), 116.9 (CH(6)), 115.0 (C<sub>quart</sub>(4a)), 114.4 (CH(8)), 111.9 (CH(11 + 13)), 66.6 (CH(2)), 40.16 (CH<sub>3</sub>) ppm; MS: (EI, 70 eV) *m/z* (%) = 266 ([M-H]<sup>+</sup>, 18), 265 (100), 264 (45), 146 (21), 145 (18), 119 (18).

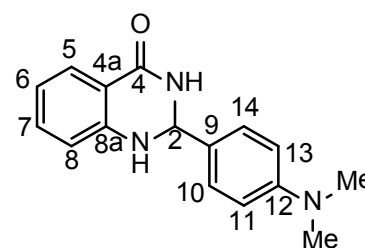

#### 2-(Pyridin-3-yl)-2,3-dihydroquinazolin-4(1H)-one

$^1\text{H-NMR}$  (300 MHz, DMSO-*d*<sub>6</sub>):  $\delta = 8.66$  (*d*, 1H,  $^4J = 2.3$  Hz, CH(10)), 8.55 (*dd*,  $^3J = 4.8$  Hz,  $^4J = 1.7$  Hz, CH(12)), 8.40 (s, 1H, NH(3)), 7.89 (*dd*,  $^3J = 8.0$  Hz,  $^4J = 2.0$  Hz, CH(14)), 7.63 (*dd*, 1H,  $^3J = 7.8$  Hz,  $^4J = 1.6$  Hz, CH(5)), 7.43 (*ddd*, 1H,  $^3J = 8.0$  Hz,  $^3J = 4.8$  Hz,  $^4J = 0.9$  Hz, CH(13)), 7.27 (*ddd*, 1H,  $^3J = 8.5$  Hz,  $^3J = 7.2$  Hz,  $^4J = 1.6$  Hz, CH(7)), 7.18 (s, 1H, NH(1)), 6.84 – 6.66 (*m*, 2H, CH(8 + 6)), 5.85 (*dd*, 1H,  $^3J = 1.8$  Hz,  $^3J = 1.8$  Hz, CH(2)) ppm;  $^{13}\text{C-NMR}$  (101 MHz, DMSO-*d*<sub>6</sub>):  $\delta = 163.6$  (C=O(4)), 149.7 (CH(10)), 148.4 (CH(12)), 147.7 (C<sub>quart</sub>(8a)),

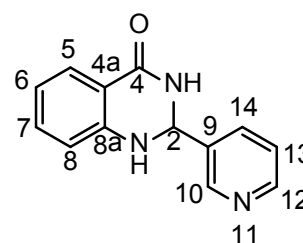

136.8 CH(14)), 134.7 (C<sub>quart</sub>(9)), 133.6 (CH(7)), 127.4 (CH(5)), 123.6 (CH(13)), 117.6 (CH(6)), 115.0 (C<sub>quart</sub>(4a)), 114.6 (CH(4)), 64.7 (CH(2)) ppm; MS: (EI, 70 eV) m/z (%) = 225 ([M]<sup>+</sup>, 15), 242 (12), 148 (11), 147 (100), 120 (35), 119 (19), 92 (31), 65 (14), 64 (11), 63 (11), 51 (18).

### 2-(4-(Trifluoromethoxy)phenyl)-2,3-dihydroquinazolin-4(1H)-one

<sup>1</sup>H-NMR (300 MHz, DMSO-*d*<sub>6</sub>): δ = 8.37 (s, 1H, NH(3)), 7.68 – 7.60 (*m*, 3H, CH(5 + 10 + 14)), 7.40 (*ddd*, 2H, <sup>3</sup>*J* = 7.8 Hz, <sup>3</sup>*J* = 2.1 Hz, <sup>5</sup>*J* = 1.1 Hz, CH(11 + 13)), 7.26 (*ddd*, 1H, <sup>3</sup>*J* = 8.1 Hz, <sup>3</sup>*J* = 7.2 Hz, <sup>4</sup>*J* = 1.6 Hz, CH(7)), 7.18 (s, 1H, NH(1)), 6.77 (*dd*, 1H, <sup>3</sup>*J* = 8.2 Hz, <sup>4</sup>*J* = 1.0 Hz, CH(8)), 6.74 – 6.66 (*m*, 1H, CH(6)), 5.83 (*dd*, 1H, <sup>3</sup>*J* = 1.9 Hz, <sup>3</sup>*J* = 1.9 Hz, CH(2)) ppm; <sup>13</sup>C-NMR (75 MHz, DMSO-*d*<sub>6</sub>): δ = 163.6 (C=O(4)), 148.4 (*d*, <sup>3</sup>*J* = 1.7 Hz, C<sub>quart</sub>(12)), 147.7 (C<sub>quart</sub>(8a)), 141.0 (C<sub>quart</sub>(9)), 133.5 (CH(7)), 129.0 (CH(10 + 14)), 127.4 (CH(5)), 121.02 (CH(11 + 13)), 120.11 (*q*, <sup>3</sup>*J* = 256.3 Hz, OCF<sub>3</sub>), 117.4 (CH(6)), 114.9 (C<sub>quart</sub>(4a)), 114.5 (CH(8)), 65.9 (CH(2)) ppm; <sup>19</sup>F-NMR (282 MHz, DMSO-*d*<sub>6</sub>): δ = -56.47 (s, OCF<sub>3</sub>) ppm; MS: (EI, 70 eV) m/z (%) = 308 ([M]<sup>+</sup>, 32), 307 (45), 188 (10), 148 (10), 147 (100), 120 (63), 119 (27), 95 (10), 92 (44), 91 (10), 69 (24), 65 (20), 64 (16), 63 (15).

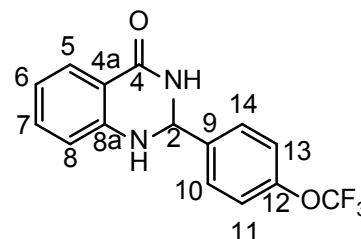

### 2-(4-Methoxyphenyl)-2,3-dihydroquinazolin-4(1H)-one

<sup>1</sup>H-NMR (300 MHz, DMSO-*d*<sub>6</sub>): δ = 8.21 (s, 1H, NH(3)), 7.62 (*dd*, 1H, <sup>3</sup>*J* = 7.8 Hz, <sup>4</sup>*J* = 1.6 Hz, CH(5)), 7.48 – 7.38 (*m*, 2H, CH(10 + 14)), 7.24 (*ddd*, 1H, <sup>3</sup>*J* = 8.1 Hz, <sup>3</sup>*J* = 7.2 Hz, <sup>4</sup>*J* = 1.6 Hz, CH(7)), 7.05 (s, 1H, NH(1)), 6.99 – 6.90 (*m*, 2H, CH(11 + 13)), 6.75 (*ddd*, 1H, <sup>3</sup>*J* = 8.2 Hz, <sup>4</sup>*J* = 1.1, <sup>5</sup>*J* = 0.5 Hz, CH(8)), 6.68 (*ddd*, 1H, <sup>3</sup>*J* = 7.7 Hz, <sup>3</sup>*J* = 7.2 Hz, <sup>4</sup>*J* = 1.1 Hz, CH(6)), 5.72 (*dd*, 1H, <sup>3</sup>*J* = 1.7 Hz, <sup>3</sup>*J* = 1.7 Hz, CH(2)), 3.74 (s, 3H, CH<sub>3</sub>) ppm; <sup>13</sup>C-NMR (101 MHz, DMSO-*d*<sub>6</sub>): δ = 163.7 (C=O(4)), 159.4 (C<sub>quart</sub>(12)), 148.0 (C<sub>quart</sub>(8a)), 133.5 (CH(7)), 133.3 (C<sub>quart</sub>(9)), 128.2 (CH(10 + 14)), 127.4 (CH(5)), 117.1 (CH(6)), 115.0 (C<sub>quart</sub>(4a)), 114.4 (CH(8)), 113.6 (CH(11 + 13)), 66.3 (CH(2)), 55.2 (OMe) ppm; MS: (EI, 70 eV) m/z (%) = 254 ([M]<sup>+</sup>, 50), 253 (100), 252 (16), 147 (70), 134 (13), 120 (75), 119 (31), 92 (49), 91 (17), 77 (16), 65 (21), 64 (20), 63 (17).

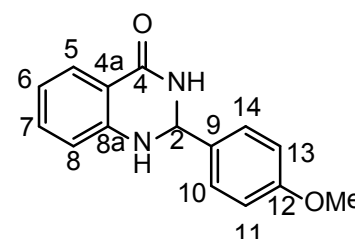

### 2-(4-Fluorophenyl)-2,3-dihydroquinazolin-4(1H)-one

<sup>1</sup>H-NMR (400 MHz, DMSO-*d*<sub>6</sub>): δ = 8.31 (s, 1H, NH(3)), 7.63 (*dd*, 1H, <sup>3</sup>*J* = 7.8 Hz, <sup>4</sup>*J* = 1.6 Hz, CH(5)), 7.59 – 7.52 (*m*, 2H, CH(10 + 14)), 7.30 – 7.18 (*m*, 3H, CH(7 + 11 + 13)), 7.12 (s, 1H, NH(1)), 6.77 (*dd*, 1H, <sup>3</sup>*J* = 8.2 Hz, <sup>4</sup>*J* = 1.0 Hz, CH(8)), 6.69 (*ddd*, 1H, <sup>3</sup>*J* = 7.5 Hz, <sup>3</sup>*J* = 7.4 Hz, <sup>4</sup>*J* = 1.0 Hz, CH(6)), 5.79 (*dd*, 1H, <sup>3</sup>*J* = 1.7 Hz, <sup>3</sup>*J* = 1.7 Hz, CH(2)) ppm; <sup>13</sup>C-NMR (101 MHz, DMSO-*d*<sub>6</sub>): δ = 163.6 (C=O(4)), 162.1 (*d*, <sup>1</sup>*J* = 244.1 Hz, C<sub>quart</sub>(12)), 147.8 (C<sub>quart</sub>(8a)), 137.8 (*d*, <sup>4</sup>*J* = 2.9 Hz, C<sub>quart</sub>(9)), 133.4 (CH(7)), 129.1 (*d*, <sup>3</sup>*J* = 8.3 Hz, CH(10 + 14)), 127.4 (CH(5)), 117.3 (CH(6)), 115.1 (*d*, <sup>2</sup>*J* = 21.5 Hz, CH(11 + 13)), 115.0 (C<sub>quart</sub>(4a)), 114.5 (CH(8)), 66.0 (CH(2)) ppm; <sup>19</sup>F-NMR (282 MHz, DMSO-*d*<sub>6</sub>): δ = -112.44 – -114.78 (*m*, CF) ppm; MS: (EI, 70 eV) m/z (%) = 242 ([M]<sup>+</sup>, 32), 241 (45), 148 (10), 147 (100), 122 (11), 120 (76), 119 (23), 95 (12), 92 (40), 65 (17), 64 (11).

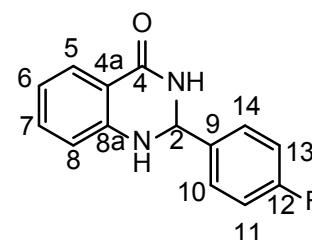

### 2-(4-cyanophenyl)-2,3-dihydroquinazolin-4(1H)-one

<sup>1</sup>H-NMR (300 MHz, DMSO-*d*<sub>6</sub>): δ = 8.49 – 8.44 (*m*, 1H, NH(3)), 7.90 – 7.82 (*m*, 2H, ), 7.68 – 7.63 (*m*, 2H), 7.60 (*dd*, 1H, <sup>3</sup>*J* = 7.7 Hz, <sup>4</sup>*J* = 1.6 Hz, CH(5)), 7.33 – 7.20 (*m*, 2H, CH(7) + NH(1)), 6.75 (*dd*, 1H, <sup>3</sup>*J* = 8.1 Hz, <sup>4</sup>*J* = 1.1 Hz, CH(8)), 6.68 (*ddd*, 1H, <sup>3</sup>*J* = 7.5 Hz, <sup>3</sup>*J* = 7.5 Hz, <sup>4</sup>*J* = 1.1 Hz, CH(6)), 5.84 (*dd*, 1H, <sup>3</sup>*J* = 2.4 Hz, <sup>3</sup>*J* = 2.4 Hz, CH(2)); <sup>13</sup>C-NMR (75 MHz, DMSO): δ = 163.3 (C=O(4)), 147.4 (C<sub>quart</sub>(9)), 147.3 (C<sub>quart</sub>(8a)), 133.6 (CH(7)), 132.4 (CH(10 + 14)), 127.7 (11 + 13), 127.4 (CH(5)), 118.7 (CN(15)), 117.4 (CH(6)), 114.9 (C<sub>quart</sub>(4a)), 114.5 (CH(8)), 111.1 (C<sub>quart</sub>(12)), 65.5 (CH(2)); MS: (EI, 70 eV) m/z (%) = 249 ([M]<sup>+</sup>, 18), 248 (18), 148 (10), 147 (100), 120 (40), 119 (20), 102 (10), 92 (25), 65 (10).

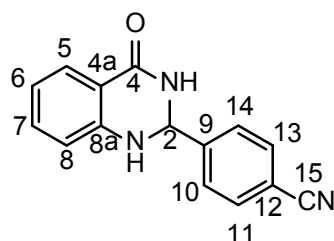

### 2-(4-(Trifluoromethyl)phenyl)-2,3-dihydroquinazolin-4(1H)-one

<sup>1</sup>H-NMR (400 MHz, DMSO-*d*<sub>6</sub>): δ = 8.44 (*m*, 1H, NH(3)), 7.77 (*d*, 2H, <sup>3</sup>*J* = 8.3 Hz, CH(11 + 13)), 7.71 (*d*, 1H, <sup>3</sup>*J* = 8.2 Hz, CH(10 + 14)), 7.62 (*dd*, 1H, <sup>3</sup>*J* = 7.8 Hz, <sup>4</sup>*J* = 1.6 Hz, CH(5)), 7.31 – 7.20 (*m*, 2H, CH(7) + NH(1)), 6.76 (*dd*, 1H, <sup>3</sup>*J* = 8.2 Hz, <sup>4</sup>*J* = 1.0 Hz, CH(8)), 6.69 (*ddd*, 1H, <sup>3</sup>*J* = 8.1 Hz, <sup>3</sup>*J* = 7.3 Hz, <sup>4</sup>*J* = 1.1 Hz, CH(6)), 5.87 (*dd*, 1H, <sup>3</sup>*J* = 2.2 Hz, <sup>3</sup>*J* = 2.2 Hz, CH(2)) ppm; <sup>13</sup>C-NMR (101 MHz, DMSO-*d*<sub>6</sub>): δ = 163.4 (C=O(4)), 147.5 (C<sub>quart</sub>(8a)), 146.4 (C<sub>quart</sub>(9)), 133.5 (CH(7)), 128.9 (*q*, <sup>2</sup>*J* = 31.6 Hz, CH(12)), 127.7 (CH(10 + 14)), 127.4 (CH(5)), 125.31 (*q*, <sup>3</sup>*J* = 3.7 Hz, CH(11 + 13)), 124.16 (*q*, <sup>1</sup>*J* = 272.2 Hz, CF<sub>3</sub>), 117.4 (CH(6)), 114.9 (CH(4a)), 114.5 (CH(8)), 65.7 (CH(2)) ppm; <sup>19</sup>F-NMR (282 MHz, DMSO-*d*<sub>6</sub>): δ = -60.59 (CF<sub>3</sub>) ppm; MS: (EI, 70 eV) m/z (%) = 292 ([M]<sup>+</sup>, 23), 291 (24), 148 (10), 147 (100),

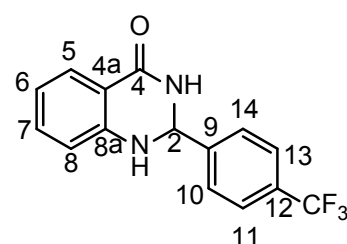

120 (43), 119 (20), 92 (27), 65 (10).

## 2-(Benzo[*b*]thiophen-3-yl)-2,3-dihydroquinazolin-4(1*H*)-one

<sup>1</sup>H-NMR (400 MHz, DMSO-*d*<sub>6</sub>): δ = 8.35 (s, 1H, NH(3)), 8.21 – 8.14 (*m*, 1H, CH(12)), 8.05 – 7.96 (*m*, 1H, CH(15)), 7.77 (s, 1H, CH(10)), 7.67 (*dd*, 1H, <sup>3</sup>*J* = 7.8 Hz, <sup>4</sup>*J* = 1.6 Hz, (CH(5)), 7.46 – 7.36 (*m*, 2H, CH(13 + 14)), 7.26 (*ddd*, 1H, <sup>3</sup>*J* = 8.3 Hz, <sup>3</sup>*J* = 7.2 Hz, <sup>4</sup>*J* = 1.6 Hz, (CH(7)), 7.14 (s, 1H, NH(1)), 6.77 (*dd*, 1H, <sup>3</sup>*J* = 8.2 Hz, <sup>4</sup>*J* = 1.0 Hz, CH(8)), 6.72 (*ddd*, 1H, <sup>3</sup>*J* = 7.5 Hz, <sup>4</sup>*J* = 1.0 Hz, CH(6)), 6.20 (*dd*, 1H, <sup>3</sup>*J* = 1.5 Hz, CH(2)) ppm; <sup>13</sup>C-NMR (101 MHz, DMSO): δ = 163.9 (C=O), 148.1 (C<sub>quart</sub>(8a)), 140.3 (C<sub>quart</sub>(9)), 136.8 (C<sub>quart</sub>(11a)), 135.4 (C<sub>quart</sub>(15a)), 133.3 (CH(7)), 127.5 (CH(5)), 126.6 (CH(13)), 124.6 (CH(14)), 124.0 CH(15)), 123.5 (CH(10)), 123.0 (CH(12)), 117.3 CH(6)), 115.1 (C<sub>quart</sub>(4a)), 114.5 (CH(8)), 62.6 (CH(2)) ppm; MS: (EI, 70 eV) *m/z* (%) = 281 (16), 280 ([M]<sup>+</sup>, 74), 279 100, 160 (16), 147 (51), 134 (17), 120 (94), 119 (20), 92 (39), 89 (20), 95 (15), 63 (10).

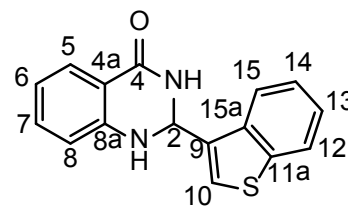

## 2-phenyl-quinazolinone

Experimental procedure:

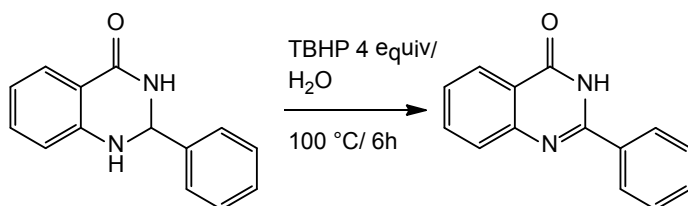

<sup>1</sup>H-NMR (300 MHz, DMSO-*d*<sub>6</sub>): δ = 12.55 (s, 1H, NH), 8.23 – 8.13 (*m*, 3H, CH(7 + 10 + 14)), 7.85 (*ddd*, <sup>3</sup>*J* = 8.5 Hz, <sup>3</sup>*J* = 7.0 Hz, <sup>3</sup>*J* = 1.6 Hz, CH(5)), 7.77 – 7.71 (*m*, 1H, CH(12)), 7.62 – 7.49 (*m*, 4H, CH(4 + 6 + 11 + 13)) ppm; <sup>13</sup>C-NMR (75 MHz, DMSO-*d*<sub>6</sub>): δ = 162.3 (C=O(4)), 152.4 (C<sub>quart</sub>(2)), 148.7 (C<sub>quart</sub>(8a)), 134.6 (CH(7)), 132.8 (C<sub>quart</sub>(9)), 131.4 (CH(12)), 128.6 (CH(10 + 14)), 127.8 (CH(11 + 13)), 127.4 CH(6), 126.6 (CH(7)), 125.8 (CH(5)), 121.0 (C<sub>quart</sub>(4a)) ppm; MS (EI, 70 eV): *m/z* (%) = 222 ([M]<sup>+</sup>, 100), 119 (99), 104 (11), 92 (14), 90 (17), 77 (22), 76 (11), 51 (10).

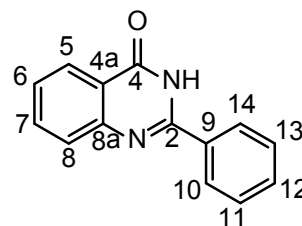

| Parameter                 | Value                 |
|---------------------------|-----------------------|
| 1 Title                   | 131018.205.10.fid     |
| 2 Comment                 | Oschatz SO-46 1H DMSO |
| 3 Origin                  | Bruker BioSpin GmbH   |
| 4 Spectrometer            | spect                 |
| 5 Solvent                 | DMSO                  |
| 6 Temperature             | 298.2                 |
| 7 Pulse Sequence          | zg30                  |
| 8 Experiment              | 1D                    |
| 9 Number of Scans         | 16                    |
| 10 Receiver Gain          | 362                   |
| 11 Relaxation Delay       | 1.0000                |
| 12 Pulse Width            | 10.0000               |
| 13 Acquisition Time       | 6.3439                |
| 14 Acquisition Date       | 2013-10-18T22:12:00   |
| 15 Modification Date      | 2013-10-18T22:13:16   |
| 16 Spectrometer Frequency | 250.13                |
| 17 Spectral Width         | 5165.3                |
| 18 Lowest Frequency       | -1038.0               |
| 19 Nucleus                | 1H                    |
| 20 Acquired Size          | 32768                 |
| 21 Spectral Size          | 65536                 |

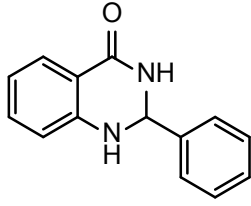

18000  
17000  
16000  
15000  
14000  
13000  
12000  
11000  
10000  
9000  
8000  
7000  
6000  
5000  
4000  
3000  
2000  
1000  
0  
-1000

f1 (ppm)

| Parameter                 | Value                  |
|---------------------------|------------------------|
| 1 Title                   | 131018.205.11.fid      |
| 2 Comment                 | Oschatz SO-46 13C DMSO |
| 3 Origin                  | Bruker BioSpin GmbH    |
| 4 Spectrometer            | spect                  |
| 5 Solvent                 | DMSO                   |
| 6 Temperature             | 298.0                  |
| 7 Pulse Sequence          | zgpg30                 |
| 8 Experiment              | 1D                     |
| 9 Number of Scans         | 3072                   |
| 10 Receiver Gain          | 2050                   |
| 11 Relaxation Delay       | 2.0000                 |
| 12 Pulse Width            | 10.0000                |
| 13 Acquisition Time       | 2.1846                 |
| 14 Acquisition Date       | 2013-10-19T01:51:00    |
| 15 Modification Date      | 2013-10-19T01:52:08    |
| 16 Spectrometer Frequency | 62.90                  |
| 17 Spectral Width         | 15000.0                |
| 18 Lowest Frequency       | -1242.4                |
| 19 Nucleus                | 13C                    |
| 20 Acquired Size          | 32768                  |
| 21 Spectral Size          | 65536                  |

85000  
80000  
75000  
70000  
65000  
60000  
55000  
50000  
45000  
40000  
35000  
30000  
25000  
20000  
15000  
10000  
5000  
0  
-5000

f1 (ppm)

| Parameter                 | Value (f2, f1)          |
|---------------------------|-------------------------|
| 1 Title                   | 131018.205.13.ser       |
| 2 Comment                 | Oschatz SO-46 COSY DMSO |
| 3 Origin                  | Bruker BioSpin GmbH     |
| 4 Spectrometer            | spect                   |
| 5 Solvent                 | DMSO                    |
| 6 Temperature             | 298.1                   |
| 7 Pulse Sequence          | cosygpqf                |
| 8 Experiment              | COSY                    |
| 9 Number of Scans         | 4                       |
| 10 Receiver Gain          | 203                     |
| 11 Relaxation Delay       | 1.1977                  |
| 12 Pulse Width            | 10.0000                 |
| 13 Acquisition Time       | 0.5960                  |
| 14 Acquisition Date       | 2013-10-19T02:30:00     |
| 15 Modification Date      | 2013-10-19T02:46:10     |
| 16 Spectrometer Frequency | (250.13, 250.13)        |
| 17 Spectral Width         | (1718.2, 1718.2)        |
| 18 Lowest Frequency       | (490.5, 490.5)          |
| 19 Nucleus                | (1H, 1H)                |
| 20 Acquired Size          | (1024, 128)             |
| 21 Spectral Size          | (1024, 1024)            |

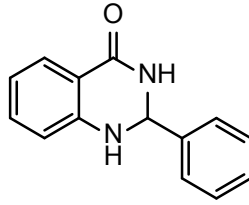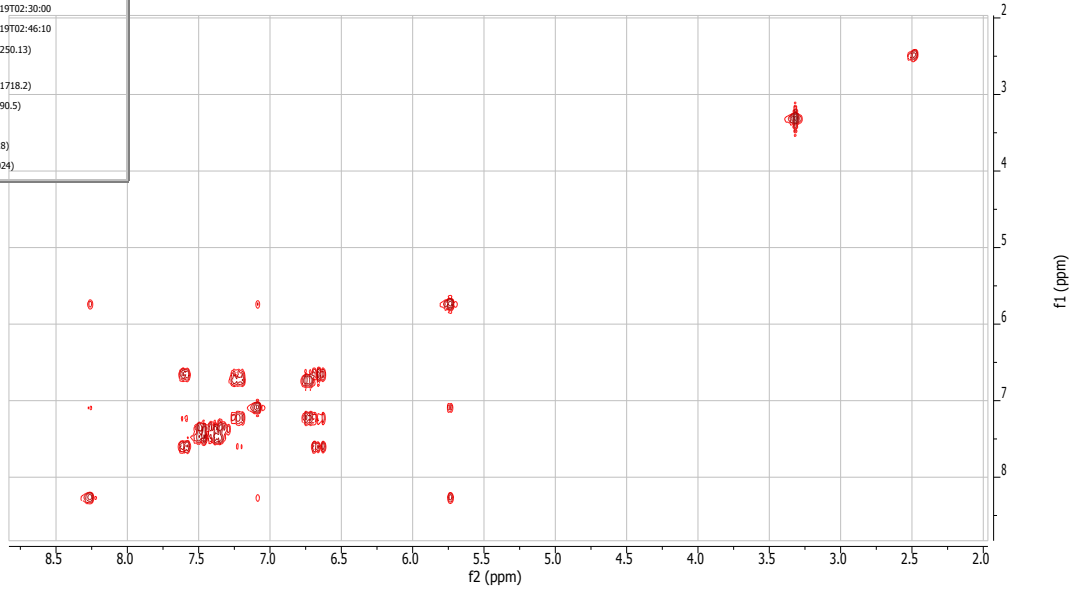

| Parameter                 | Value (f2, f1)           |
|---------------------------|--------------------------|
| 1 Title                   | 131018.205.14.ser        |
| 2 Comment                 | Oschatz SO-46 NOESY DMSO |
| 3 Origin                  | Bruker BioSpin GmbH      |
| 4 Spectrometer            | spect                    |
| 5 Solvent                 | DMSO                     |
| 6 Temperature             | 298.2                    |
| 7 Pulse Sequence          | noesyph                  |
| 8 Experiment              | NOESY                    |
| 9 Number of Scans         | 16                       |
| 10 Receiver Gain          | 203                      |
| 11 Relaxation Delay       | 1.8050                   |
| 12 Pulse Width            | 10.0000                  |
| 13 Acquisition Time       | 0.5960                   |
| 14 Acquisition Date       | 2013-10-19T02:48:00      |
| 15 Modification Date      | 2013-10-19T06:42:08      |
| 16 Spectrometer Frequency | (250.13, 250.13)         |
| 17 Spectral Width         | (1718.2, 1718.2)         |
| 18 Lowest Frequency       | (490.5, 490.5)           |
| 19 Nucleus                | (1H, 1H)                 |
| 20 Acquired Size          | (1024, 256)              |
| 21 Spectral Size          | (1024, 1024)             |

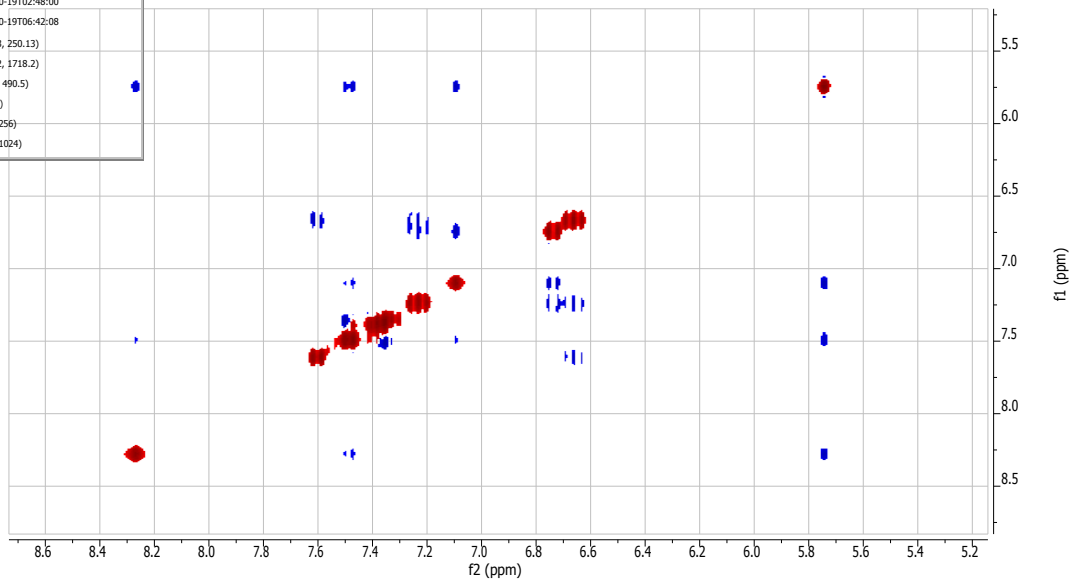



| Parameter                 | Value (f2, f1)          |
|---------------------------|-------------------------|
| 1 Title                   | 131018.205.15.ser       |
| 2 Comment                 | Oschatz SO-46 HSQC DMSO |
| 3 Origin                  | Bruker BioSpin GmbH     |
| 4 Spectrometer            | spect                   |
| 5 Solvent                 | DMSO                    |
| 6 Temperature             | 298.2                   |
| 7 Pulse Sequence          | hsqcetgps2              |
| 8 Experiment              | HSQC                    |
| 9 Number of Scans         | 8                       |
| 10 Receiver Gain          | 2050                    |
| 11 Relaxation Delay       | 1.3556                  |
| 12 Pulse Width            | 10.0000                 |
| 13 Acquisition Time       | 0.2980                  |
| 14 Acquisition Date       | 2013-10-19T06:44:00     |
| 15 Modification Date      | 2013-10-19T07:41:06     |
| 16 Spectrometer Frequency | (250.13, 62.90)         |
| 17 Spectral Width         | (1718.2, 10416.7)       |
| 18 Lowest Frequency       | (490.5, -493.0)         |
| 19 Nucleus                | (1H, 13C)               |
| 20 Acquired Size          | (512, 256)              |
| 21 Spectral Size          | (512, 512)              |

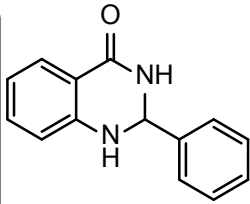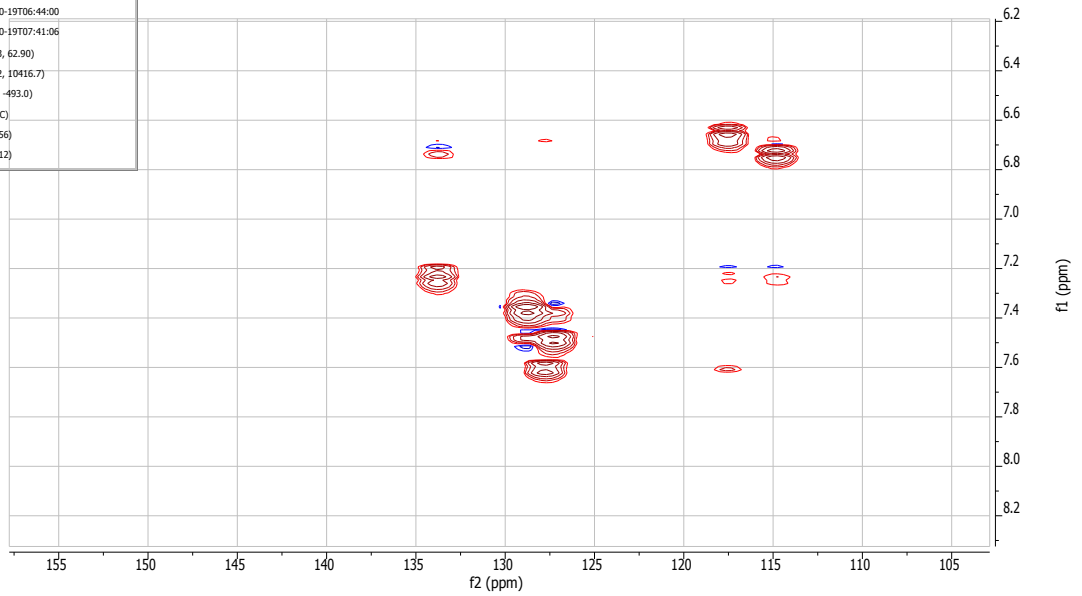

| Parameter                 | Value (f2, f1)          |
|---------------------------|-------------------------|
| 1 Title                   | 131018.205.16.ser       |
| 2 Comment                 | Oschatz SO-46 HMBC DMSO |
| 3 Origin                  | Bruker BioSpin GmbH     |
| 4 Spectrometer            | spect                   |
| 5 Solvent                 | DMSO                    |
| 6 Temperature             | 298.2                   |
| 7 Pulse Sequence          | hmbcrgnddf              |
| 8 Experiment              | HMBC                    |
| 9 Number of Scans         | 64                      |
| 10 Receiver Gain          | 2050                    |
| 11 Relaxation Delay       | 0.9225                  |
| 12 Pulse Width            | 10.0000                 |
| 13 Acquisition Time       | 1.1920                  |
| 14 Acquisition Date       | 2013-10-19T07:45:00     |
| 15 Modification Date      | 2013-10-19T12:41:40     |
| 16 Spectrometer Frequency | (250.13, 62.90)         |
| 17 Spectral Width         | (1718.2, 13966.5)       |
| 18 Lowest Frequency       | (490.5, -704.2)         |
| 19 Nucleus                | (1H, 13C)               |
| 20 Acquired Size          | (2048, 128)             |
| 21 Spectral Size          | (2048, 512)             |

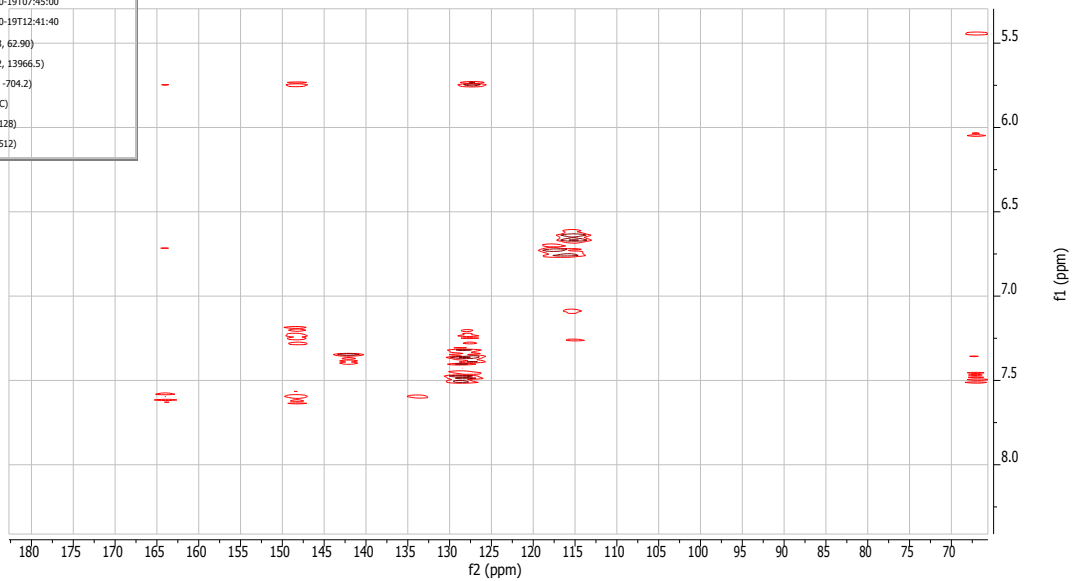

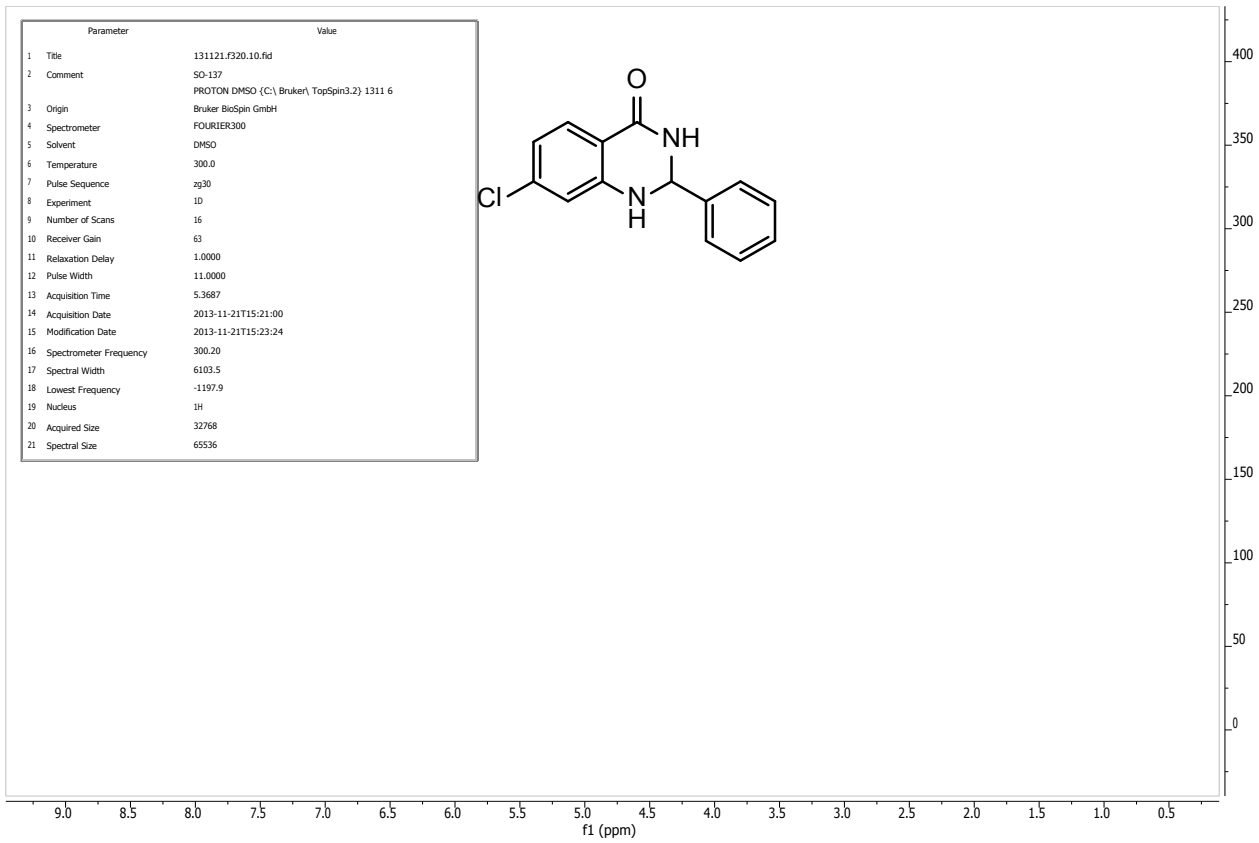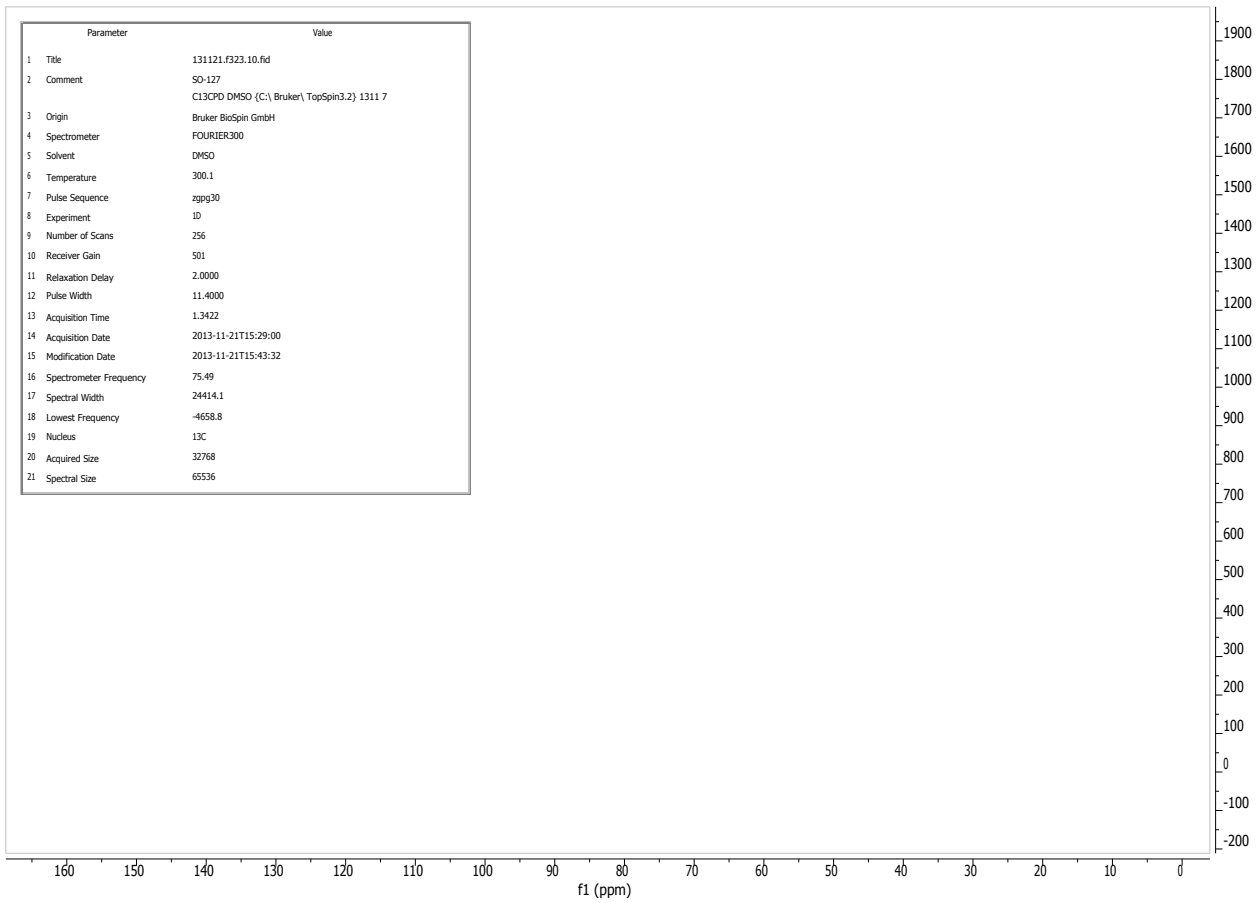

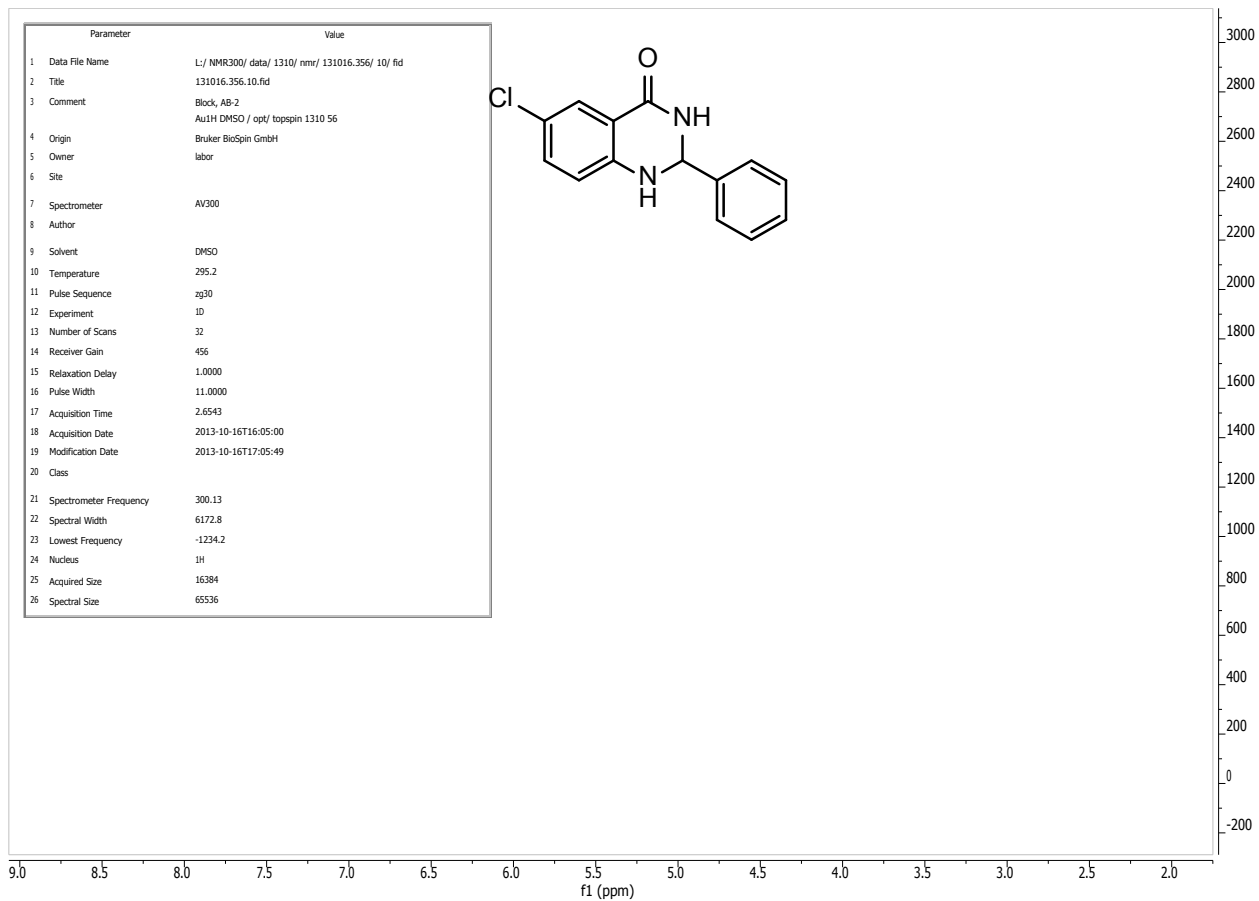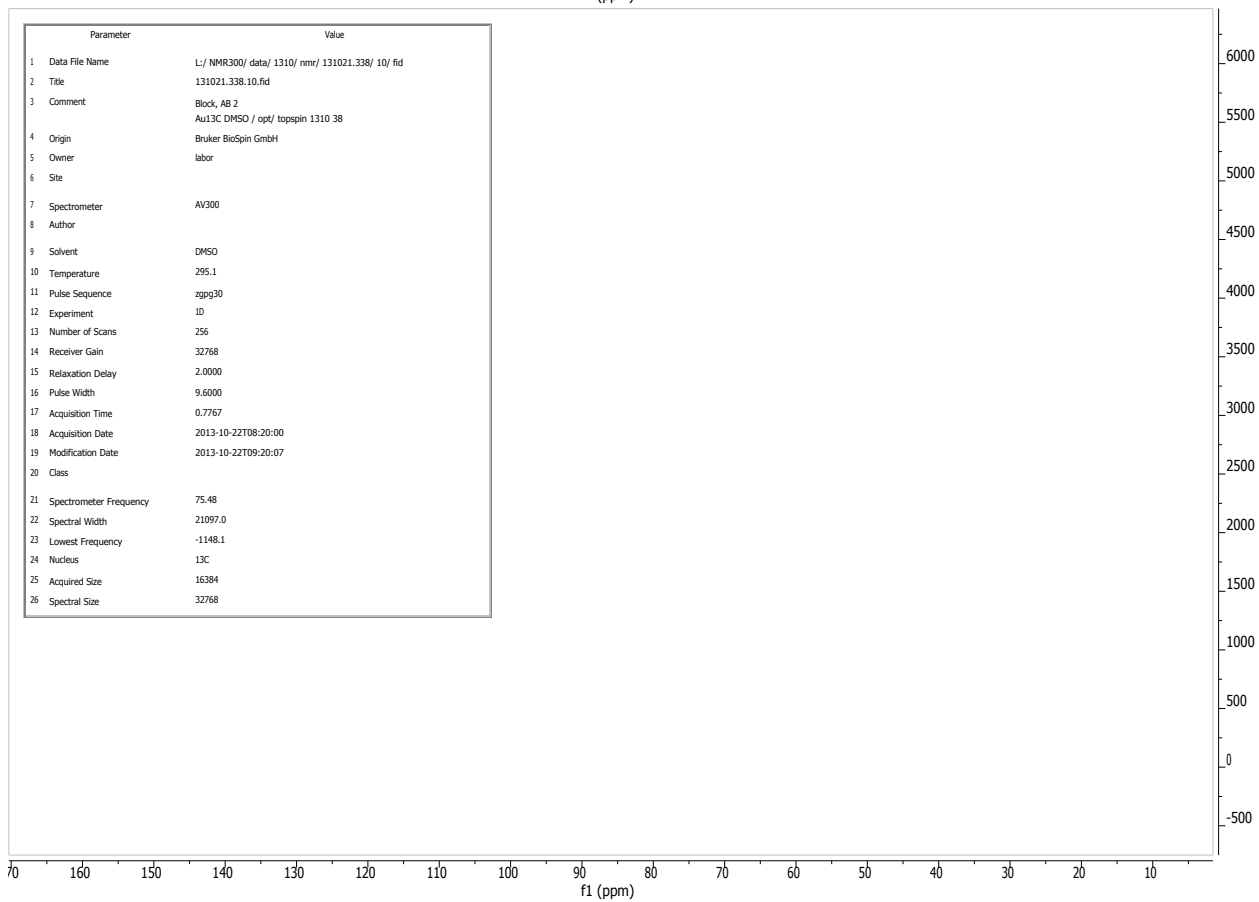

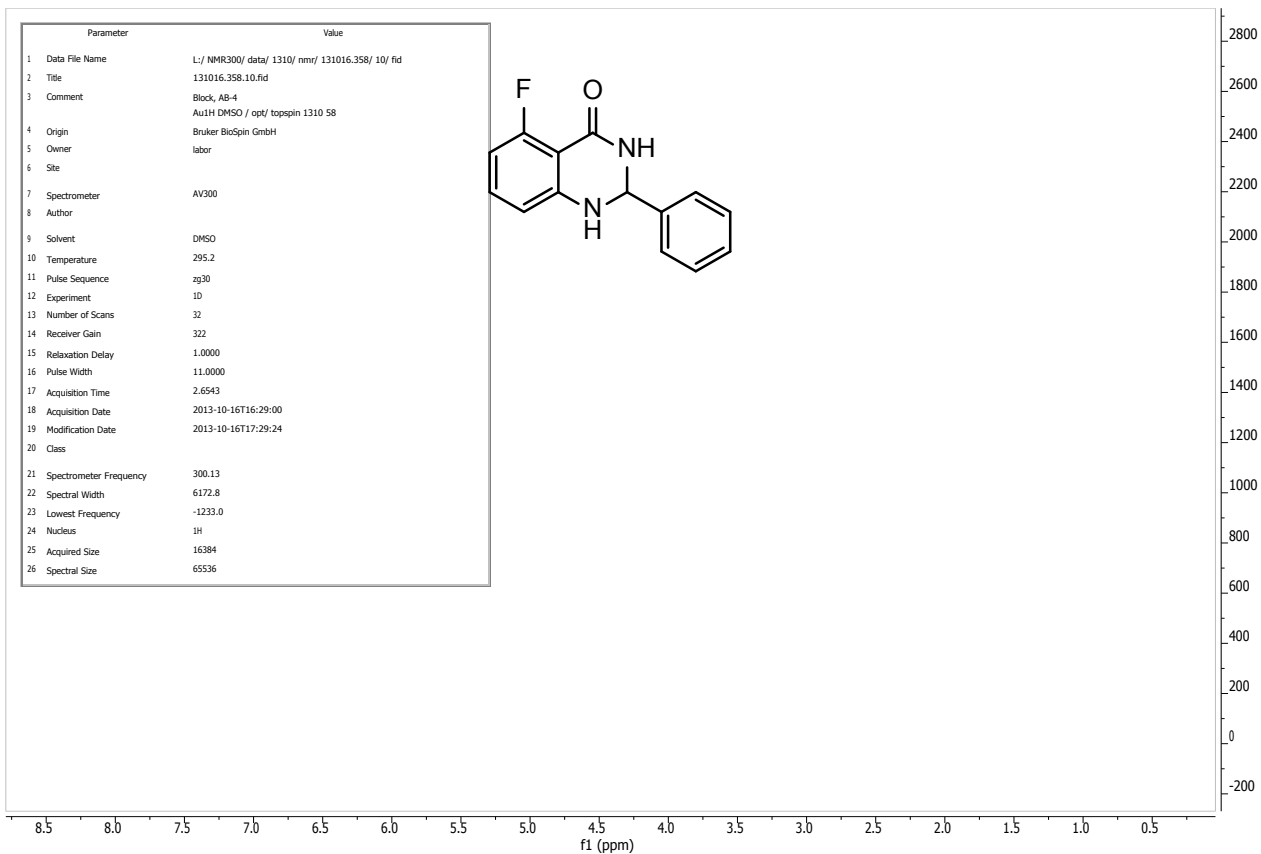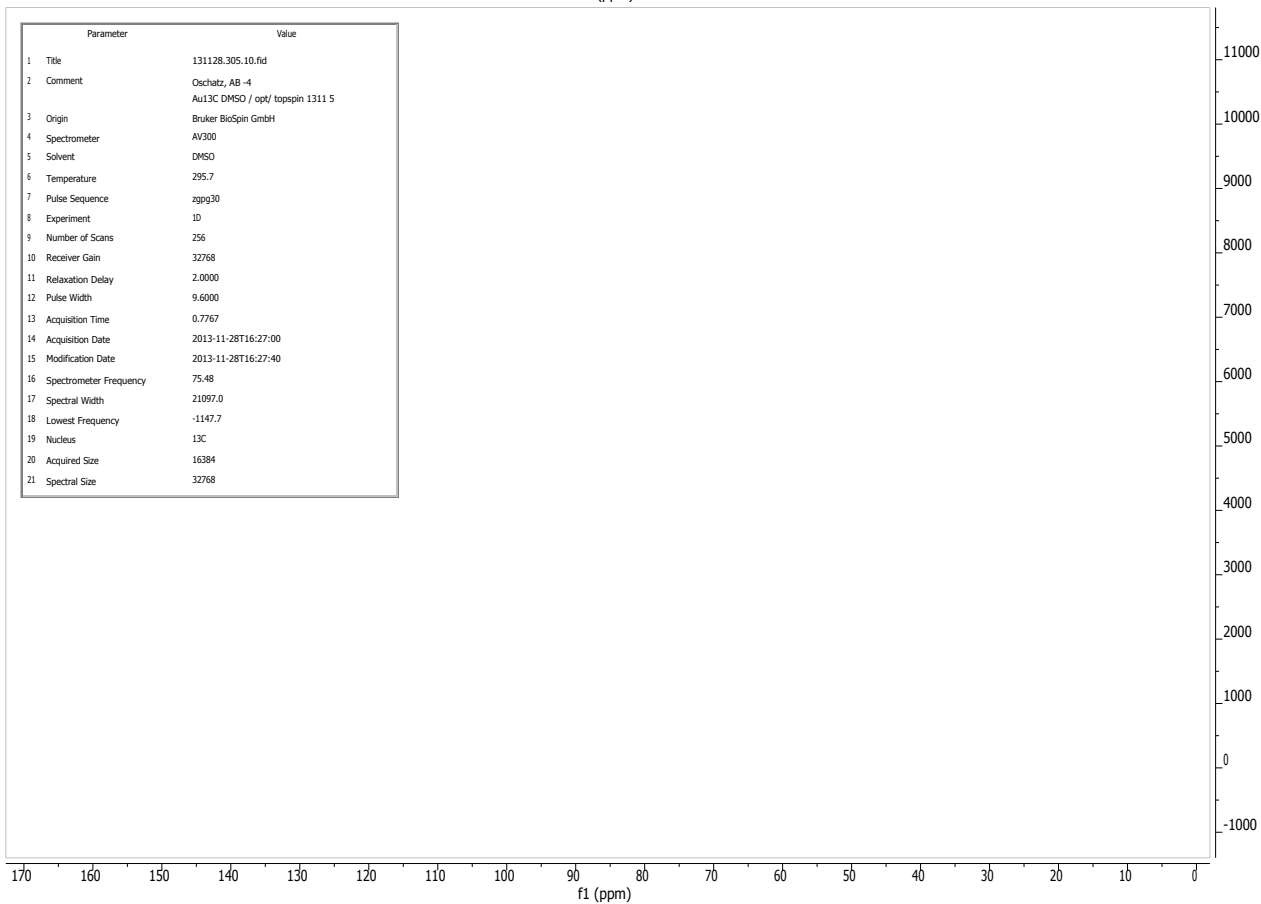

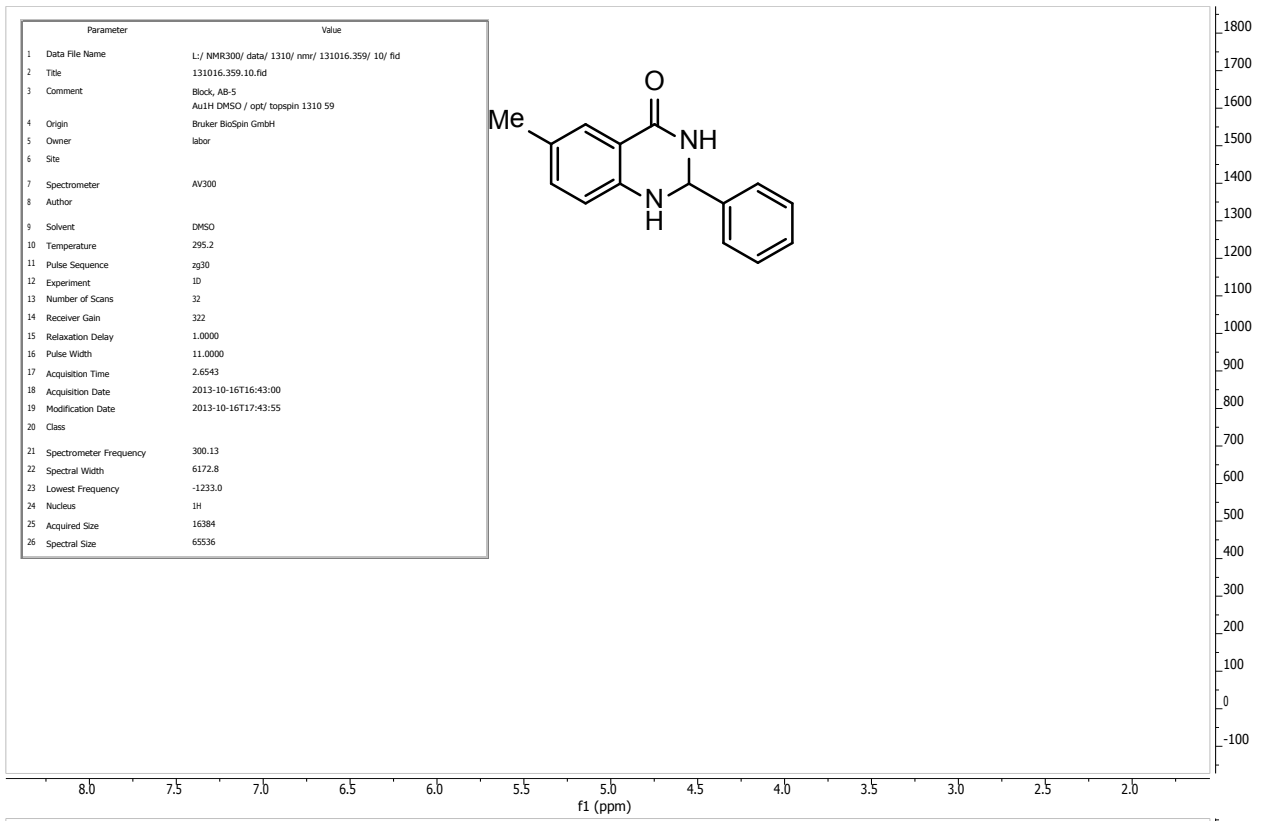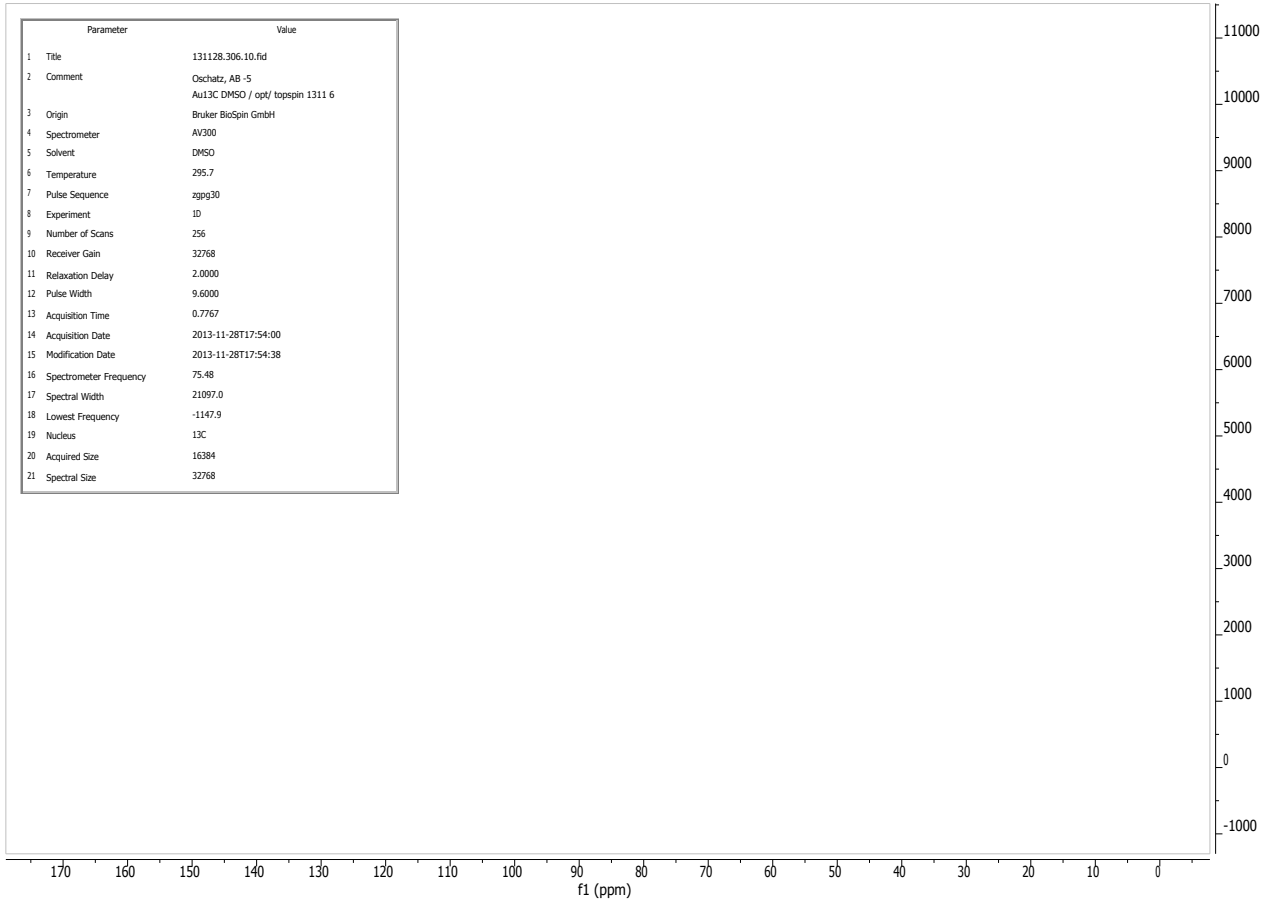

| Parameter                 | Value                                            |
|---------------------------|--------------------------------------------------|
| 1 Title                   | 131119.437.10.fid                                |
| 2 Comment                 | Oschatz_AB-8<br>Au1H DMSO / opt/ topspin 1311 37 |
| 3 Origin                  | Bruker BioSpin GmbH                              |
| 4 Spectrometer            | AV400                                            |
| 5 Solvent                 | DMSO                                             |
| 6 Temperature             | 297.0                                            |
| 7 Pulse Sequence          | zg30                                             |
| 8 Experiment              | 1D                                               |
| 9 Number of Scans         | 32                                               |
| 10 Receiver Gain          | 161                                              |
| 11 Relaxation Delay       | 1.5000                                           |
| 12 Pulse Width            | 12.2000                                          |
| 13 Acquisition Time       | 2.0448                                           |
| 14 Acquisition Date       | 2013-11-20T02:50:00                              |
| 15 Modification Date      | 2013-11-20T02:51:01                              |
| 16 Spectrometer Frequency | 400.13                                           |
| 17 Spectral Width         | 8012.8                                           |
| 18 Lowest Frequency       | -1606.4                                          |
| 19 Nucleus                | 1H                                               |
| 20 Acquired Size          | 16384                                            |
| 21 Spectral Size          | 65536                                            |

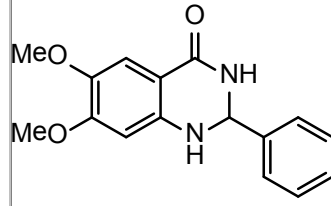

8.0 7.5 7.0 6.5 6.0 5.5 5.0 4.5 4.0 3.5 3.0 2.5 2.0 1.5 1.0 0.5 0.0  
f1 (ppm)

10000  
9000  
8000  
7000  
6000  
5000  
4000  
3000  
2000  
1000  
0

| Parameter                 | Value                                             |
|---------------------------|---------------------------------------------------|
| 1 Title                   | 131119.437.11.fid                                 |
| 2 Comment                 | Oschatz_AB-8<br>Au13C DMSO / opt/ topspin 1311 37 |
| 3 Origin                  | Bruker BioSpin GmbH                               |
| 4 Spectrometer            | AV400                                             |
| 5 Solvent                 | DMSO                                              |
| 6 Temperature             | 297.0                                             |
| 7 Pulse Sequence          | zgpg30                                            |
| 8 Experiment              | 1D                                                |
| 9 Number of Scans         | 256                                               |
| 10 Receiver Gain          | 4096                                              |
| 11 Relaxation Delay       | 1.7000                                            |
| 12 Pulse Width            | 10.0000                                           |
| 13 Acquisition Time       | 1.0945                                            |
| 14 Acquisition Date       | 2013-11-20T03:04:00                               |
| 15 Modification Date      | 2013-11-20T03:04:42                               |
| 16 Spectrometer Frequency | 100.63                                            |
| 17 Spectral Width         | 29940.1                                           |
| 18 Lowest Frequency       | -1720.4                                           |
| 19 Nucleus                | 13C                                               |
| 20 Acquired Size          | 32768                                             |
| 21 Spectral Size          | 65536                                             |

160 150 140 130 120 110 100 90 80 70 60 50 40 30 20 10 0  
f1 (ppm)

2100  
2000  
1900  
1800  
1700  
1600  
1500  
1400  
1300  
1200  
1100  
1000  
900  
800  
700  
600  
500  
400  
300  
200  
100  
0  
-100  
-200

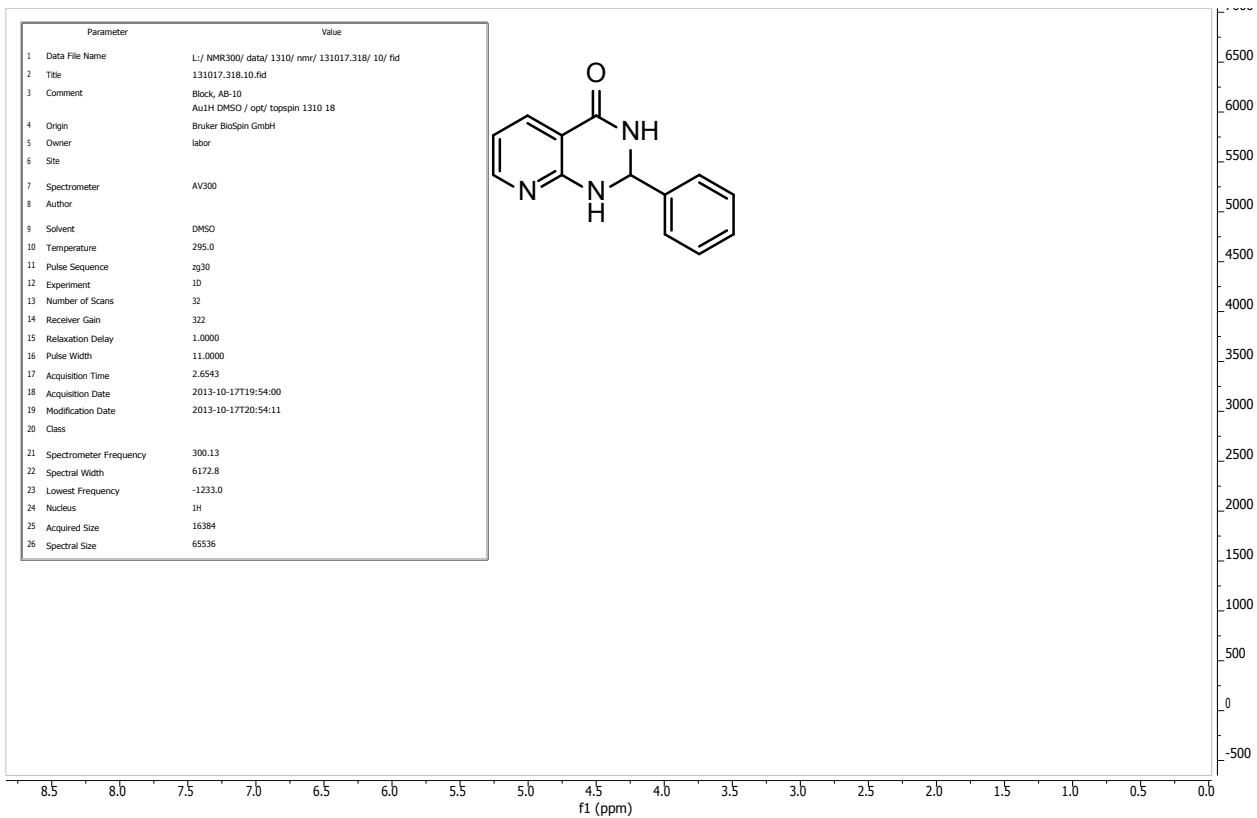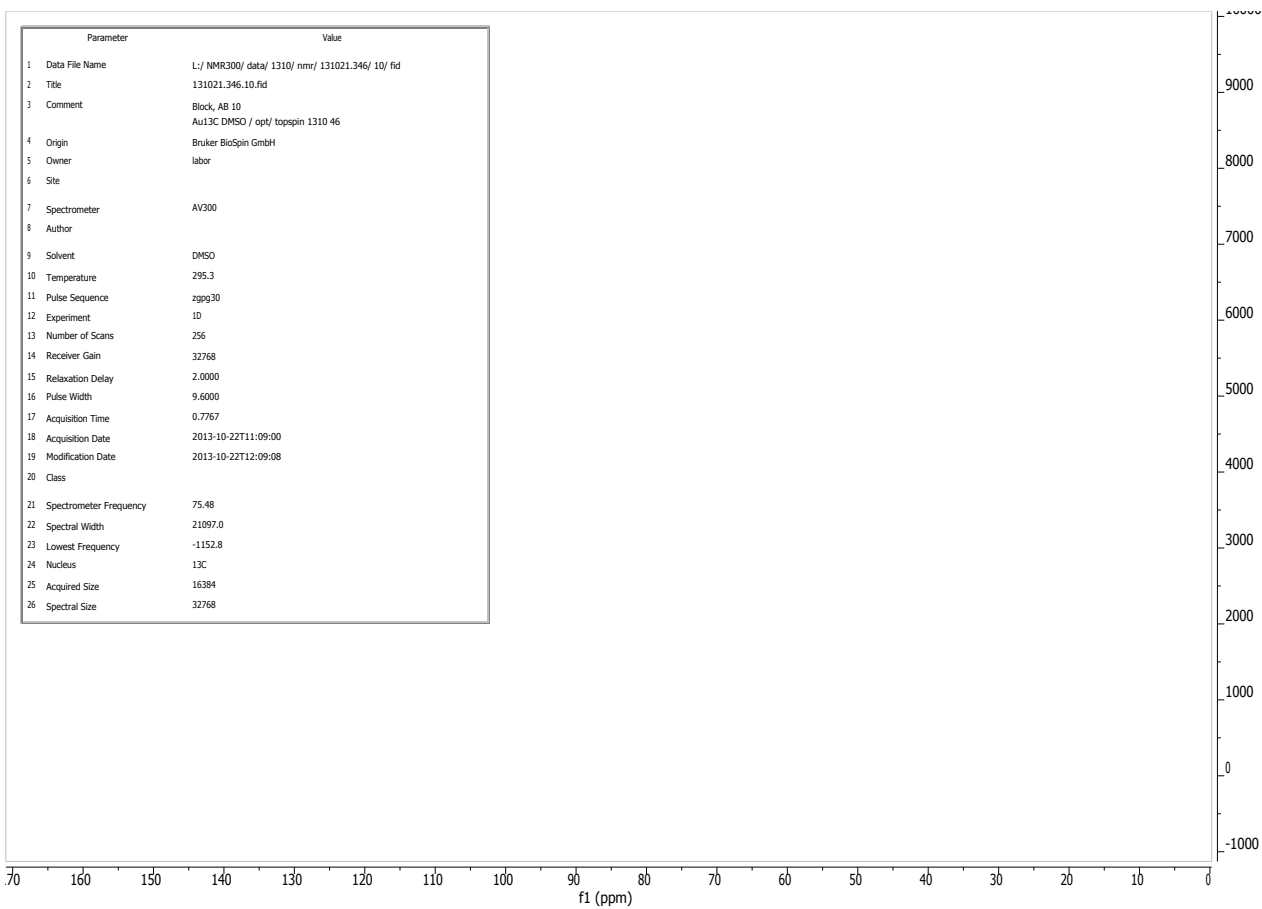

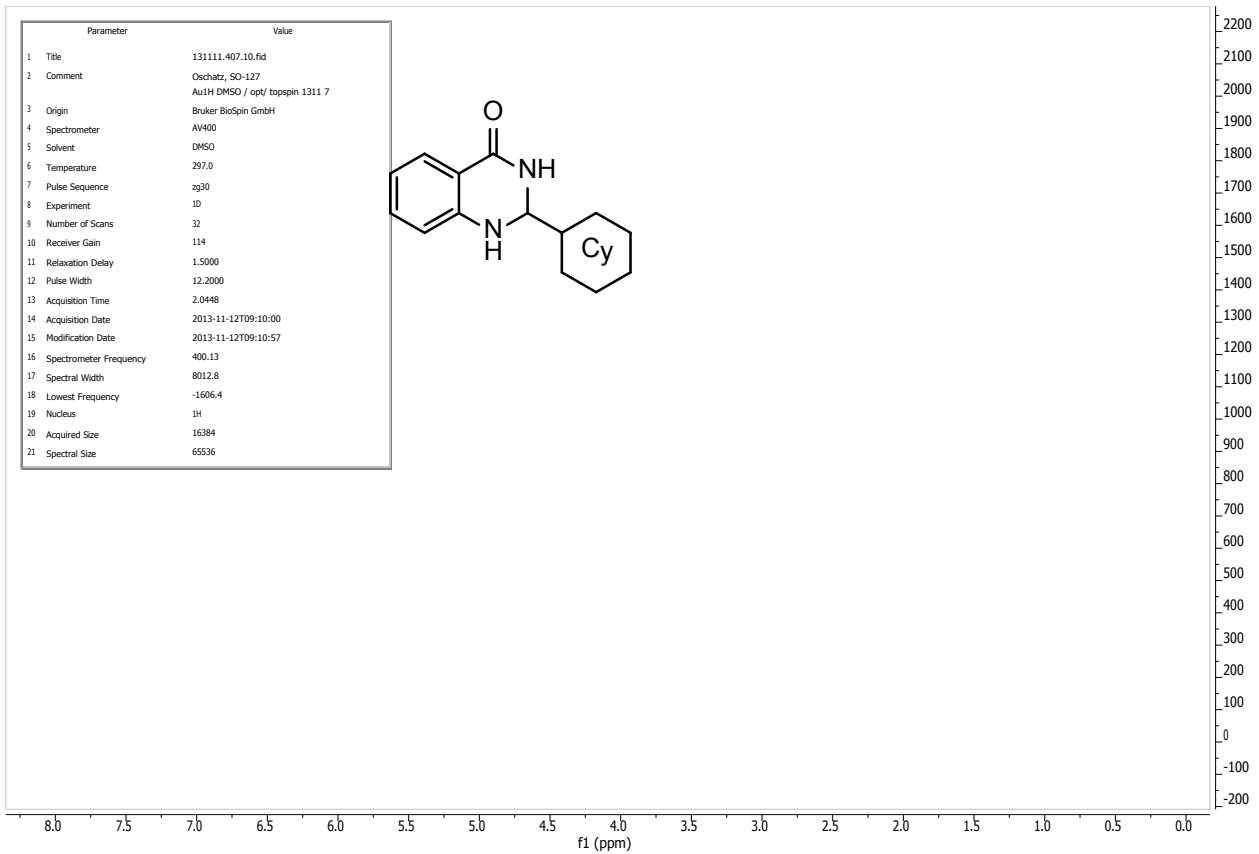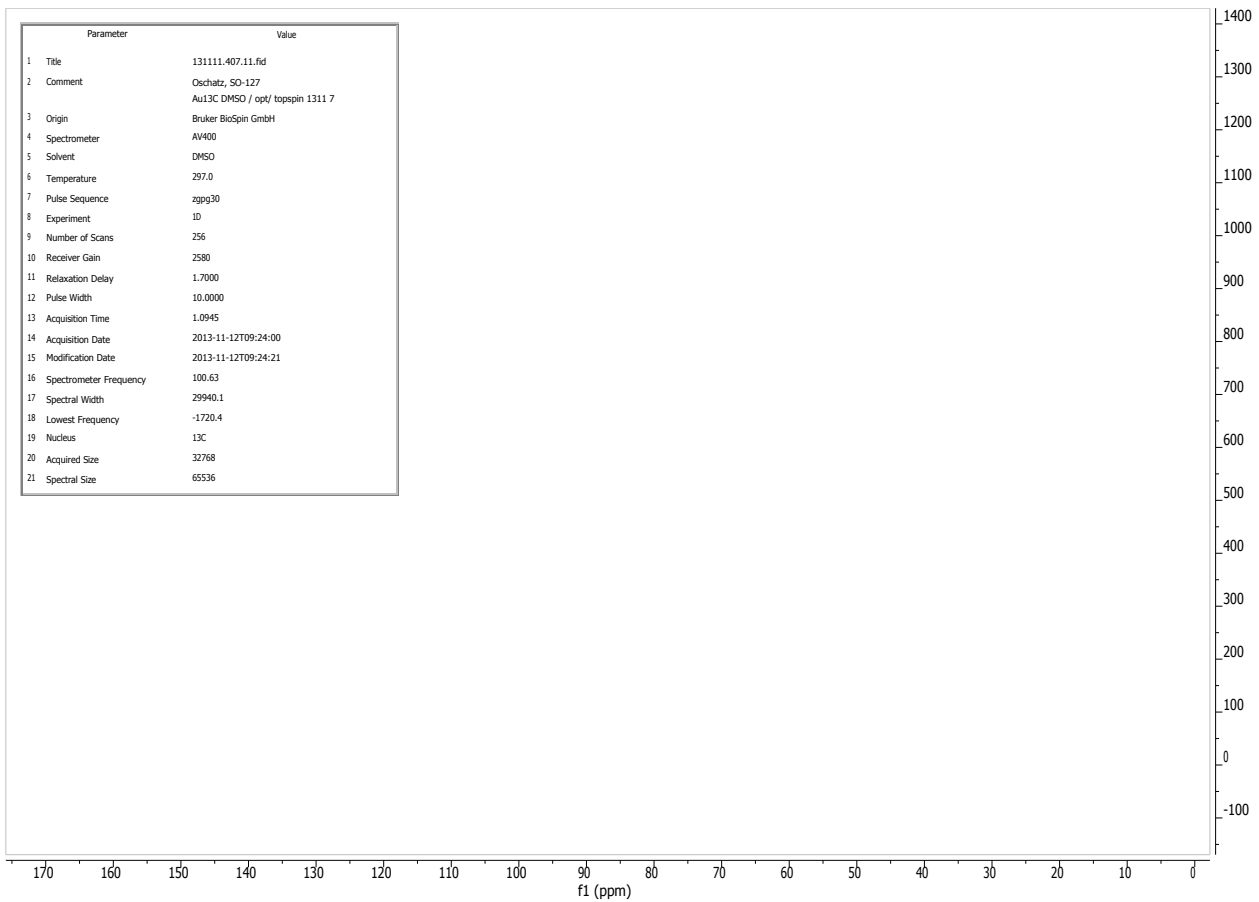



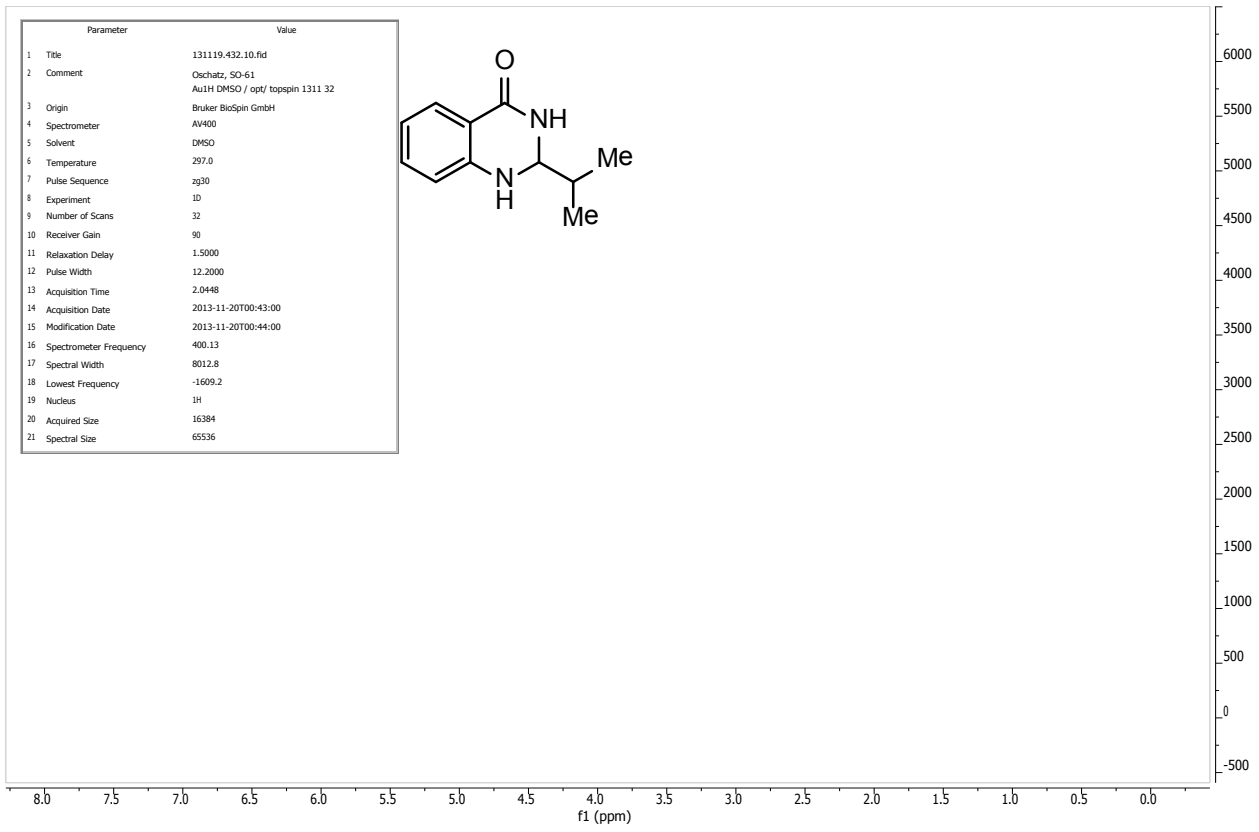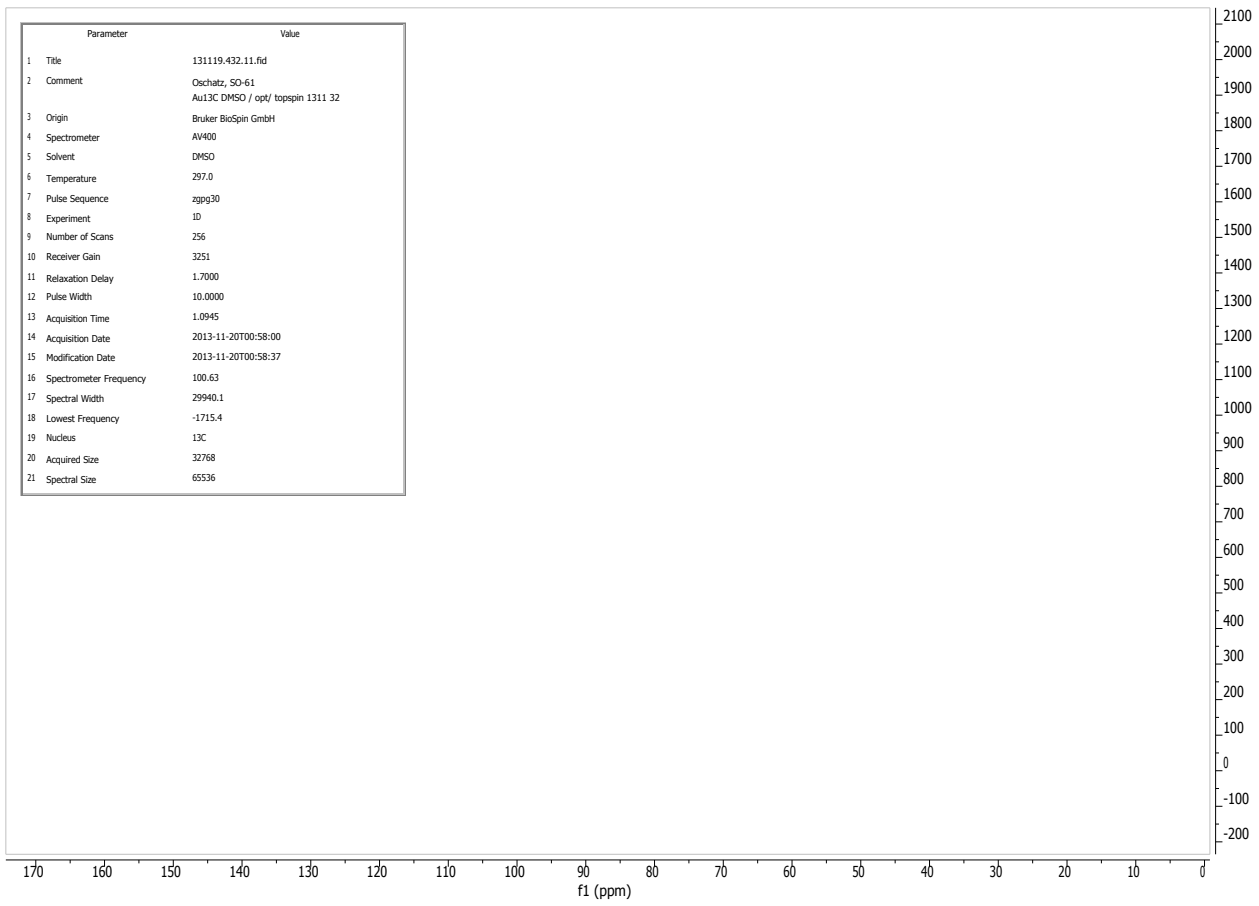

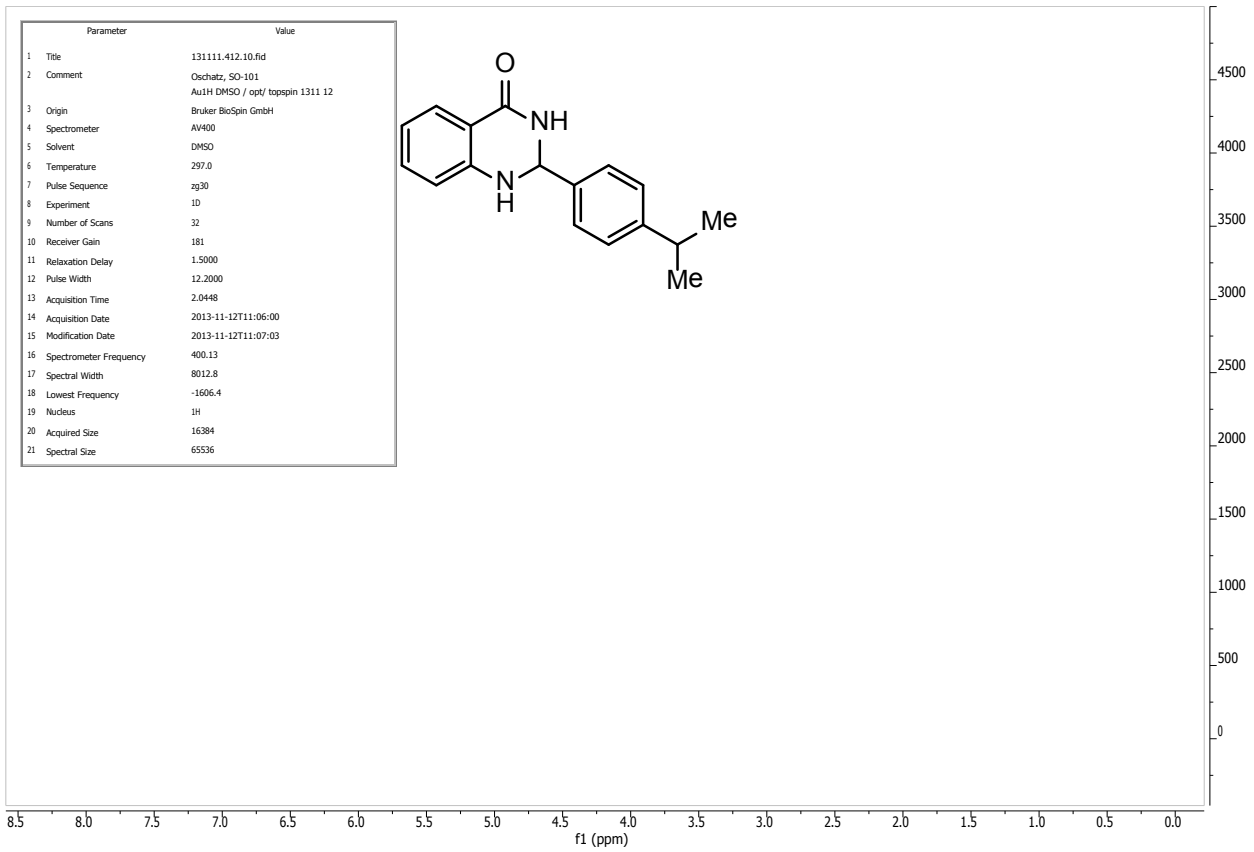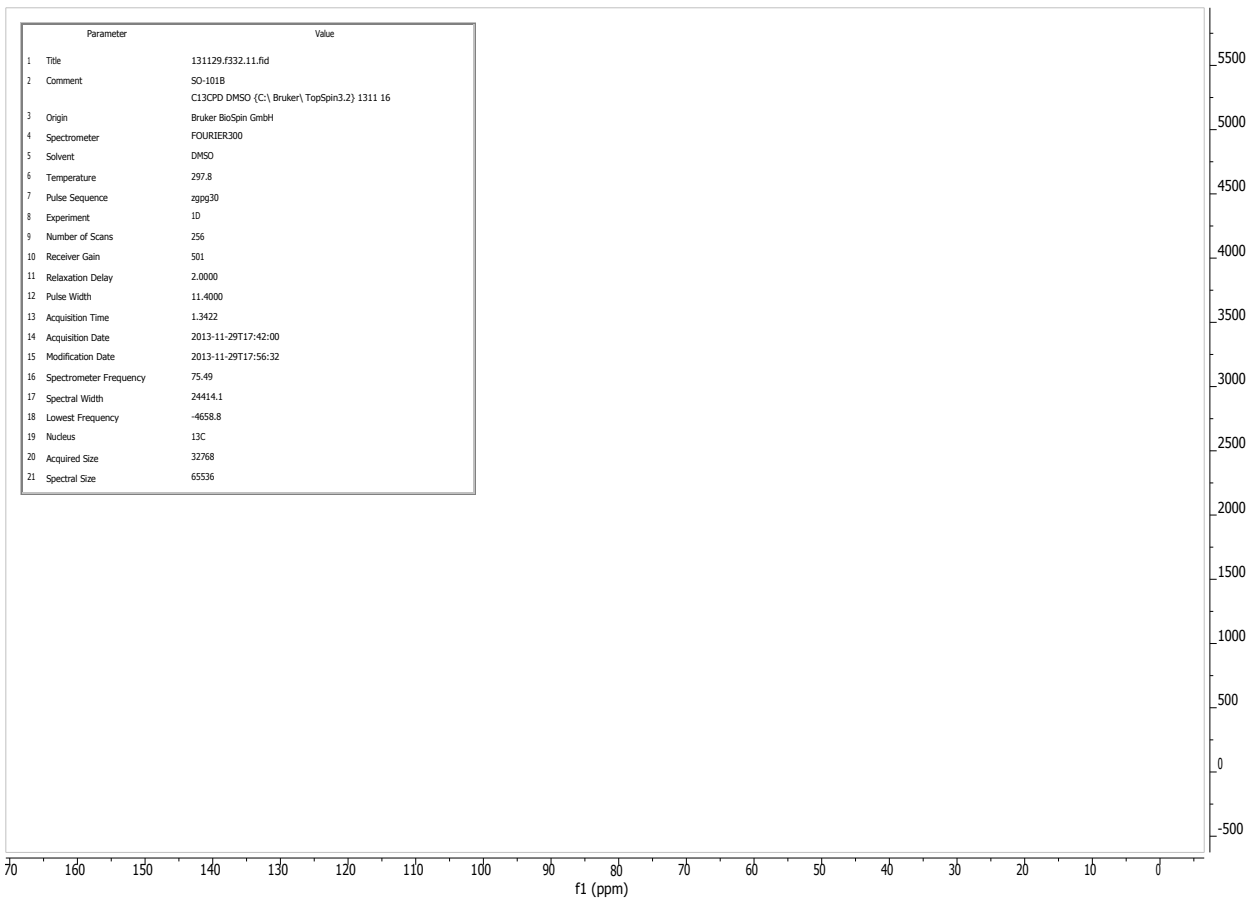

| Parameter                 | Value                                               |
|---------------------------|-----------------------------------------------------|
| 1 Title                   | 131029.334.10.fid                                   |
| 2 Comment                 | Oschatz/ SO-106<br>Au1H DMSO / opt/ topspin 1310 34 |
| 3 Origin                  | Bruker BioSpin GmbH                                 |
| 4 Spectrometer            | AV300                                               |
| 5 Solvent                 | DMSO                                                |
| 6 Temperature             | 295.1                                               |
| 7 Pulse Sequence          | zg30                                                |
| 8 Experiment              | 1D                                                  |
| 9 Number of Scans         | 32                                                  |
| 10 Receiver Gain          | 161                                                 |
| 11 Relaxation Delay       | 1.0000                                              |
| 12 Pulse Width            | 11.0000                                             |
| 13 Acquisition Time       | 2.6543                                              |
| 14 Acquisition Date       | 2013-10-30T07:20:00                                 |
| 15 Modification Date      | 2013-10-30T07:20:35                                 |
| 16 Spectrometer Frequency | 300.13                                              |
| 17 Spectral Width         | 6172.8                                              |
| 18 Lowest Frequency       | -1234.2                                             |
| 19 Nucleus                | 1H                                                  |
| 20 Acquired Size          | 16384                                               |
| 21 Spectral Size          | 65536                                               |

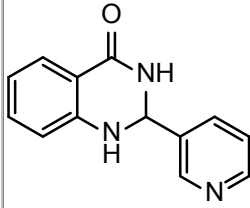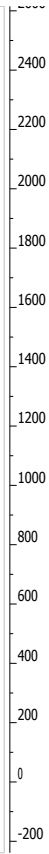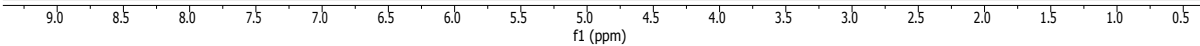

| Parameter                 | Value                                               |
|---------------------------|-----------------------------------------------------|
| 1 Title                   | 131030.406.10.fid                                   |
| 2 Comment                 | Oschatz/ SO-106<br>Au13C DMSO / opt/ topspin 1310 6 |
| 3 Origin                  | Bruker BioSpin GmbH                                 |
| 4 Spectrometer            | AV400                                               |
| 5 Solvent                 | DMSO                                                |
| 6 Temperature             | 297.0                                               |
| 7 Pulse Sequence          | zgpg30                                              |
| 8 Experiment              | 1D                                                  |
| 9 Number of Scans         | 256                                                 |
| 10 Receiver Gain          | 4096                                                |
| 11 Relaxation Delay       | 1.7000                                              |
| 12 Pulse Width            | 10.0000                                             |
| 13 Acquisition Time       | 1.0945                                              |
| 14 Acquisition Date       | 2013-10-30T20:23:00                                 |
| 15 Modification Date      | 2013-10-30T20:23:39                                 |
| 16 Spectrometer Frequency | 100.63                                              |
| 17 Spectral Width         | 29940.1                                             |
| 18 Lowest Frequency       | -1710.8                                             |
| 19 Nucleus                | 13C                                                 |
| 20 Acquired Size          | 32768                                               |
| 21 Spectral Size          | 65536                                               |

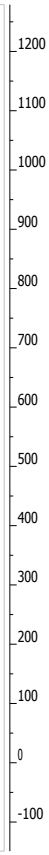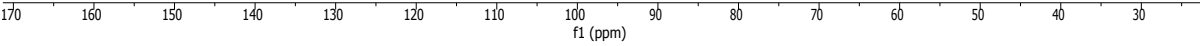

| Parameter                 | Value                                              |
|---------------------------|----------------------------------------------------|
| 1 Title                   | 131111.411.10.fid                                  |
| 2 Comment                 | Oschatz_SO-103<br>Au1H DMSO / opt/ topspin 1311 11 |
| 3 Origin                  | Bruker BioSpin GmbH                                |
| 4 Spectrometer            | AV400                                              |
| 5 Solvent                 | DMSO                                               |
| 6 Temperature             | 297.0                                              |
| 7 Pulse Sequence          | zg30                                               |
| 8 Experiment              | 1D                                                 |
| 9 Number of Scans         | 32                                                 |
| 10 Receiver Gain          | 181                                                |
| 11 Relaxation Delay       | 1.5000                                             |
| 12 Pulse Width            | 12.2000                                            |
| 13 Acquisition Time       | 2.0448                                             |
| 14 Acquisition Date       | 2013-11-12T10:41:00                                |
| 15 Modification Date      | 2013-11-12T10:41:44                                |
| 16 Spectrometer Frequency | 400.13                                             |
| 17 Spectral Width         | 8012.8                                             |
| 18 Lowest Frequency       | -1606.4                                            |
| 19 Nucleus                | 1H                                                 |
| 20 Acquired Size          | 16384                                              |
| 21 Spectral Size          | 65536                                              |

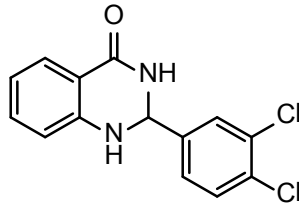

f1 (ppm)

| Parameter                 | Value                                               |
|---------------------------|-----------------------------------------------------|
| 1 Title                   | 131111.411.11.fid                                   |
| 2 Comment                 | Oschatz_SO-103<br>Au13C DMSO / opt/ topspin 1311 11 |
| 3 Origin                  | Bruker BioSpin GmbH                                 |
| 4 Spectrometer            | AV400                                               |
| 5 Solvent                 | DMSO                                                |
| 6 Temperature             | 297.0                                               |
| 7 Pulse Sequence          | zgpg30                                              |
| 8 Experiment              | 1D                                                  |
| 9 Number of Scans         | 256                                                 |
| 10 Receiver Gain          | 2896                                                |
| 11 Relaxation Delay       | 1.7000                                              |
| 12 Pulse Width            | 10.0000                                             |
| 13 Acquisition Time       | 1.0945                                              |
| 14 Acquisition Date       | 2013-11-12T10:55:00                                 |
| 15 Modification Date      | 2013-11-12T10:55:11                                 |
| 16 Spectrometer Frequency | 100.63                                              |
| 17 Spectral Width         | 29940.1                                             |
| 18 Lowest Frequency       | -1720.4                                             |
| 19 Nucleus                | 13C                                                 |
| 20 Acquired Size          | 32768                                               |
| 21 Spectral Size          | 65536                                               |

f1 (ppm)

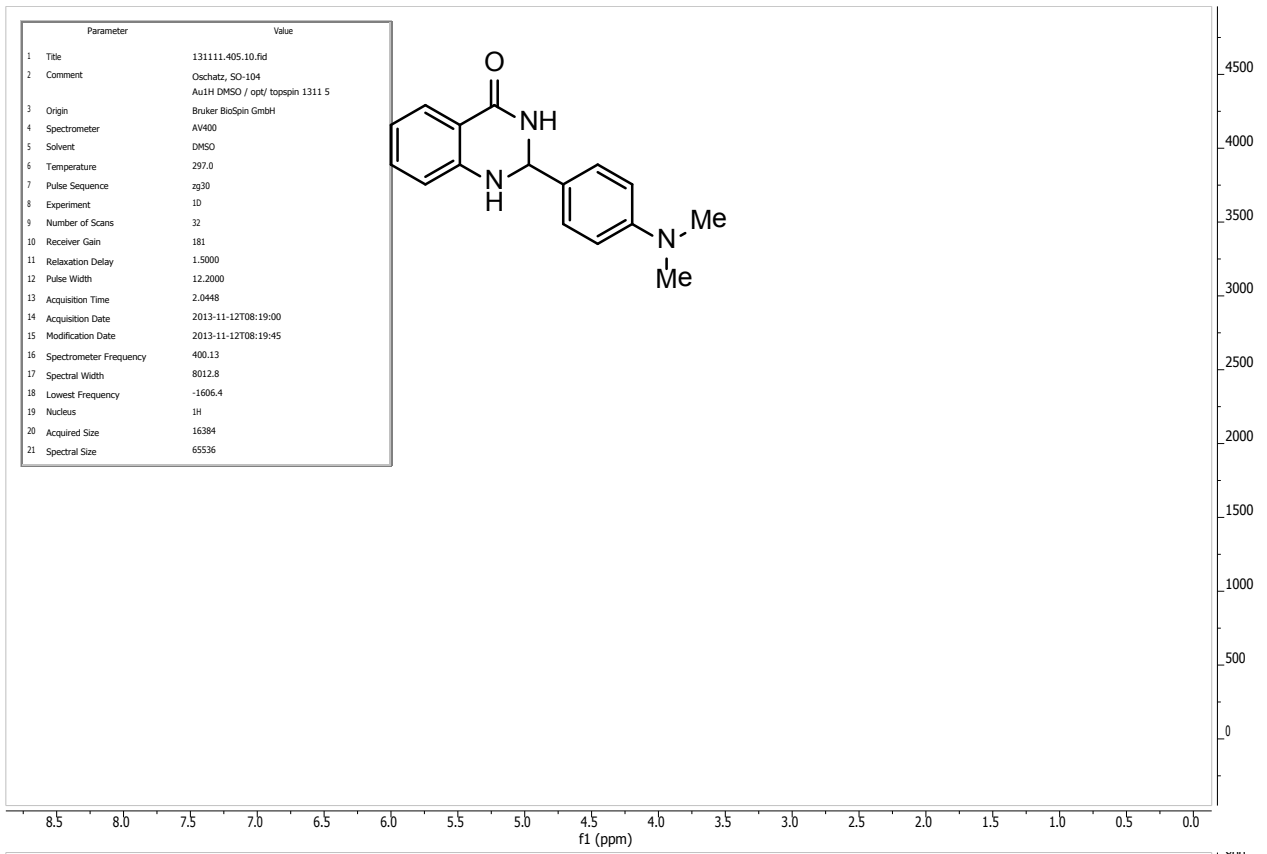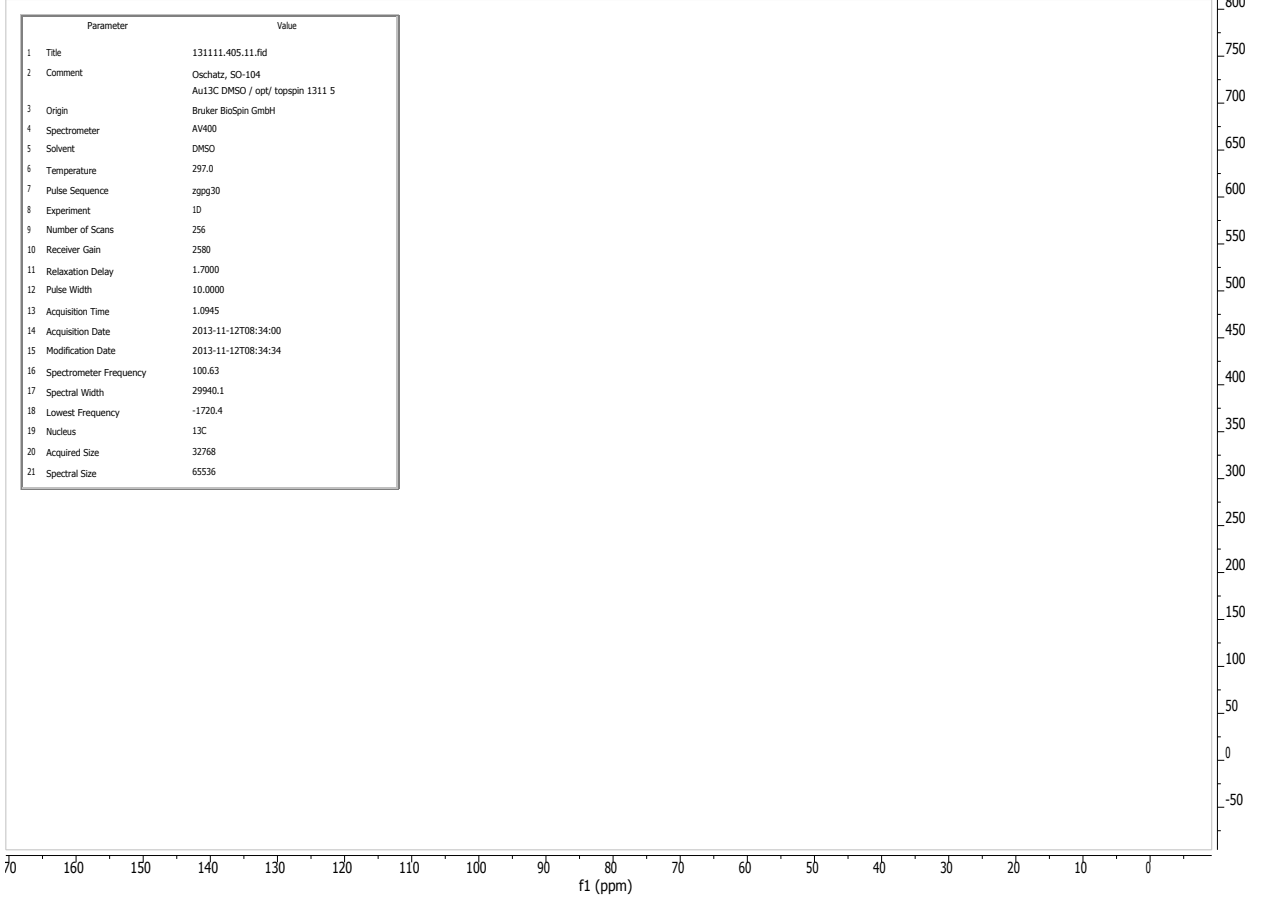

| Parameter                 | Value                                            |
|---------------------------|--------------------------------------------------|
| 1 Title                   | 131113.309.10.fid                                |
| 2 Comment                 | Oschatz_SO-45<br>Au1H DMSO / opt/ topspin 1311 9 |
| 3 Origin                  | Bruker BioSpin GmbH                              |
| 4 Spectrometer            | AV300                                            |
| 5 Solvent                 | DMSO                                             |
| 6 Temperature             | 295.1                                            |
| 7 Pulse Sequence          | zg30                                             |
| 8 Experiment              | 1D                                               |
| 9 Number of Scans         | 32                                               |
| 10 Receiver Gain          | 128                                              |
| 11 Relaxation Delay       | 1.0000                                           |
| 12 Pulse Width            | 11.0000                                          |
| 13 Acquisition Time       | 2.6543                                           |
| 14 Acquisition Date       | 2013-11-14T08:00:00                              |
| 15 Modification Date      | 2013-11-14T08:00:05                              |
| 16 Spectrometer Frequency | 300.13                                           |
| 17 Spectral Width         | 6172.8                                           |
| 18 Lowest Frequency       | -1234.2                                          |
| 19 Nucleus                | 1H                                               |
| 20 Acquired Size          | 16384                                            |
| 21 Spectral Size          | 65536                                            |

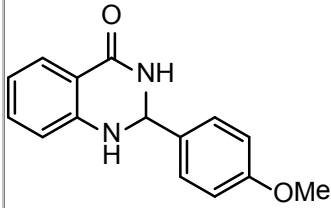

11000  
10000  
9000  
8000  
7000  
6000  
5000  
4000  
3000  
2000  
1000  
0  
-1000

f1 (ppm)

| Parameter                 | Value                                              |
|---------------------------|----------------------------------------------------|
| 1 Title                   | 131111.406.10.fid                                  |
| 2 Comment                 | Oschatz_SO-115<br>Au13C DMSO / opt/ topspin 1311 6 |
| 3 Origin                  | Bruker BioSpin GmbH                                |
| 4 Spectrometer            | AV400                                              |
| 5 Solvent                 | DMSO                                               |
| 6 Temperature             | 297.0                                              |
| 7 Pulse Sequence          | zgpg30                                             |
| 8 Experiment              | 1D                                                 |
| 9 Number of Scans         | 256                                                |
| 10 Receiver Gain          | 4598                                               |
| 11 Relaxation Delay       | 1.7000                                             |
| 12 Pulse Width            | 10.0000                                            |
| 13 Acquisition Time       | 1.0945                                             |
| 14 Acquisition Date       | 2013-11-12T08:58:00                                |
| 15 Modification Date      | 2013-11-12T08:58:32                                |
| 16 Spectrometer Frequency | 100.63                                             |
| 17 Spectral Width         | 29940.1                                            |
| 18 Lowest Frequency       | -1715.2                                            |
| 19 Nucleus                | 13C                                                |
| 20 Acquired Size          | 32768                                              |
| 21 Spectral Size          | 65536                                              |

2800  
2600  
2400  
2200  
2000  
1800  
1600  
1400  
1200  
1000  
800  
600  
400  
200  
0  
-200

f1 (ppm)

170 160 150 140 130 120 110 100 90 80 70 60 50 40 30 20 10 0

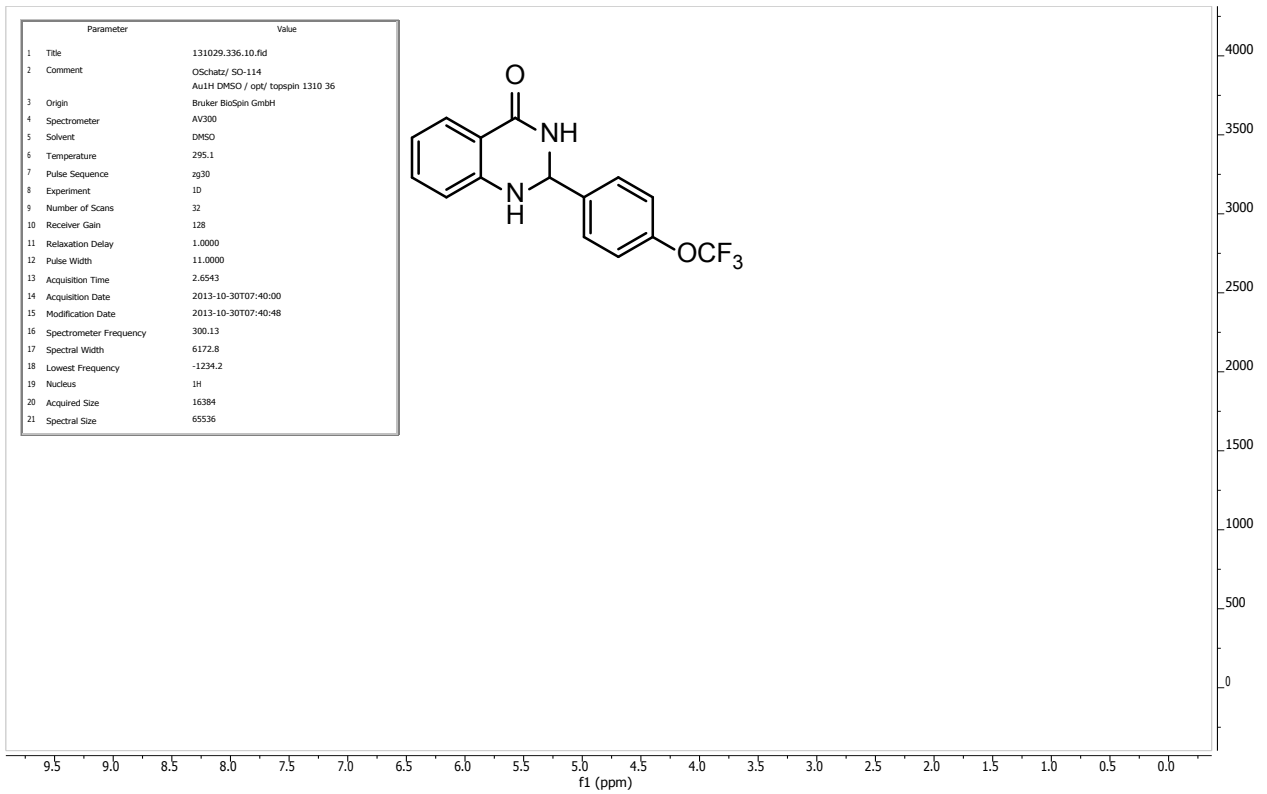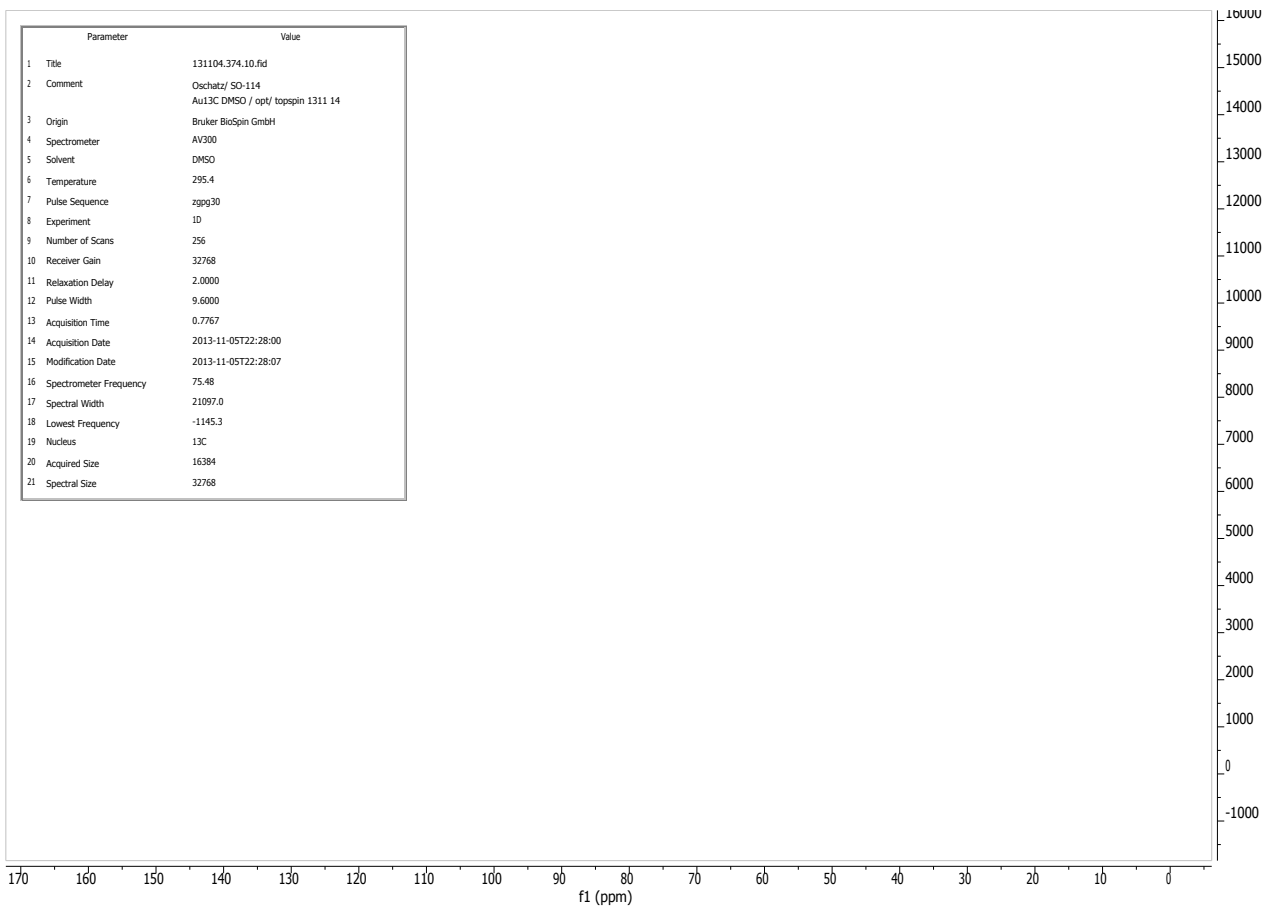

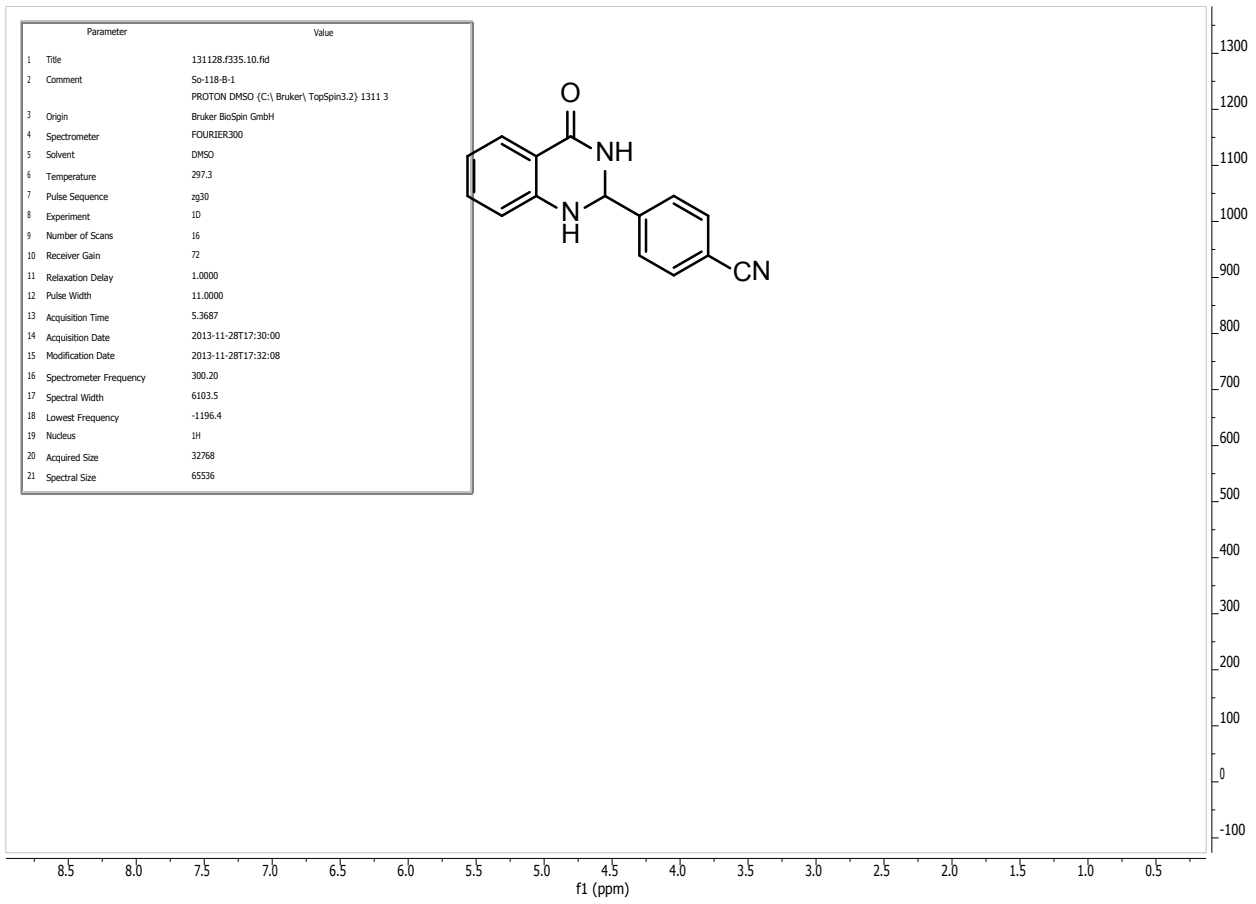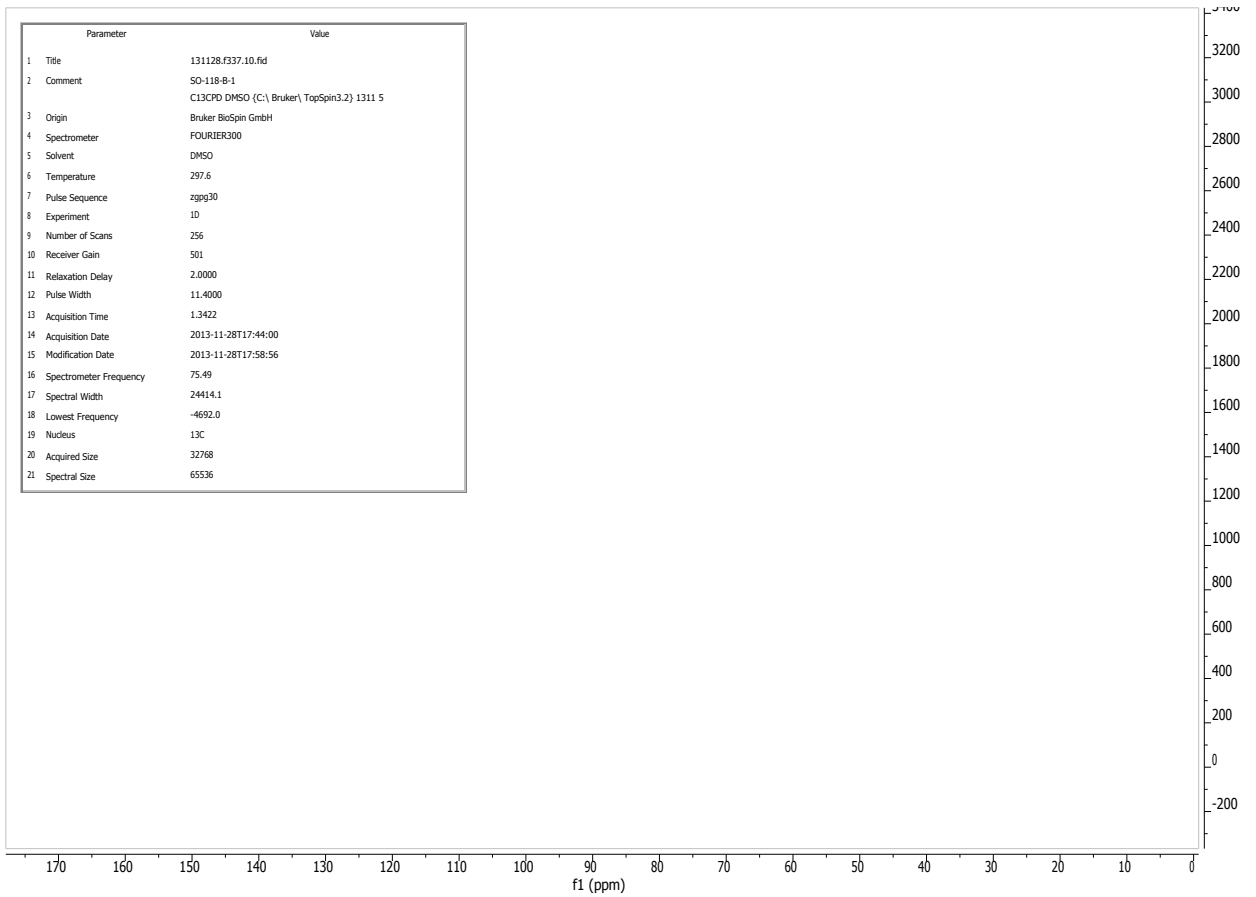



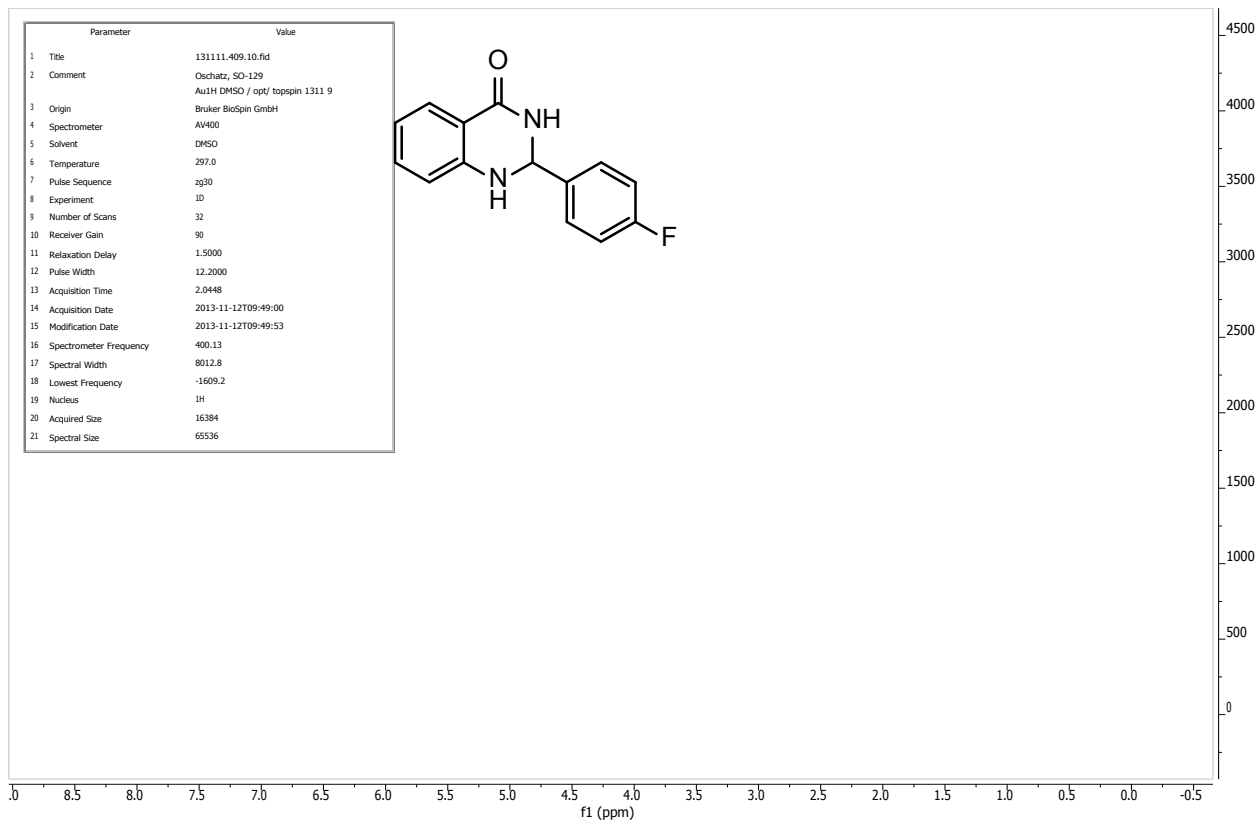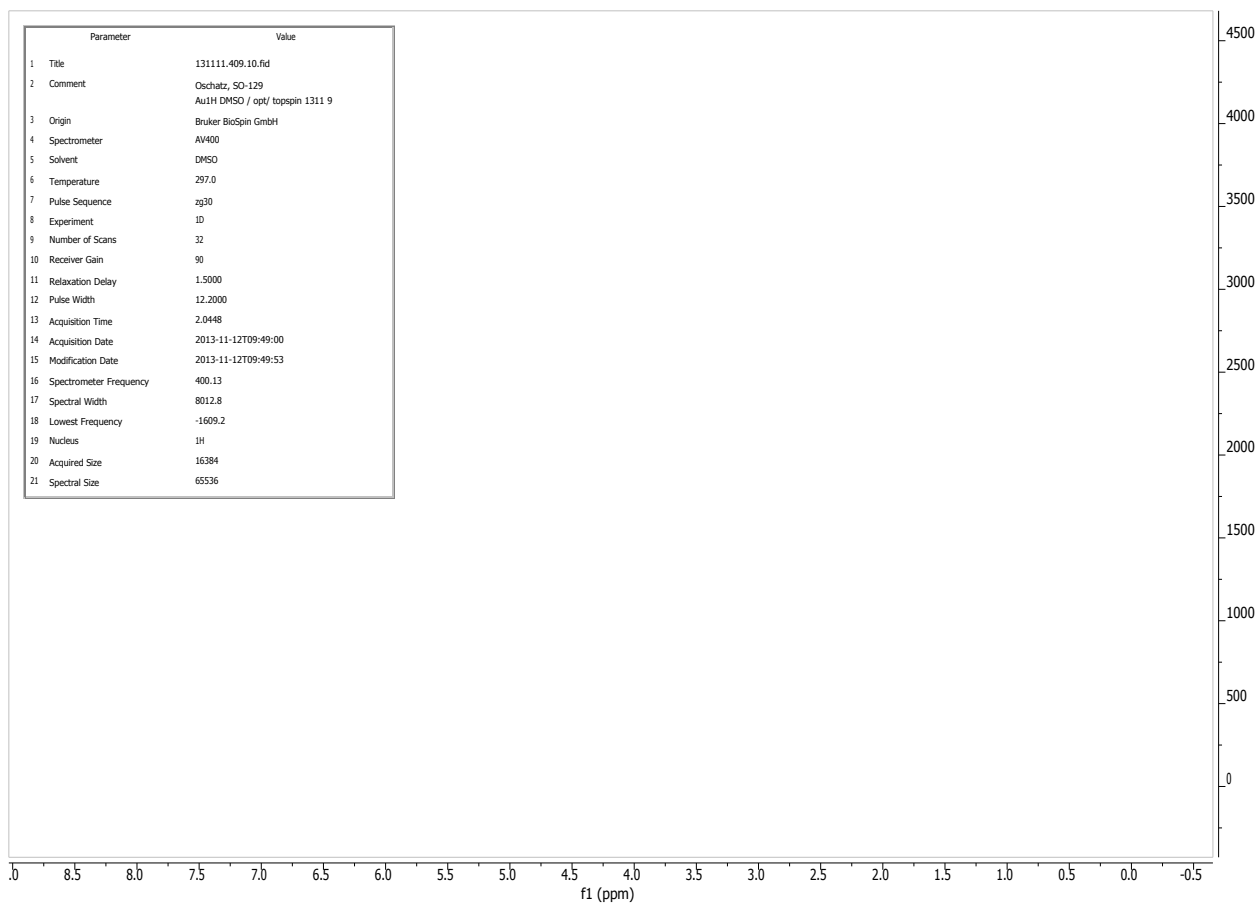

| Parameter                 | Value                                                 |
|---------------------------|-------------------------------------------------------|
| 1 Title                   | 131106.437.10.fid                                     |
| 2 Comment                 | Oschaltz/ SO- 120<br>Au1H DMSO / opt/ toppsin 1311 37 |
| 3 Origin                  | Bruker BioSpin GmbH                                   |
| 4 Spectrometer            | AV400                                                 |
| 5 Solvent                 | DMSO                                                  |
| 6 Temperature             | 297.0                                                 |
| 7 Pulse Sequence          | zg30                                                  |
| 8 Experiment              | 1D                                                    |
| 9 Number of Scans         | 32                                                    |
| 10 Receiver Gain          | 228                                                   |
| 11 Relaxation Delay       | 1.5000                                                |
| 12 Pulse Width            | 12.2000                                               |
| 13 Acquisition Time       | 2.0448                                                |
| 14 Acquisition Date       | 2013-11-07T13:47:00                                   |
| 15 Modification Date      | 2013-11-07T13:47:10                                   |
| 16 Spectrometer Frequency | 400.13                                                |
| 17 Spectral Width         | 8012.8                                                |
| 18 Lowest Frequency       | -1609.2                                               |
| 19 Nucleus                | 1H                                                    |
| 20 Acquired Size          | 16384                                                 |
| 21 Spectral Size          | 65536                                                 |

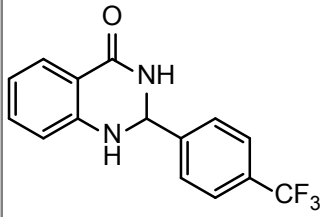

9.0 8.5 8.0 7.5 7.0 6.5 6.0 5.5 5.0 4.5 4.0 3.5 3.0 2.5 2.0 1.5 1.0 0.5 0.0  
f1 (ppm)

3400  
3200  
3000  
2800  
2600  
2400  
2200  
2000  
1800  
1600  
1400  
1200  
1000  
800  
600  
400  
200  
0  
-200

| Parameter                 | Value                                                  |
|---------------------------|--------------------------------------------------------|
| 1 Title                   | 131106.437.11.fid                                      |
| 2 Comment                 | Oschaltz/ SO- 120<br>Au13C DMSO / opt/ toppsin 1311 37 |
| 3 Origin                  | Bruker BioSpin GmbH                                    |
| 4 Spectrometer            | AV400                                                  |
| 5 Solvent                 | DMSO                                                   |
| 6 Temperature             | 297.0                                                  |
| 7 Pulse Sequence          | zgpg30                                                 |
| 8 Experiment              | 1D                                                     |
| 9 Number of Scans         | 500                                                    |
| 10 Receiver Gain          | 4096                                                   |
| 11 Relaxation Delay       | 1.7000                                                 |
| 12 Pulse Width            | 10.0000                                                |
| 13 Acquisition Time       | 1.0945                                                 |
| 14 Acquisition Date       | 2013-11-07T14:12:00                                    |
| 15 Modification Date      | 2013-11-07T14:12:15                                    |
| 16 Spectrometer Frequency | 100.63                                                 |
| 17 Spectral Width         | 29940.1                                                |
| 18 Lowest Frequency       | -1715.7                                                |
| 19 Nucleus                | 13C                                                    |
| 20 Acquired Size          | 32768                                                  |
| 21 Spectral Size          | 65536                                                  |

160 150 140 130 120 110 100 90 80 70 60 50 40 30 20 10  
f1 (ppm)

1700  
1600  
1500  
1400  
1300  
1200  
1100  
1000  
900  
800  
700  
600  
500  
400  
300  
200  
100  
0  
-100

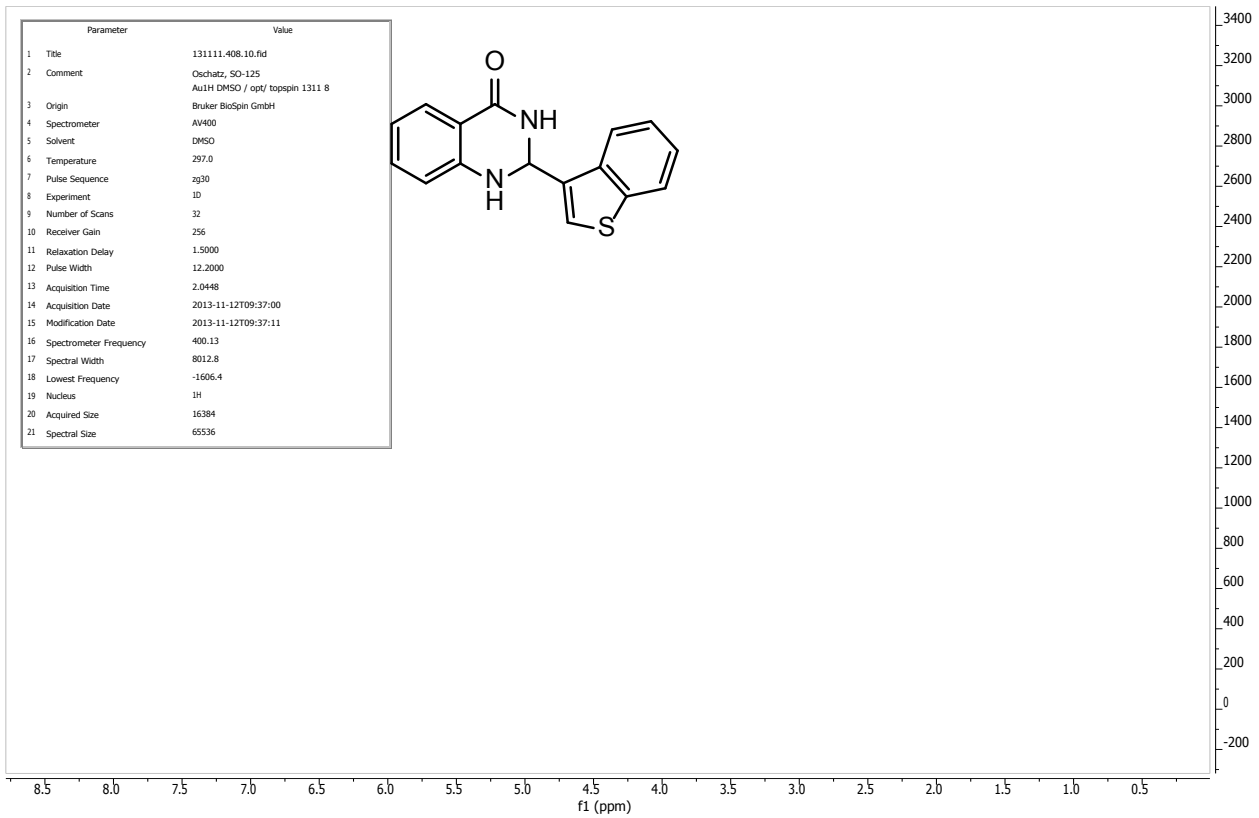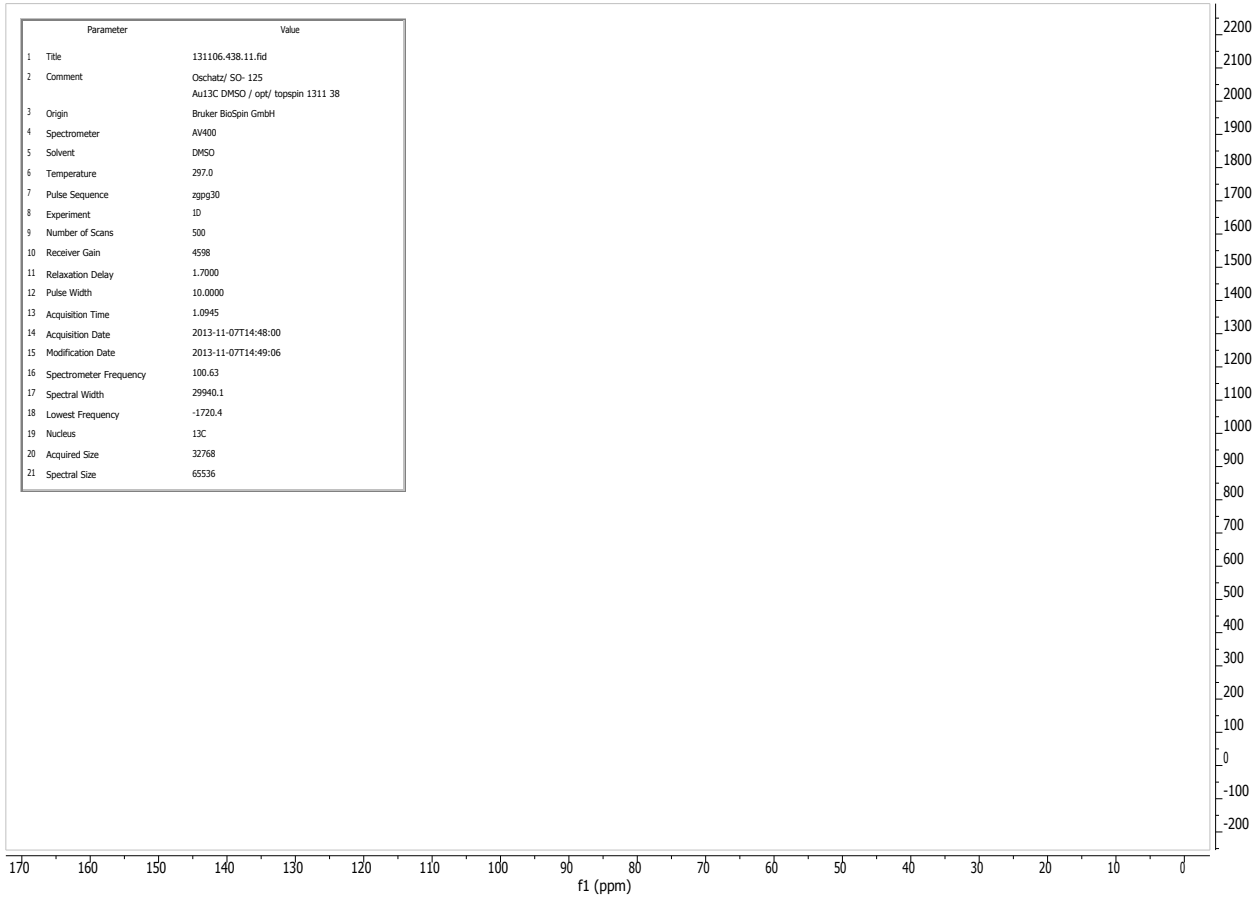

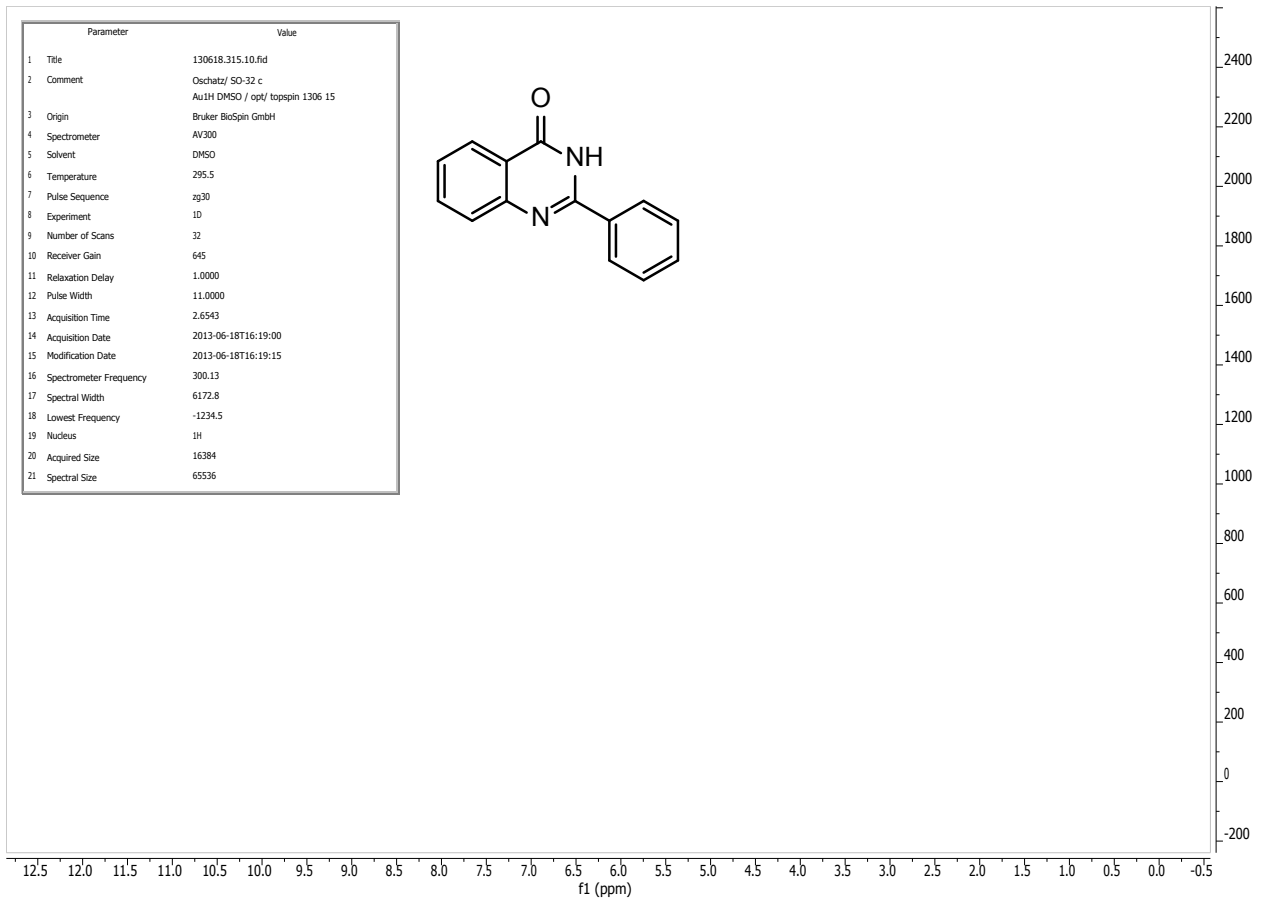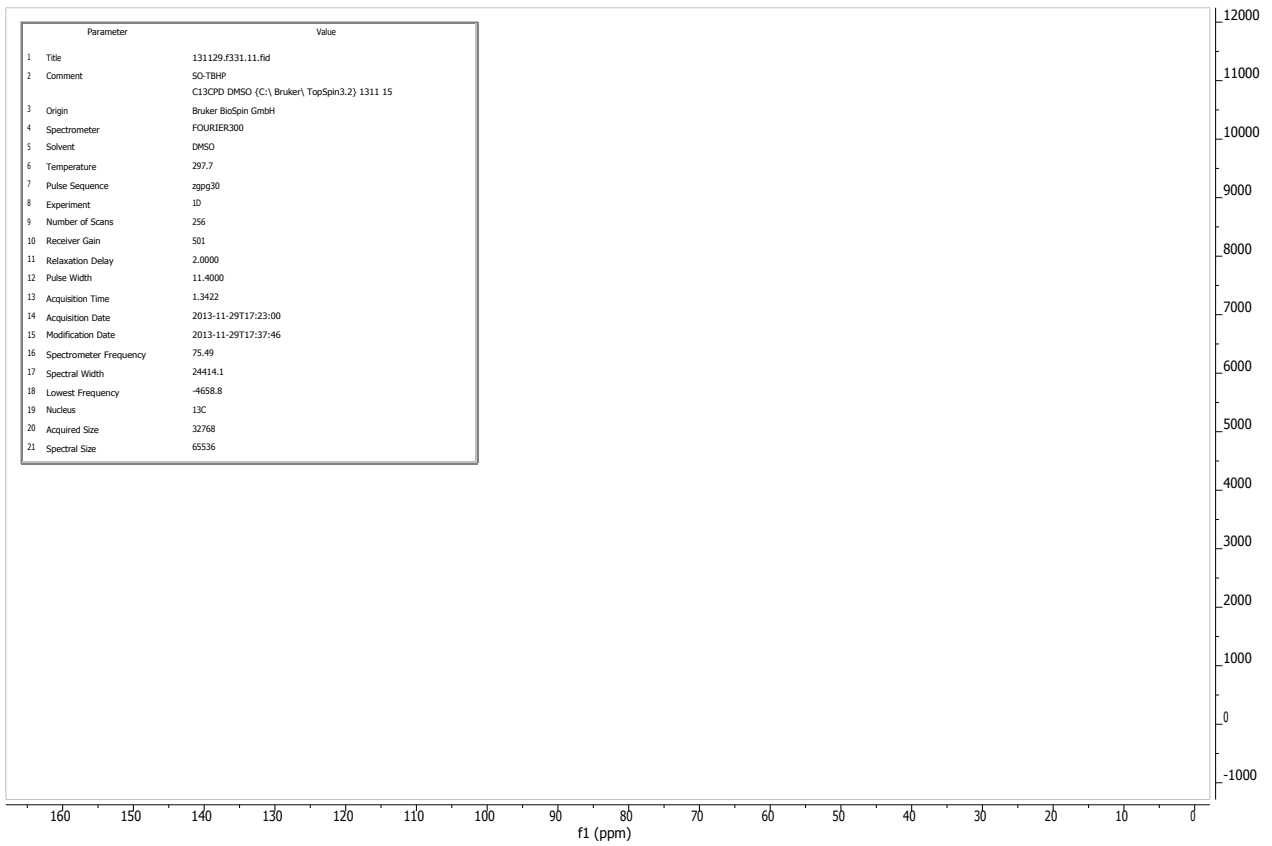

Supplement: c3ob42434k2.pdf [file c3ob42434k2.pdf]
